# Supplementary material for: Application of a core genome sequence typing (cgMLST) pipeline for surveillance of Clostridioides difficile in China
Source: Front Cell Infect Microbiol. 2023 Mar 13;13:1109153. doi: 10.3389/fcimb.2023.1109153 (PMC10040748; doi:10.3389/fcimb.2023.1109153)
Supplement: Supplementary file 2 [file Table_2.xls]

CoreGeneID	CHROM_ref	Start_ref	End_ref		Tpye	GeneID_ref	Info_ref
gene1003	AM180355.1	3864171	3866534	-	gene	ID=gene-CD630_33010	ID=gene-CD630_33010;Name=lon;gbkey=Gene;gene=lon;gene_biotype=protein_coding;locus_tag=CD630_33010
gene10035	AM180355.1	1619218	1620081	+	gene	ID=gene-CD630_13990	ID=gene-CD630_13990;Name=CD630_13990;gbkey=Gene;gene_biotype=protein_coding;locus_tag=CD630_13990
gene10036	AM180355.1	1546822	1547730	+	gene	ID=gene-CD630_13330	ID=gene-CD630_13330;Name=CD630_13330;gbkey=Gene;gene_biotype=protein_coding;locus_tag=CD630_13330
gene10056	AM180355.1	1419691	1420605	+	gene	ID=gene-CD630_12220	ID=gene-CD630_12220;Name=CD630_12220;gbkey=Gene;gene_biotype=protein_coding;locus_tag=CD630_12220
gene10057	AM180355.1	1747923	1748837	-	gene	ID=gene-CD630_15110	ID=gene-CD630_15110;Name=cotB;gbkey=Gene;gene=cotB;gene_biotype=protein_coding;locus_tag=CD630_15110
gene10058	AM180355.1	1765767	1766681	+	gene	ID=gene-CD630_15230	ID=gene-CD630_15230;Name=CD630_15230;gbkey=Gene;gene_biotype=protein_coding;locus_tag=CD630_15230
gene10059	AM180355.1	2737981	2738895	-	gene	ID=gene-CD630_23720	ID=gene-CD630_23720;Name=nadA;gbkey=Gene;gene=nadA;gene_biotype=protein_coding;locus_tag=CD630_23720
gene10061	AM180355.1	3539577	3540491	-	gene	ID=gene-CD630_30460	ID=gene-CD630_30460;Name=murQ;gbkey=Gene;gene=murQ;gene_biotype=protein_coding;locus_tag=CD630_30460
gene10086	AM180355.1	1258882	1259787	+	gene	ID=gene-CD630_10660	ID=gene-CD630_10660;Name=CD630_10660;gbkey=Gene;gene_biotype=protein_coding;locus_tag=CD630_10660
gene10105	AM180355.1	338303	339214	+	gene	ID=gene-CD630_02760	ID=gene-CD630_02760;Name=CD630_02760;gbkey=Gene;gene_biotype=protein_coding;locus_tag=CD630_02760
gene10106	AM180355.1	420193	421104	+	gene	ID=gene-CD630_03440	ID=gene-CD630_03440;Name=CD630_03440;gbkey=Gene;gene_biotype=protein_coding;locus_tag=CD630_03440
gene10108	AM180355.1	636501	637412	+	gene	ID=gene-CD630_05310	ID=gene-CD630_05310;Name=CD630_05310;gbkey=Gene;gene_biotype=protein_coding;locus_tag=CD630_05310
gene10109	AM180355.1	874770	875681	+	gene	ID=gene-CD630_07150	ID=gene-CD630_07150;Name=ptb1;gbkey=Gene;gene=ptb1;gene_biotype=protein_coding;locus_tag=CD630_07150
gene10110	AM180355.1	1029438	1030349	+	gene	ID=gene-CD630_08540	ID=gene-CD630_08540;Name=oppC;gbkey=Gene;gene=oppC;gene_biotype=protein_coding;locus_tag=CD630_08540
gene10111	AM180355.1	2475130	2476041	-	gene	ID=gene-CD630_21390	ID=gene-CD630_21390;Name=tsf;gbkey=Gene;gene=tsf;gene_biotype=protein_coding;locus_tag=CD630_21390
gene10112	AM180355.1	3004481	3005392	-	gene	ID=gene-CD630_25960	ID=gene-CD630_25960;Name=CD630_25960;gbkey=Gene;gene_biotype=protein_coding;locus_tag=CD630_25960
gene10114	AM180355.1	368579	369418	+	gene	ID=gene-CD630_03060	ID=gene-CD630_03060;Name=CD630_03060;gbkey=Gene;gene_biotype=protein_coding;locus_tag=CD630_03060
gene10150	AM180355.1	2035593	2036495	+	gene	ID=gene-CD630_17580	ID=gene-CD630_17580;Name=CD630_17580;gbkey=Gene;gene_biotype=protein_coding;locus_tag=CD630_17580
gene10190	AM180355.1	1849652	1850560	+	gene	ID=gene-CD630_15940	ID=gene-CD630_15940;Name=cysK;gbkey=Gene;gene=cysK;gene_biotype=protein_coding;locus_tag=CD630_15940
gene10191	AM180355.1	2255878	2256786	-	gene	ID=gene-CD630_19560	ID=gene-CD630_19560;Name=CD630_19560;gbkey=Gene;gene_biotype=protein_coding;locus_tag=CD630_19560
gene10192	AM180355.1	2449604	2450512	-	gene	ID=gene-CD630_21170	ID=gene-CD630_21170;Name=trxB2;gbkey=Gene;gene=trxB2;gene_biotype=protein_coding;locus_tag=CD630_21170
gene10193	AM180355.1	3224092	3225000	-	gene	ID=gene-CD630_27730	ID=gene-CD630_27730;Name=CD630_27730;gbkey=Gene;gene_biotype=protein_coding;locus_tag=CD630_27730
gene10194	AM180355.1	3844633	3845541	-	gene	ID=gene-CD630_32830	ID=gene-CD630_32830;Name=pflE;gbkey=Gene;gene=pflE;gene_biotype=protein_coding;locus_tag=CD630_32830
gene10196	AM180355.1	4223827	4224744	-	gene	ID=gene-CD630_36170	ID=gene-CD630_36170;Name=CD630_36170;gbkey=Gene;gene_biotype=protein_coding;locus_tag=CD630_36170
gene10239	AM180355.1	1271362	1272267	-	gene	ID=gene-CD630_10790	ID=gene-CD630_10790;Name=CD630_10790;gbkey=Gene;gene_biotype=protein_coding;locus_tag=CD630_10790
gene10240	AM180355.1	1523747	1524652	+	gene	ID=gene-CD630_13140	ID=gene-CD630_13140;Name=truB;gbkey=Gene;gene=truB;gene_biotype=protein_coding;locus_tag=CD630_13140
gene10241	AM180355.1	2506575	2507498	-	gene	ID=gene-CD630_21670	ID=gene-CD630_21670;Name=CD630_21670;gbkey=Gene;gene_biotype=protein_coding;locus_tag=CD630_21670
gene10242	AM180355.1	2858635	2859540	-	gene	ID=gene-CD630_24770	ID=gene-CD630_24770;Name=CD630_24770;gbkey=Gene;gene_biotype=protein_coding;locus_tag=CD630_24770
gene10243	AM180355.1	4012591	4013496	-	gene	ID=gene-CD630_34210	ID=gene-CD630_34210;Name=hemC;gbkey=Gene;gene=hemC;gene_biotype=protein_coding;locus_tag=CD630_34210
gene10257	AM180355.1	3485165	3486058	-	gene	ID=gene-CD630_30000	ID=gene-CD630_30000;Name=dapA1;gbkey=Gene;gene=dapA1;gene_biotype=protein_coding;locus_tag=CD630_30000
gene10273	AM180355.1	1318468	1319370	+	gene	ID=gene-CD630_11210	ID=gene-CD630_11210;Name=pflC;gbkey=Gene;gene=pflC;gene_biotype=protein_coding;locus_tag=CD630_11210
gene10276	AM180355.1	3209674	3210579	-	gene	ID=gene-CD630_27610	ID=gene-CD630_27610;Name=CD630_27610;gbkey=Gene;gene_biotype=protein_coding;locus_tag=CD630_27610
gene10287	AM180355.1	2082069	2082932	-	gene	ID=gene-CD630_18010	ID=gene-CD630_18010;Name=CD630_18010;gbkey=Gene;gene_biotype=protein_coding;locus_tag=CD630_18010
gene10297	AM180355.1	156254	157156	+	gene	ID=gene-CD630_01120	ID=gene-CD630_01120;Name=ptb;gbkey=Gene;gene=ptb;gene_biotype=protein_coding;locus_tag=CD630_01120
gene10298	AM180355.1	244200	245102	+	gene	ID=gene-CD630_01860	ID=gene-CD630_01860;Name=pyrD;gbkey=Gene;gene=pyrD;gene_biotype=protein_coding;locus_tag=CD630_01860
gene10300	AM180355.1	1253143	1254045	+	gene	ID=gene-CD630_10600	ID=gene-CD630_10600;Name=CD630_10600;gbkey=Gene;gene_biotype=protein_coding;locus_tag=CD630_10600
gene10301	AM180355.1	3090807	3091709	-	gene	ID=gene-CD630_26750	ID=gene-CD630_26750;Name=CD630_26750;gbkey=Gene;gene_biotype=protein_coding;locus_tag=CD630_26750
gene10302	AM180355.1	3486138	3487040	-	gene	ID=gene-CD630_30010	ID=gene-CD630_30010;Name=CD630_30010;gbkey=Gene;gene_biotype=protein_coding;locus_tag=CD630_30010
gene10350	AM180355.1	1612999	1613889	+	gene	ID=gene-CD630_13930	ID=gene-CD630_13930;Name=CD630_13930;gbkey=Gene;gene_biotype=protein_coding;locus_tag=CD630_13930
gene10365	AM180355.1	1632157	1633056	-	gene	ID=gene-CD630_14080	ID=gene-CD630_14080;Name=ddl;gbkey=Gene;gene=ddl;gene_biotype=protein_coding;locus_tag=CD630_14080
gene10367	AM180355.1	2375636	2376535	-	gene	ID=gene-CD630_20600	ID=gene-CD630_20600;Name=CD630_20600;gbkey=Gene;gene_biotype=protein_coding;locus_tag=CD630_20600
gene10381	AM180355.1	878517	879296	+	gene	ID=gene-CD630_07170	ID=gene-CD630_07170;Name=CD630_07170;gbkey=Gene;gene_biotype=protein_coding;locus_tag=CD630_07170
gene10385	AM180355.1	741229	742122	-	gene	ID=gene-CD630_06170	ID=gene-CD630_06170;Name=CD630_06170;gbkey=Gene;gene_biotype=protein_coding;locus_tag=CD630_06170
gene10407	AM180355.1	1460273	1461142	+	gene	ID=gene-CD630_12580	ID=gene-CD630_12580;Name=CD630_12580;gbkey=Gene;gene_biotype=protein_coding;locus_tag=CD630_12580
gene10448	AM180355.1	3283646	3284536	-	gene	ID=gene-CD630_28130	ID=gene-CD630_28130;Name=garR;gbkey=Gene;gene=garR;gene_biotype=protein_coding;locus_tag=CD630_28130
gene10455	AM180355.1	1344188	1345087	+	gene	ID=gene-CD630_11460	ID=gene-CD630_11460;Name=mreC;gbkey=Gene;gene=mreC;gene_biotype=protein_coding;locus_tag=CD630_11460
gene10456	AM180355.1	1781688	1782581	+	gene	ID=gene-CD630_15360	ID=gene-CD630_15360;Name=CD630_15360;gbkey=Gene;gene_biotype=protein_coding;locus_tag=CD630_15360
gene10457	AM180355.1	2453144	2454037	+	gene	ID=gene-CD630_21190	ID=gene-CD630_21190;Name=thrB;gbkey=Gene;gene=thrB;gene_biotype=protein_coding;locus_tag=CD630_21190
gene10458	AM180355.1	2531063	2531956	-	gene	ID=gene-CD630_21870	ID=gene-CD630_21870;Name=CD630_21870;gbkey=Gene;gene_biotype=protein_coding;locus_tag=CD630_21870
gene10459	AM180355.1	2800433	2801326	-	gene	ID=gene-CD630_24250	ID=gene-CD630_24250;Name=ptb2;gbkey=Gene;gene=ptb2;gene_biotype=protein_coding;locus_tag=CD630_24250
gene10460	AM180355.1	2814232	2815125	-	gene	ID=gene-CD630_24370	ID=gene-CD630_24370;Name=era;gbkey=Gene;gene=era;gene_biotype=protein_coding;locus_tag=CD630_24370
gene10462	AM180355.1	4072971	4073864	-	gene	ID=gene-CD630_34860	ID=gene-CD630_34860;Name=CD630_34860;gbkey=Gene;gene_biotype=protein_coding;locus_tag=CD630_34860
gene10463	AM180355.1	4142422	4143315	-	gene	ID=gene-CD630_35480	ID=gene-CD630_35480;Name=CD630_35480;gbkey=Gene;gene_biotype=protein_coding;locus_tag=CD630_35480
gene10465	AM180355.1	2083078	2083968	+	gene	ID=gene-CD630_18020	ID=gene-CD630_18020;Name=CD630_18020;gbkey=Gene;gene_biotype=protein_coding;locus_tag=CD630_18020
gene10485	AM180355.1	3855240	3856112	-	gene	ID=gene-CD630_32930	ID=gene-CD630_32930;Name=CD630_32930;gbkey=Gene;gene_biotype=protein_coding;locus_tag=CD630_32930
gene10521	AM180355.1	676060	676908	+	gene	ID=gene-CD630_05670	ID=gene-CD630_05670;Name=CD630_05670;gbkey=Gene;gene_biotype=protein_coding;locus_tag=CD630_05670
gene10532	AM180355.1	246964	247854	-	gene	ID=gene-CD630_01890	ID=gene-CD630_01890;Name=CD630_01890;gbkey=Gene;gene_biotype=protein_coding;locus_tag=CD630_01890
gene10533	AM180355.1	759258	760148	+	gene	ID=gene-CD630_06360	ID=gene-CD630_06360;Name=CD630_06360;gbkey=Gene;gene_biotype=protein_coding;locus_tag=CD630_06360
gene10534	AM180355.1	2112199	2113089	+	gene	ID=gene-CD630_18260	ID=gene-CD630_18260;Name=metA;gbkey=Gene;gene=metA;gene_biotype=protein_coding;locus_tag=CD630_18260
gene10536	AM180355.1	2892618	2893508	+	gene	ID=gene-CD630_25050	ID=gene-CD630_25050;Name=CD630_25050;gbkey=Gene;gene_biotype=protein_coding;locus_tag=CD630_25050
gene10569	AM180355.1	4180960	4181832	+	gene	ID=gene-CD630_35810	ID=gene-CD630_35810;Name=CD630_35810;gbkey=Gene;gene_biotype=protein_coding;locus_tag=CD630_35810
gene10585	AM180355.1	651171	651950	+	gene	ID=gene-CD630_05460	ID=gene-CD630_05460;Name=CD630_05460;gbkey=Gene;gene_biotype=protein_coding;locus_tag=CD630_05460
gene10588	AM180355.1	1146049	1146936	+	gene	ID=gene-CD630_09820	ID=gene-CD630_09820;Name=ubiA;gbkey=Gene;gene=ubiA;gene_biotype=protein_coding;locus_tag=CD630_09820
gene10589	AM180355.1	1403174	1404061	+	gene	ID=gene-CD630_12050	ID=gene-CD630_12050;Name=ispA;gbkey=Gene;gene=ispA;gene_biotype=protein_coding;locus_tag=CD630_12050
gene10591	AM180355.1	2250164	2251051	-	gene	ID=gene-CD630_19520	ID=gene-CD630_19520;Name=CD630_19520;gbkey=Gene;gene_biotype=protein_coding;locus_tag=CD630_19520
gene10592	AM180355.1	2587409	2588296	-	gene	ID=gene-CD630_22360	ID=gene-CD630_22360;Name=CD630_22360;gbkey=Gene;gene_biotype=protein_coding;locus_tag=CD630_22360
gene10593	AM180355.1	3774518	3775405	+	gene	ID=gene-CD630_32250	ID=gene-CD630_32250;Name=dapA3;gbkey=Gene;gene=dapA3;gene_biotype=protein_coding;locus_tag=CD630_32250
gene10594	AM180355.1	4021369	4022256	-	gene	ID=gene-CD630_34310	ID=gene-CD630_34310;Name=CD630_34310;gbkey=Gene;gene_biotype=protein_coding;locus_tag=CD630_34310
gene10626	AM180355.1	2343778	2344638	-	gene	ID=gene-CD630_20320	ID=gene-CD630_20320;Name=argB;gbkey=Gene;gene=argB;gene_biotype=protein_coding;locus_tag=CD630_20320
gene10641	AM180355.1	3023365	3024237	-	gene	ID=gene-CD630_26170	ID=gene-CD630_26170;Name=CD630_26170;gbkey=Gene;gene_biotype=protein_coding;locus_tag=CD630_26170
gene10642	AM180355.1	956716	957600	+	gene	ID=gene-CD630_07840	ID=gene-CD630_07840;Name=CD630_07840;gbkey=Gene;gene_biotype=protein_coding;locus_tag=CD630_07840
gene10643	AM180355.1	1015654	1016538	+	gene	ID=gene-CD630_08400	ID=gene-CD630_08400;Name=CD630_08400;gbkey=Gene;gene_biotype=protein_coding;locus_tag=CD630_08400
gene10644	AM180355.1	1734991	1735881	+	gene	ID=gene-CD630_14980	ID=gene-CD630_14980;Name=sigA2;gbkey=Gene;gene=sigA2;gene_biotype=protein_coding;locus_tag=CD630_14980
gene10645	AM180355.1	1876973	1877857	+	gene	ID=gene-CD630_16210	ID=gene-CD630_16210;Name=CD630_16210;gbkey=Gene;gene_biotype=protein_coding;locus_tag=CD630_16210
gene10646	AM180355.1	2933396	2934280	-	gene	ID=gene-CD630_25380	ID=gene-CD630_25380;Name=CD630_25380;gbkey=Gene;gene_biotype=protein_coding;locus_tag=CD630_25380
gene10647	AM180355.1	2979951	2980835	-	gene	ID=gene-CD630_25760	ID=gene-CD630_25760;Name=rsgA;gbkey=Gene;gene=rsgA;gene_biotype=protein_coding;locus_tag=CD630_25760
gene10650	AM180355.1	900184	901065	-	gene	ID=gene-CD630_07380	ID=gene-CD630_07380;Name=CD630_07380;gbkey=Gene;gene_biotype=protein_coding;locus_tag=CD630_07380
gene10693	AM180355.1	883669	884550	+	gene	ID=gene-CD630_07220	ID=gene-CD630_07220;Name=metF;gbkey=Gene;gene=metF;gene_biotype=protein_coding;locus_tag=CD630_07220
gene10694	AM180355.1	1764470	1765351	-	gene	ID=gene-CD630_15220	ID=gene-CD630_15220;Name=CD630_15220;gbkey=Gene;gene_biotype=protein_coding;locus_tag=CD630_15220
gene10695	AM180355.1	2215743	2216624	+	gene	ID=gene-CD630_19140	ID=gene-CD630_19140;Name=eutC;gbkey=Gene;gene=eutC;gene_biotype=protein_coding;locus_tag=CD630_19140
gene10696	AM180355.1	2591434	2592315	-	gene	ID=gene-CD630_22400	ID=gene-CD630_22400;Name=nanA;gbkey=Gene;gene=nanA;gene_biotype=protein_coding;locus_tag=CD630_22400
gene10697	AM180355.1	2994820	2995701	-	gene	ID=gene-CD630_25890	ID=gene-CD630_25890;Name=CD630_25890;gbkey=Gene;gene_biotype=protein_coding;locus_tag=CD630_25890
gene10698	AM180355.1	3081687	3082529	-	gene	ID=gene-CD630_26680	ID=gene-CD630_26680;Name=CD630_26680;gbkey=Gene;gene_biotype=protein_coding;locus_tag=CD630_26680
gene10699	AM180355.1	3136409	3137290	+	gene	ID=gene-CD630_27110	ID=gene-CD630_27110;Name=CD630_27110;gbkey=Gene;gene_biotype=protein_coding;locus_tag=CD630_27110
gene10700	AM180355.1	3524753	3525634	+	gene	ID=gene-CD630_30350	ID=gene-CD630_30350;Name=CD630_30350;gbkey=Gene;gene_biotype=protein_coding;locus_tag=CD630_30350
gene10701	AM180355.1	3533582	3534463	-	gene	ID=gene-CD630_30410	ID=gene-CD630_30410;Name=pepI;gbkey=Gene;gene=pepI;gene_biotype=protein_coding;locus_tag=CD630_30410
gene10702	AM180355.1	3772094	3772975	+	gene	ID=gene-CD630_32230	ID=gene-CD630_32230;Name=dapA2;gbkey=Gene;gene=dapA2;gene_biotype=protein_coding;locus_tag=CD630_32230
gene10703	AM180355.1	3788847	3789728	-	gene	ID=gene-CD630_32360	ID=gene-CD630_32360;Name=CD630_32360;gbkey=Gene;gene_biotype=protein_coding;locus_tag=CD630_32360
gene10704	AM180355.1	4248297	4249178	+	gene	ID=gene-CD630_36390	ID=gene-CD630_36390;Name=CD630_36390;gbkey=Gene;gene_biotype=protein_coding;locus_tag=CD630_36390
gene10739	AM180355.1	2361465	2362337	-	gene	ID=gene-CD630_20480	ID=gene-CD630_20480;Name=CD630_20480;gbkey=Gene;gene_biotype=protein_coding;locus_tag=CD630_20480
gene10744	AM180355.1	3469372	3470226	-	gene	ID=gene-CD630_29860	ID=gene-CD630_29860;Name=uppP2;gbkey=Gene;gene=uppP2;gene_biotype=protein_coding;locus_tag=CD630_29860
gene10751	AM180355.1	1072917	1073795	+	gene	ID=gene-CD630_08910	ID=gene-CD630_08910;Name=speB;gbkey=Gene;gene=speB;gene_biotype=protein_coding;locus_tag=CD630_08910
gene10752	AM180355.1	2810244	2811122	-	gene	ID=gene-CD630_24330	ID=gene-CD630_24330;Name=glyQ;gbkey=Gene;gene=glyQ;gene_biotype=protein_coding;locus_tag=CD630_24330
gene10753	AM180355.1	3473483	3474361	-	gene	ID=gene-CD630_29900	ID=gene-CD630_29900;Name=ssuB2;gbkey=Gene;gene=ssuB2;gene_biotype=protein_coding;locus_tag=CD630_29900
gene10754	AM180355.1	3653683	3654561	-	gene	ID=gene-CD630_31350	ID=gene-CD630_31350;Name=CD630_31350;gbkey=Gene;gene_biotype=protein_coding;locus_tag=CD630_31350
gene10755	AM180355.1	4060314	4061192	-	gene	ID=gene-CD630_34690	ID=gene-CD630_34690;Name=atpG;gbkey=Gene;gene=atpG;gene_biotype=protein_coding;locus_tag=CD630_34690
gene10756	AM180355.1	4109794	4110672	-	gene	ID=gene-CD630_35170	ID=gene-CD630_35170;Name=purR;gbkey=Gene;gene=purR;gene_biotype=protein_coding;locus_tag=CD630_35170
gene10779	AM180355.1	3449377	3450252	-	gene	ID=gene-CD630_29680	ID=gene-CD630_29680;Name=spoVFA;gbkey=Gene;gene=spoVFA;gene_biotype=protein_coding;locus_tag=CD630_29680
gene10791	AM180355.1	249367	250242	+	gene	ID=gene-CD630_01910	ID=gene-CD630_01910;Name=CD630_01910;gbkey=Gene;gene_biotype=protein_coding;locus_tag=CD630_01910
gene10792	AM180355.1	1414973	1415848	+	gene	ID=gene-CD630_12160	ID=gene-CD630_12160;Name=CD630_12160;gbkey=Gene;gene_biotype=protein_coding;locus_tag=CD630_12160
gene10793	AM180355.1	1741030	1741905	+	gene	ID=gene-CD630_15040	ID=gene-CD630_15040;Name=CD630_15040;gbkey=Gene;gene_biotype=protein_coding;locus_tag=CD630_15040
gene10794	AM180355.1	2268834	2269709	-	gene	ID=gene-CD630_19670	ID=gene-CD630_19670;Name=CD630_19670;gbkey=Gene;gene_biotype=protein_coding;locus_tag=CD630_19670
gene10795	AM180355.1	3141599	3142474	-	gene	ID=gene-CD630_27150	ID=gene-CD630_27150;Name=gtaB;gbkey=Gene;gene=gtaB;gene_biotype=protein_coding;locus_tag=CD630_27150
gene10796	AM180355.1	3766987	3767862	-	gene	ID=gene-CD630_32190	ID=gene-CD630_32190;Name=hslO;gbkey=Gene;gene=hslO;gene_biotype=protein_coding;locus_tag=CD630_32190
gene10825	AM180355.1	2577456	2578313	-	gene	ID=gene-CD630_22270	ID=gene-CD630_22270;Name=CD630_22270;gbkey=Gene;gene_biotype=protein_coding;locus_tag=CD630_22270
gene10841	AM180355.1	882059	882922	+	gene	ID=gene-CD630_07200	ID=gene-CD630_07200;Name=folD;gbkey=Gene;gene=folD;gene_biotype=protein_coding;locus_tag=CD630_07200
gene10844	AM180355.1	2714141	2715013	+	gene	ID=gene-CD630_23450	ID=gene-CD630_23450;Name=CD630_23450;gbkey=Gene;gene_biotype=protein_coding;locus_tag=CD630_23450
gene10846	AM180355.1	4031482	4032354	+	gene	ID=gene-CD630_34400	ID=gene-CD630_34400;Name=CD630_34400;gbkey=Gene;gene_biotype=protein_coding;locus_tag=CD630_34400
gene10869	AM180355.1	3570276	3571145	-	gene	ID=gene-CD630_30740	ID=gene-CD630_30740;Name=CD630_30740;gbkey=Gene;gene_biotype=protein_coding;locus_tag=CD630_30740
gene10880	AM180355.1	1243525	1244385	+	gene	ID=gene-CD630_10500	ID=gene-CD630_10500;Name=CD630_10500;gbkey=Gene;gene_biotype=protein_coding;locus_tag=CD630_10500
gene10911	AM180355.1	1323349	1324218	+	gene	ID=gene-CD630_11250	ID=gene-CD630_11250;Name=CD630_11250;gbkey=Gene;gene_biotype=protein_coding;locus_tag=CD630_11250
gene10912	AM180355.1	1807104	1807973	+	gene	ID=gene-CD630_15590	ID=gene-CD630_15590;Name=rsiV;gbkey=Gene;gene=rsiV;gene_biotype=protein_coding;locus_tag=CD630_15590
gene10913	AM180355.1	1851579	1852448	-	gene	ID=gene-CD630_15960	ID=gene-CD630_15960;Name=map2;gbkey=Gene;gene=map2;gene_biotype=protein_coding;locus_tag=CD630_15960
gene10915	AM180355.1	3078230	3079099	+	gene	ID=gene-CD630_26650	ID=gene-CD630_26650;Name=CD630_26650;gbkey=Gene;gene_biotype=protein_coding;locus_tag=CD630_26650
gene10916	AM180355.1	3174212	3175081	+	gene	ID=gene-CD630_27360	ID=gene-CD630_27360;Name=CD630_27360;gbkey=Gene;gene_biotype=protein_coding;locus_tag=CD630_27360
gene10918	AM180355.1	3816957	3817826	-	gene	ID=gene-CD630_32590	ID=gene-CD630_32590;Name=CD630_32590;gbkey=Gene;gene_biotype=protein_coding;locus_tag=CD630_32590
gene10919	AM180355.1	4001911	4002780	-	gene	ID=gene-CD630_34160	ID=gene-CD630_34160;Name=CD630_34160;gbkey=Gene;gene_biotype=protein_coding;locus_tag=CD630_34160
gene10920	AM180355.1	4116850	4117719	-	gene	ID=gene-CD630_35230	ID=gene-CD630_35230;Name=ksgA;gbkey=Gene;gene=ksgA;gene_biotype=protein_coding;locus_tag=CD630_35230
gene10943	AM180355.1	4169840	4170700	-	gene	ID=gene-CD630_35690	ID=gene-CD630_35690;Name=CD630_35690;gbkey=Gene;gene_biotype=protein_coding;locus_tag=CD630_35690
gene11008	AM180355.1	1086376	1087242	+	gene	ID=gene-CD630_09020	ID=gene-CD630_09020;Name=CD630_09020;gbkey=Gene;gene_biotype=protein_coding;locus_tag=CD630_09020
gene11009	AM180355.1	1324444	1325310	+	gene	ID=gene-CD630_11260	ID=gene-CD630_11260;Name=CD630_11260;gbkey=Gene;gene_biotype=protein_coding;locus_tag=CD630_11260
gene11010	AM180355.1	1409285	1410151	+	gene	ID=gene-CD630_12100	ID=gene-CD630_12100;Name=CD630_12100;gbkey=Gene;gene_biotype=protein_coding;locus_tag=CD630_12100
gene11011	AM180355.1	1672250	1673116	+	gene	ID=gene-CD630_14410	ID=gene-CD630_14410;Name=CD630_14410;gbkey=Gene;gene_biotype=protein_coding;locus_tag=CD630_14410
gene11014	AM180355.1	3805243	3806109	-	gene	ID=gene-CD630_32510	ID=gene-CD630_32510;Name=CD630_32510;gbkey=Gene;gene_biotype=protein_coding;locus_tag=CD630_32510
gene11065	AM180355.1	1750281	1751129	-	gene	ID=gene-CD630_15120	ID=gene-CD630_15120;Name=panC;gbkey=Gene;gene=panC;gene_biotype=protein_coding;locus_tag=CD630_15120
gene11079	AM180355.1	349331	350194	+	gene	ID=gene-CD630_02890	ID=gene-CD630_02890;Name=CD630_02890;gbkey=Gene;gene_biotype=protein_coding;locus_tag=CD630_02890
gene11081	AM180355.1	648088	648951	+	gene	ID=gene-CD630_05430	ID=gene-CD630_05430;Name=CD630_05430;gbkey=Gene;gene_biotype=protein_coding;locus_tag=CD630_05430
gene11083	AM180355.1	3132202	3133065	-	gene	ID=gene-CD630_27080	ID=gene-CD630_27080;Name=aroE2;gbkey=Gene;gene=aroE2;gene_biotype=protein_coding;locus_tag=CD630_27080
gene11084	AM180355.1	3137498	3138337	-	gene	ID=gene-CD630_27120	ID=gene-CD630_27120;Name=CD630_27120;gbkey=Gene;gene_biotype=protein_coding;locus_tag=CD630_27120
gene11085	AM180355.1	3927787	3928605	-	gene	ID=gene-CD630_33630	ID=gene-CD630_33630;Name=CD630_33630;gbkey=Gene;gene_biotype=protein_coding;locus_tag=CD630_33630
gene11086	AM180355.1	4280502	4281365	-	gene	ID=gene-CD630_36710	ID=gene-CD630_36710;Name=spo0J;gbkey=Gene;gene=spo0J;gene_biotype=protein_coding;locus_tag=CD630_36710
gene11142	AM180355.1	2248318	2249178	+	gene	ID=gene-CD630_19500	ID=gene-CD630_19500;Name=CD630_19500;gbkey=Gene;gene_biotype=protein_coding;locus_tag=CD630_19500
gene11143	AM180355.1	2767388	2768248	-	gene	ID=gene-CD630_23980	ID=gene-CD630_23980;Name=CD630_23980;gbkey=Gene;gene_biotype=protein_coding;locus_tag=CD630_23980
gene11145	AM180355.1	3630210	3631070	-	gene	ID=gene-CD630_31170	ID=gene-CD630_31170;Name=bglG2;gbkey=Gene;gene=bglG2;gene_biotype=protein_coding;locus_tag=CD630_31170
gene11146	AM180355.1	4001007	4001867	-	gene	ID=gene-CD630_34150	ID=gene-CD630_34150;Name=CD630_34150;gbkey=Gene;gene_biotype=protein_coding;locus_tag=CD630_34150
gene11148	AM180355.1	538777	539613	+	gene	ID=gene-CD630_04540	ID=gene-CD630_04540;Name=CD630_04540;gbkey=Gene;gene_biotype=protein_coding;locus_tag=CD630_04540
gene1119	AM180355.1	2532182	2534467	-	gene	ID=gene-CD630_21880	ID=gene-CD630_21880;Name=mapA;gbkey=Gene;gene=mapA;gene_biotype=protein_coding;locus_tag=CD630_21880
gene11199	AM180355.1	2578422	2579222	-	gene	ID=gene-CD630_22280	ID=gene-CD630_22280;Name=CD630_22280;gbkey=Gene;gene_biotype=protein_coding;locus_tag=CD630_22280
gene11200	AM180355.1	3978308	3979165	-	gene	ID=gene-CD630_34000	ID=gene-CD630_34000;Name=CD630_34000;gbkey=Gene;gene_biotype=protein_coding;locus_tag=CD630_34000
gene11201	AM180355.1	4182518	4183375	+	gene	ID=gene-CD630_35830	ID=gene-CD630_35830;Name=CD630_35830;gbkey=Gene;gene_biotype=protein_coding;locus_tag=CD630_35830
gene11210	AM180355.1	1196813	1197649	+	gene	ID=gene-CD630_10250	ID=gene-CD630_10250;Name=potB;gbkey=Gene;gene=potB;gene_biotype=protein_coding;locus_tag=CD630_10250
gene1124	AM180355.1	2388913	2391219	-	gene	ID=gene-CD630_20730	ID=gene-CD630_20730;Name=xdhA;gbkey=Gene;gene=xdhA;gene_biotype=protein_coding;locus_tag=CD630_20730
gene11247	AM180355.1	1017940	1018794	+	gene	ID=gene-CD630_08420	ID=gene-CD630_08420;Name=CD630_08420;gbkey=Gene;gene_biotype=protein_coding;locus_tag=CD630_08420
gene11249	AM180355.1	2234613	2235467	-	gene	ID=gene-CD630_19370	ID=gene-CD630_19370;Name=accD;gbkey=Gene;gene=accD;gene_biotype=protein_coding;locus_tag=CD630_19370
gene11250	AM180355.1	2335792	2336655	+	gene	ID=gene-CD630_20240	ID=gene-CD630_20240;Name=CD630_20240;gbkey=Gene;gene_biotype=protein_coding;locus_tag=CD630_20240
gene11251	AM180355.1	3279581	3280435	+	gene	ID=gene-CD630_28100	ID=gene-CD630_28100;Name=CD630_28100;gbkey=Gene;gene_biotype=protein_coding;locus_tag=CD630_28100
gene11252	AM180355.1	3505322	3506176	+	gene	ID=gene-CD630_30170	ID=gene-CD630_30170;Name=CD630_30170;gbkey=Gene;gene_biotype=protein_coding;locus_tag=CD630_30170
gene11280	AM180355.1	1916589	1917386	-	gene	ID=gene-CD630_16530	ID=gene-CD630_16530;Name=CD630_16530;gbkey=Gene;gene_biotype=protein_coding;locus_tag=CD630_16530
gene11296	AM180355.1	634726	635577	-	gene	ID=gene-CD630_05300	ID=gene-CD630_05300;Name=CD630_05300;gbkey=Gene;gene_biotype=protein_coding;locus_tag=CD630_05300
gene11297	AM180355.1	1072076	1072927	+	gene	ID=gene-CD630_08900	ID=gene-CD630_08900;Name=speE;gbkey=Gene;gene=speE;gene_biotype=protein_coding;locus_tag=CD630_08900
gene11298	AM180355.1	1780211	1781062	-	gene	ID=gene-CD630_15350	ID=gene-CD630_15350;Name=sseA;gbkey=Gene;gene=sseA;gene_biotype=protein_coding;locus_tag=CD630_15350
gene11299	AM180355.1	3492774	3493625	-	gene	ID=gene-CD630_30070	ID=gene-CD630_30070;Name=CD630_30070;gbkey=Gene;gene_biotype=protein_coding;locus_tag=CD630_30070
gene11300	AM180355.1	3537679	3538530	-	gene	ID=gene-CD630_30440	ID=gene-CD630_30440;Name=CD630_30440;gbkey=Gene;gene_biotype=protein_coding;locus_tag=CD630_30440
gene11301	AM180355.1	4040202	4041053	-	gene	ID=gene-CD630_34480	ID=gene-CD630_34480;Name=CD630_34480;gbkey=Gene;gene_biotype=protein_coding;locus_tag=CD630_34480
gene11302	AM180355.1	4210403	4211254	-	gene	ID=gene-CD630_36030	ID=gene-CD630_36030;Name=CD630_36030;gbkey=Gene;gene_biotype=protein_coding;locus_tag=CD630_36030
gene11319	AM180355.1	1526313	1527158	+	gene	ID=gene-CD630_13170	ID=gene-CD630_13170;Name=CD630_13170;gbkey=Gene;gene_biotype=protein_coding;locus_tag=CD630_13170
gene11362	AM180355.1	994180	995028	+	gene	ID=gene-CD630_08190	ID=gene-CD630_08190;Name=CD630_08190;gbkey=Gene;gene_biotype=protein_coding;locus_tag=CD630_08190
gene11363	AM180355.1	1199710	1200558	+	gene	ID=gene-CD630_10280	ID=gene-CD630_10280;Name=CD630_10280;gbkey=Gene;gene_biotype=protein_coding;locus_tag=CD630_10280
gene11365	AM180355.1	2586542	2587390	-	gene	ID=gene-CD630_22350	ID=gene-CD630_22350;Name=CD630_22350;gbkey=Gene;gene_biotype=protein_coding;locus_tag=CD630_22350
gene11366	AM180355.1	3135148	3135996	-	gene	ID=gene-CD630_27100	ID=gene-CD630_27100;Name=CD630_27100;gbkey=Gene;gene_biotype=protein_coding;locus_tag=CD630_27100
gene11367	AM180355.1	4072105	4072953	-	gene	ID=gene-CD630_34850	ID=gene-CD630_34850;Name=hemK;gbkey=Gene;gene=hemK;gene_biotype=protein_coding;locus_tag=CD630_34850
gene11368	AM180355.1	4243980	4244834	-	gene	ID=gene-CD630_36350	ID=gene-CD630_36350;Name=CD630_36350;gbkey=Gene;gene_biotype=protein_coding;locus_tag=CD630_36350
gene11388	AM180355.1	3688992	3689819	+	gene	ID=gene-CD630_31580	ID=gene-CD630_31580;Name=CD630_31580;gbkey=Gene;gene_biotype=protein_coding;locus_tag=CD630_31580
gene11395	AM180355.1	1412597	1413421	+	gene	ID=gene-CD630_12140	ID=gene-CD630_12140;Name=spo0A;gbkey=Gene;gene=spo0A;gene_biotype=protein_coding;locus_tag=CD630_12140
gene11398	AM180355.1	3226990	3227829	-	gene	ID=gene-CD630_27760	ID=gene-CD630_27760;Name=CD630_27760;gbkey=Gene;gene_biotype=protein_coding;locus_tag=CD630_27760
gene11407	AM180355.1	1250840	1251685	+	gene	ID=gene-CD630_10580	ID=gene-CD630_10580;Name=hbd;gbkey=Gene;gene=hbd;gene_biotype=protein_coding;locus_tag=CD630_10580
gene11408	AM180355.1	1648317	1649162	-	gene	ID=gene-CD630_14200	ID=gene-CD630_14200;Name=dccA;gbkey=Gene;gene=dccA;gene_biotype=protein_coding;locus_tag=CD630_14200
gene11409	AM180355.1	2032005	2032850	+	gene	ID=gene-CD630_17530	ID=gene-CD630_17530;Name=CD630_17530;gbkey=Gene;gene_biotype=protein_coding;locus_tag=CD630_17530
gene11410	AM180355.1	2231800	2232645	-	gene	ID=gene-CD630_19330	ID=gene-CD630_19330;Name=CD630_19330;gbkey=Gene;gene_biotype=protein_coding;locus_tag=CD630_19330
gene11411	AM180355.1	3051404	3052249	-	gene	ID=gene-CD630_26440	ID=gene-CD630_26440;Name=spoIIGA;gbkey=Gene;gene=spoIIGA;gene_biotype=protein_coding;locus_tag=CD630_26440
gene11412	AM180355.1	3747292	3748137	-	gene	ID=gene-CD630_32010	ID=gene-CD630_32010;Name=CD630_32010;gbkey=Gene;gene_biotype=protein_coding;locus_tag=CD630_32010
gene11446	AM180355.1	947930	948772	+	gene	ID=gene-CD630_07770	ID=gene-CD630_07770;Name=CD630_07770;gbkey=Gene;gene_biotype=protein_coding;locus_tag=CD630_07770
gene11448	AM180355.1	1270360	1271202	+	gene	ID=gene-CD630_10780	ID=gene-CD630_10780;Name=CD630_10780;gbkey=Gene;gene_biotype=protein_coding;locus_tag=CD630_10780
gene11449	AM180355.1	3021205	3022047	-	gene	ID=gene-CD630_26140	ID=gene-CD630_26140;Name=CD630_26140;gbkey=Gene;gene_biotype=protein_coding;locus_tag=CD630_26140
gene11450	AM180355.1	3640611	3641474	-	gene	ID=gene-CD630_31260	ID=gene-CD630_31260;Name=bglG3;gbkey=Gene;gene=bglG3;gene_biotype=protein_coding;locus_tag=CD630_31260
gene11476	AM180355.1	1045819	1046631	+	gene	ID=gene-CD630_08690	ID=gene-CD630_08690;Name=modA;gbkey=Gene;gene=modA;gene_biotype=protein_coding;locus_tag=CD630_08690
gene1150	AM180355.1	2398573	2400864	-	gene	ID=gene-CD630_20790	ID=gene-CD630_20790;Name=xdhA1;gbkey=Gene;gene=xdhA1;gene_biotype=protein_coding;locus_tag=CD630_20790
gene11502	AM180355.1	153933	154772	+	gene	ID=gene-CD630_01100	ID=gene-CD630_01100;Name=CD630_01100;gbkey=Gene;gene_biotype=protein_coding;locus_tag=CD630_01100
gene11503	AM180355.1	583393	584232	+	gene	ID=gene-CD630_04940	ID=gene-CD630_04940;Name=CD630_04940;gbkey=Gene;gene_biotype=protein_coding;locus_tag=CD630_04940
gene11504	AM180355.1	1172153	1172992	+	gene	ID=gene-CD630_10030	ID=gene-CD630_10030;Name=fumA;gbkey=Gene;gene=fumA;gene_biotype=protein_coding;locus_tag=CD630_10030
gene11505	AM180355.1	1827640	1828479	+	gene	ID=gene-CD630_15780	ID=gene-CD630_15780;Name=CD630_15780;gbkey=Gene;gene_biotype=protein_coding;locus_tag=CD630_15780
gene11506	AM180355.1	2100159	2100998	+	gene	ID=gene-CD630_18180	ID=gene-CD630_18180;Name=ispH;gbkey=Gene;gene=ispH;gene_biotype=protein_coding;locus_tag=CD630_18180
gene11507	AM180355.1	2128348	2129187	+	gene	ID=gene-CD630_18390	ID=gene-CD630_18390;Name=tyrC;gbkey=Gene;gene=tyrC;gene_biotype=protein_coding;locus_tag=CD630_18390
gene11508	AM180355.1	2861904	2862743	-	gene	ID=gene-CD630_24800	ID=gene-CD630_24800;Name=CD630_24800;gbkey=Gene;gene_biotype=protein_coding;locus_tag=CD630_24800
gene11569	AM180355.1	460765	461601	+	gene	ID=gene-CD630_03900	ID=gene-CD630_03900;Name=bglG;gbkey=Gene;gene=bglG;gene_biotype=protein_coding;locus_tag=CD630_03900
gene11570	AM180355.1	667037	667873	+	gene	ID=gene-CD630_05600	ID=gene-CD630_05600;Name=nfo;gbkey=Gene;gene=nfo;gene_biotype=protein_coding;locus_tag=CD630_05600
gene11571	AM180355.1	1500644	1501480	-	gene	ID=gene-CD630_12930	ID=gene-CD630_12930;Name=CD630_12930;gbkey=Gene;gene_biotype=protein_coding;locus_tag=CD630_12930
gene11572	AM180355.1	1960346	1961191	+	gene	ID=gene-CD630_16870	ID=gene-CD630_16870;Name=CD630_16870;gbkey=Gene;gene_biotype=protein_coding;locus_tag=CD630_16870
gene11573	AM180355.1	2735850	2736662	-	gene	ID=gene-CD630_23700	ID=gene-CD630_23700;Name=nadC;gbkey=Gene;gene=nadC;gene_biotype=protein_coding;locus_tag=CD630_23700
gene11574	AM180355.1	2784027	2784869	-	gene	ID=gene-CD630_24110	ID=gene-CD630_24110;Name=CD630_24110;gbkey=Gene;gene_biotype=protein_coding;locus_tag=CD630_24110
gene11575	AM180355.1	2859728	2860564	+	gene	ID=gene-CD630_24780	ID=gene-CD630_24780;Name=CD630_24780;gbkey=Gene;gene_biotype=protein_coding;locus_tag=CD630_24780
gene11577	AM180355.1	4126610	4127446	-	gene	ID=gene-CD630_35310	ID=gene-CD630_35310;Name=CD630_35310;gbkey=Gene;gene_biotype=protein_coding;locus_tag=CD630_35310
gene11617	AM180355.1	1998535	1999344	-	gene	ID=gene-CD630_17250	ID=gene-CD630_17250;Name=CD630_17250;gbkey=Gene;gene_biotype=protein_coding;locus_tag=CD630_17250
gene11618	AM180355.1	1569536	1570357	-	gene	ID=gene-CD630_13530	ID=gene-CD630_13530;Name=CD630_13530;gbkey=Gene;gene_biotype=protein_coding;locus_tag=CD630_13530
gene11630	AM180355.1	1804700	1805533	+	gene	ID=gene-CD630_15560	ID=gene-CD630_15560;Name=CD630_15560;gbkey=Gene;gene_biotype=protein_coding;locus_tag=CD630_15560
gene11634	AM180355.1	4140764	4141597	-	gene	ID=gene-CD630_35460	ID=gene-CD630_35460;Name=rsmI;gbkey=Gene;gene=rsmI;gene_biotype=protein_coding;locus_tag=CD630_35460
gene11647	AM180355.1	3924171	3924884	-	gene	ID=gene-CD630_33600	ID=gene-CD630_33600;Name=CD630_33600;gbkey=Gene;gene_biotype=protein_coding;locus_tag=CD630_33600
gene11659	AM180355.1	343008	343751	-	gene	ID=gene-CD630_02820	ID=gene-CD630_02820;Name=CD630_02820;gbkey=Gene;gene_biotype=protein_coding;locus_tag=CD630_02820
gene11663	AM180355.1	2426691	2427479	-	gene	ID=gene-CD630_21010	ID=gene-CD630_21010;Name=xdhB;gbkey=Gene;gene=xdhB;gene_biotype=protein_coding;locus_tag=CD630_21010
gene11673	AM180355.1	1185366	1186196	-	gene	ID=gene-CD630_10160	ID=gene-CD630_10160;Name=CD630_10160;gbkey=Gene;gene_biotype=protein_coding;locus_tag=CD630_10160
gene11674	AM180355.1	1223579	1224409	+	gene	ID=gene-CD630_10390	ID=gene-CD630_10390;Name=CD630_10390;gbkey=Gene;gene_biotype=protein_coding;locus_tag=CD630_10390
gene11675	AM180355.1	2036847	2037677	+	gene	ID=gene-CD630_17590	ID=gene-CD630_17590;Name=CD630_17590;gbkey=Gene;gene_biotype=protein_coding;locus_tag=CD630_17590
gene11676	AM180355.1	2995705	2996535	-	gene	ID=gene-CD630_25900	ID=gene-CD630_25900;Name=dapF;gbkey=Gene;gene=dapF;gene_biotype=protein_coding;locus_tag=CD630_25900
gene1171	AM180355.1	3360414	3362693	+	gene	ID=gene-CD630_28730	ID=gene-CD630_28730;Name=CD630_28730;gbkey=Gene;gene_biotype=protein_coding;locus_tag=CD630_28730
gene11725	AM180355.1	1949219	1950043	+	gene	ID=gene-CD630_16730	ID=gene-CD630_16730;Name=CD630_16730;gbkey=Gene;gene_biotype=protein_coding;locus_tag=CD630_16730
gene11728	AM180355.1	577809	578636	-	gene	ID=gene-CD630_04870	ID=gene-CD630_04870;Name=CD630_04870;gbkey=Gene;gene_biotype=protein_coding;locus_tag=CD630_04870
gene11729	AM180355.1	3814559	3815386	-	gene	ID=gene-CD630_32570	ID=gene-CD630_32570;Name=CD630_32570;gbkey=Gene;gene_biotype=protein_coding;locus_tag=CD630_32570
gene11730	AM180355.1	4053873	4054700	-	gene	ID=gene-CD630_34600	ID=gene-CD630_34600;Name=tkt3;gbkey=Gene;gene=tkt3;gene_biotype=protein_coding;locus_tag=CD630_34600
gene1174	AM180355.1	3074062	3076341	-	gene	ID=gene-CD630_26630	ID=gene-CD630_26630;Name=CD630_26630;gbkey=Gene;gene_biotype=protein_coding;locus_tag=CD630_26630
gene11781	AM180355.1	1808813	1809634	+	gene	ID=gene-CD630_15610	ID=gene-CD630_15610;Name=CD630_15610;gbkey=Gene;gene_biotype=protein_coding;locus_tag=CD630_15610
gene11787	AM180355.1	740227	741051	-	gene	ID=gene-CD630_06160	ID=gene-CD630_06160;Name=CD630_06160;gbkey=Gene;gene_biotype=protein_coding;locus_tag=CD630_06160
gene11788	AM180355.1	1416572	1417396	+	gene	ID=gene-CD630_12180	ID=gene-CD630_12180;Name=CD630_12180;gbkey=Gene;gene_biotype=protein_coding;locus_tag=CD630_12180
gene11789	AM180355.1	1545741	1546565	-	gene	ID=gene-CD630_13320	ID=gene-CD630_13320;Name=uppP1;gbkey=Gene;gene=uppP1;gene_biotype=protein_coding;locus_tag=CD630_13320
gene11790	AM180355.1	1657509	1658333	-	gene	ID=gene-CD630_14300	ID=gene-CD630_14300;Name=CD630_14300;gbkey=Gene;gene_biotype=protein_coding;locus_tag=CD630_14300
gene11791	AM180355.1	1861204	1862028	+	gene	ID=gene-CD630_16080	ID=gene-CD630_16080;Name=CD630_16080;gbkey=Gene;gene_biotype=protein_coding;locus_tag=CD630_16080
gene11792	AM180355.1	2463409	2464233	-	gene	ID=gene-CD630_21270	ID=gene-CD630_21270;Name=CD630_21270;gbkey=Gene;gene_biotype=protein_coding;locus_tag=CD630_21270
gene11793	AM180355.1	3819448	3820272	-	gene	ID=gene-CD630_32620	ID=gene-CD630_32620;Name=pstA;gbkey=Gene;gene=pstA;gene_biotype=protein_coding;locus_tag=CD630_32620
gene11822	AM180355.1	4066403	4067218	-	gene	ID=gene-CD630_34780	ID=gene-CD630_34780;Name=CD630_34780;gbkey=Gene;gene_biotype=protein_coding;locus_tag=CD630_34780
gene11864	AM180355.1	393102	393923	+	gene	ID=gene-CD630_03270	ID=gene-CD630_03270;Name=cbiO;gbkey=Gene;gene=cbiO;gene_biotype=protein_coding;locus_tag=CD630_03270
gene11865	AM180355.1	859650	860471	+	gene	ID=gene-CD630_07060	ID=gene-CD630_07060;Name=CD630_07060;gbkey=Gene;gene_biotype=protein_coding;locus_tag=CD630_07060
gene11867	AM180355.1	2537509	2538330	-	gene	ID=gene-CD630_21910	ID=gene-CD630_21910;Name=CD630_21910;gbkey=Gene;gene_biotype=protein_coding;locus_tag=CD630_21910
gene11868	AM180355.1	2605782	2606603	-	gene	ID=gene-CD630_22490	ID=gene-CD630_22490;Name=CD630_22490;gbkey=Gene;gene_biotype=protein_coding;locus_tag=CD630_22490
gene11869	AM180355.1	2728293	2729114	+	gene	ID=gene-CD630_23590	ID=gene-CD630_23590;Name=CD630_23590;gbkey=Gene;gene_biotype=protein_coding;locus_tag=CD630_23590
gene11870	AM180355.1	2886386	2887207	-	gene	ID=gene-CD630_25010	ID=gene-CD630_25010;Name=CD630_25010;gbkey=Gene;gene_biotype=protein_coding;locus_tag=CD630_25010
gene1190	AM180355.1	394178	396442	+	gene	ID=gene-CD630_03280	ID=gene-CD630_03280;Name=pcrA;gbkey=Gene;gene=pcrA;gene_biotype=protein_coding;locus_tag=CD630_03280
gene1191	AM180355.1	2423974	2426238	-	gene	ID=gene-CD630_20990	ID=gene-CD630_20990;Name=XdhD;gbkey=Gene;gene=XdhD;gene_biotype=protein_coding;locus_tag=CD630_20990
gene11931	AM180355.1	680846	681664	+	gene	ID=gene-CD630_05720	ID=gene-CD630_05720;Name=CD630_05720;gbkey=Gene;gene_biotype=protein_coding;locus_tag=CD630_05720
gene11932	AM180355.1	841629	842447	-	gene	ID=gene-CD630_06930	ID=gene-CD630_06930;Name=CD630_06930;gbkey=Gene;gene_biotype=protein_coding;locus_tag=CD630_06930
gene11933	AM180355.1	1757492	1758310	+	gene	ID=gene-CD630_15160	ID=gene-CD630_15160;Name=CD630_15160;gbkey=Gene;gene_biotype=protein_coding;locus_tag=CD630_15160
gene11934	AM180355.1	2922963	2923781	-	gene	ID=gene-CD630_25300	ID=gene-CD630_25300;Name=CD630_25300;gbkey=Gene;gene_biotype=protein_coding;locus_tag=CD630_25300
gene11973	AM180355.1	3028702	3029487	-	gene	ID=gene-CD630_26200	ID=gene-CD630_26200;Name=CD630_26200;gbkey=Gene;gene_biotype=protein_coding;locus_tag=CD630_26200
gene11989	AM180355.1	3926996	3927775	-	gene	ID=gene-CD630_33620	ID=gene-CD630_33620;Name=CD630_33620;gbkey=Gene;gene_biotype=protein_coding;locus_tag=CD630_33620
gene11994	AM180355.1	896589	897404	+	gene	ID=gene-CD630_07330	ID=gene-CD630_07330;Name=CD630_07330;gbkey=Gene;gene_biotype=protein_coding;locus_tag=CD630_07330
gene11995	AM180355.1	917795	918610	+	gene	ID=gene-CD630_07500	ID=gene-CD630_07500;Name=CD630_07500;gbkey=Gene;gene_biotype=protein_coding;locus_tag=CD630_07500
gene11996	AM180355.1	1786707	1787453	+	gene	ID=gene-CD630_15390	ID=gene-CD630_15390;Name=CD630_15390;gbkey=Gene;gene_biotype=protein_coding;locus_tag=CD630_15390
gene11998	AM180355.1	2899741	2900556	-	gene	ID=gene-CD630_25110	ID=gene-CD630_25110;Name=CD630_25110;gbkey=Gene;gene_biotype=protein_coding;locus_tag=CD630_25110
gene12040	AM180355.1	1406560	1407372	+	gene	ID=gene-CD630_12080	ID=gene-CD630_12080;Name=CD630_12080;gbkey=Gene;gene_biotype=protein_coding;locus_tag=CD630_12080
gene12061	AM180355.1	421155	421967	+	gene	ID=gene-CD630_03450	ID=gene-CD630_03450;Name=CD630_03450;gbkey=Gene;gene_biotype=protein_coding;locus_tag=CD630_03450
gene12062	AM180355.1	1421866	1422678	+	gene	ID=gene-CD630_12240	ID=gene-CD630_12240;Name=pupG;gbkey=Gene;gene=pupG;gene_biotype=protein_coding;locus_tag=CD630_12240
gene12063	AM180355.1	1863245	1864060	+	gene	ID=gene-CD630_16100	ID=gene-CD630_16100;Name=CD630_16100;gbkey=Gene;gene_biotype=protein_coding;locus_tag=CD630_16100
gene12064	AM180355.1	2004657	2005469	-	gene	ID=gene-CD630_17300	ID=gene-CD630_17300;Name=CD630_17300;gbkey=Gene;gene_biotype=protein_coding;locus_tag=CD630_17300
gene12067	AM180355.1	2684306	2685118	-	gene	ID=gene-CD630_23220	ID=gene-CD630_23220;Name=tkt1;gbkey=Gene;gene=tkt1;gene_biotype=protein_coding;locus_tag=CD630_23220
gene12068	AM180355.1	3089779	3090591	+	gene	ID=gene-CD630_26740	ID=gene-CD630_26740;Name=appC;gbkey=Gene;gene=appC;gene_biotype=protein_coding;locus_tag=CD630_26740
gene12069	AM180355.1	3612078	3612890	-	gene	ID=gene-CD630_31040	ID=gene-CD630_31040;Name=CD630_31040;gbkey=Gene;gene_biotype=protein_coding;locus_tag=CD630_31040
gene12070	AM180355.1	4221037	4221849	-	gene	ID=gene-CD630_36150	ID=gene-CD630_36150;Name=CD630_36150;gbkey=Gene;gene_biotype=protein_coding;locus_tag=CD630_36150
gene1208	AM180355.1	2562402	2564648	-	gene	ID=gene-CD630_22110	ID=gene-CD630_22110;Name=CD630_22110;gbkey=Gene;gene_biotype=protein_coding;locus_tag=CD630_22110
gene1211	AM180355.1	265952	268186	+	gene	ID=gene-CD630_02040	ID=gene-CD630_02040;Name=CD630_02040;gbkey=Gene;gene_biotype=protein_coding;locus_tag=CD630_02040
gene12147	AM180355.1	1481746	1482531	+	gene	ID=gene-CD630_12750	ID=gene-CD630_12750;Name=codY;gbkey=Gene;gene=codY;gene_biotype=protein_coding;locus_tag=CD630_12750
gene12157	AM180355.1	1673358	1674167	+	gene	ID=gene-CD630_14420	ID=gene-CD630_14420;Name=CD630_14420;gbkey=Gene;gene_biotype=protein_coding;locus_tag=CD630_14420
gene12160	AM180355.1	2947831	2948640	-	gene	ID=gene-CD630_25480	ID=gene-CD630_25480;Name=CD630_25480;gbkey=Gene;gene_biotype=protein_coding;locus_tag=CD630_25480
gene12161	AM180355.1	3349493	3350302	-	gene	ID=gene-CD630_28640	ID=gene-CD630_28640;Name=CD630_28640;gbkey=Gene;gene_biotype=protein_coding;locus_tag=CD630_28640
gene12162	AM180355.1	3564043	3564852	-	gene	ID=gene-CD630_30690	ID=gene-CD630_30690;Name=xynD;gbkey=Gene;gene=xynD;gene_biotype=protein_coding;locus_tag=CD630_30690
gene1221	AM180355.1	3763028	3765268	-	gene	ID=gene-CD630_32170	ID=gene-CD630_32170;Name=CD630_32170;gbkey=Gene;gene_biotype=protein_coding;locus_tag=CD630_32170
gene12241	AM180355.1	889217	890023	+	gene	ID=gene-CD630_07270	ID=gene-CD630_07270;Name=CD630_07270;gbkey=Gene;gene_biotype=protein_coding;locus_tag=CD630_07270
gene12246	AM180355.1	3175193	3175999	-	gene	ID=gene-CD630_27370	ID=gene-CD630_27370;Name=CD630_27370;gbkey=Gene;gene_biotype=protein_coding;locus_tag=CD630_27370
gene12247	AM180355.1	4163763	4164569	-	gene	ID=gene-CD630_35620	ID=gene-CD630_35620;Name=murI;gbkey=Gene;gene=murI;gene_biotype=protein_coding;locus_tag=CD630_35620
gene1225	AM180355.1	671875	674112	+	gene	ID=gene-CD630_05640	ID=gene-CD630_05640;Name=CD630_05640;gbkey=Gene;gene_biotype=protein_coding;locus_tag=CD630_05640
gene12259	AM180355.1	9857	10630	+	gene	ID=gene-CD630_00110	ID=gene-CD630_00110;Name=sigB;gbkey=Gene;gene=sigB;gene_biotype=protein_coding;locus_tag=CD630_00110
gene12267	AM180355.1	2828283	2829080	-	gene	ID=gene-CD630_24520	ID=gene-CD630_24520;Name=CD630_24520;gbkey=Gene;gene_biotype=protein_coding;locus_tag=CD630_24520
gene12290	AM180355.1	2583600	2584391	-	gene	ID=gene-CD630_22320	ID=gene-CD630_22320;Name=asrB;gbkey=Gene;gene=asrB;gene_biotype=protein_coding;locus_tag=CD630_22320
gene1230	AM180355.1	2771822	2774050	+	gene	ID=gene-CD630_24040	ID=gene-CD630_24040;Name=CD630_24040;gbkey=Gene;gene_biotype=protein_coding;locus_tag=CD630_24040
gene12302	AM180355.1	1731904	1732707	+	gene	ID=gene-CD630_14950	ID=gene-CD630_14950;Name=proC;gbkey=Gene;gene=proC;gene_biotype=protein_coding;locus_tag=CD630_14950
gene12306	AM180355.1	2400854	2401648	-	gene	ID=gene-CD630_20800	ID=gene-CD630_20800;Name=CD630_20800;gbkey=Gene;gene_biotype=protein_coding;locus_tag=CD630_20800
gene12322	AM180355.1	646543	647346	+	gene	ID=gene-CD630_05410	ID=gene-CD630_05410;Name=cheR;gbkey=Gene;gene=cheR;gene_biotype=protein_coding;locus_tag=CD630_05410
gene12323	AM180355.1	758061	758873	+	gene	ID=gene-CD630_06350	ID=gene-CD630_06350;Name=CD630_06350;gbkey=Gene;gene_biotype=protein_coding;locus_tag=CD630_06350
gene12324	AM180355.1	923273	924076	+	gene	ID=gene-CD630_07550	ID=gene-CD630_07550;Name=CD630_07550;gbkey=Gene;gene_biotype=protein_coding;locus_tag=CD630_07550
gene12325	AM180355.1	1280584	1281387	+	gene	ID=gene-CD630_10870	ID=gene-CD630_10870;Name=zupT;gbkey=Gene;gene=zupT;gene_biotype=protein_coding;locus_tag=CD630_10870
gene12326	AM180355.1	2055837	2056640	+	gene	ID=gene-CD630_17740	ID=gene-CD630_17740;Name=CD630_17740;gbkey=Gene;gene_biotype=protein_coding;locus_tag=CD630_17740
gene12327	AM180355.1	2060076	2060879	+	gene	ID=gene-CD630_17790	ID=gene-CD630_17790;Name=CD630_17790;gbkey=Gene;gene_biotype=protein_coding;locus_tag=CD630_17790
gene12330	AM180355.1	3841131	3841934	-	gene	ID=gene-CD630_32810	ID=gene-CD630_32810;Name=proC1;gbkey=Gene;gene=proC1;gene_biotype=protein_coding;locus_tag=CD630_32810
gene12394	AM180355.1	2219981	2220742	+	gene	ID=gene-CD630_19190	ID=gene-CD630_19190;Name=eutT;gbkey=Gene;gene=eutT;gene_biotype=protein_coding;locus_tag=CD630_19190
gene12415	AM180355.1	3835897	3836688	-	gene	ID=gene-CD630_32770	ID=gene-CD630_32770;Name=CD630_32770;gbkey=Gene;gene_biotype=protein_coding;locus_tag=CD630_32770
gene12416	AM180355.1	468271	469071	+	gene	ID=gene-CD630_03960	ID=gene-CD630_03960;Name=hadI;gbkey=Gene;gene=hadI;gene_biotype=protein_coding;locus_tag=CD630_03960
gene12417	AM180355.1	1242590	1243390	-	gene	ID=gene-CD630_10490	ID=gene-CD630_10490;Name=ppnK;gbkey=Gene;gene=ppnK;gene_biotype=protein_coding;locus_tag=CD630_10490
gene12418	AM180355.1	2205211	2206011	-	gene	ID=gene-CD630_19040	ID=gene-CD630_19040;Name=CD630_19040;gbkey=Gene;gene_biotype=protein_coding;locus_tag=CD630_19040
gene12420	AM180355.1	3765796	3766596	-	gene	ID=gene-CD630_32180	ID=gene-CD630_32180;Name=CD630_32180;gbkey=Gene;gene_biotype=protein_coding;locus_tag=CD630_32180
gene12421	AM180355.1	3835104	3835910	-	gene	ID=gene-CD630_32760	ID=gene-CD630_32760;Name=CD630_32760;gbkey=Gene;gene_biotype=protein_coding;locus_tag=CD630_32760
gene1243	AM180355.1	929058	931289	-	gene	ID=gene-CD630_07590	ID=gene-CD630_07590;Name=plfB;gbkey=Gene;gene=plfB;gene_biotype=protein_coding;locus_tag=CD630_07590
gene12478	AM180355.1	848362	849042	+	gene	ID=gene-CD630_06980	ID=gene-CD630_06980;Name=CD630_06980;gbkey=Gene;gene_biotype=protein_coding;locus_tag=CD630_06980
gene12479	AM180355.1	1249945	1250742	+	gene	ID=gene-CD630_10570	ID=gene-CD630_10570;Name=crt2;gbkey=Gene;gene=crt2;gene_biotype=protein_coding;locus_tag=CD630_10570
gene12480	AM180355.1	1349385	1350182	+	gene	ID=gene-CD630_11500	ID=gene-CD630_11500;Name=minD;gbkey=Gene;gene=minD;gene_biotype=protein_coding;locus_tag=CD630_11500
gene12481	AM180355.1	1824166	1824963	+	gene	ID=gene-CD630_15750	ID=gene-CD630_15750;Name=CD630_15750;gbkey=Gene;gene_biotype=protein_coding;locus_tag=CD630_15750
gene12483	AM180355.1	4112298	4113095	-	gene	ID=gene-CD630_35190	ID=gene-CD630_35190;Name=CD630_35190;gbkey=Gene;gene_biotype=protein_coding;locus_tag=CD630_35190
gene12484	AM180355.1	4260587	4261384	-	gene	ID=gene-CD630_36510	ID=gene-CD630_36510;Name=CD630_36510;gbkey=Gene;gene_biotype=protein_coding;locus_tag=CD630_36510
gene12497	AM180355.1	617747	618508	+	gene	ID=gene-CD630_05170	ID=gene-CD630_05170;Name=CD630_05170;gbkey=Gene;gene_biotype=protein_coding;locus_tag=CD630_05170
gene12504	AM180355.1	972321	973103	+	gene	ID=gene-CD630_08000	ID=gene-CD630_08000;Name=crt1;gbkey=Gene;gene=crt1;gene_biotype=protein_coding;locus_tag=CD630_08000
gene12524	AM180355.1	2498152	2498937	-	gene	ID=gene-CD630_21590	ID=gene-CD630_21590;Name=CD630_21590;gbkey=Gene;gene_biotype=protein_coding;locus_tag=CD630_21590
gene12544	AM180355.1	977100	977894	+	gene	ID=gene-CD630_08040	ID=gene-CD630_08040;Name=etfB2;gbkey=Gene;gene=etfB2;gene_biotype=protein_coding;locus_tag=CD630_08040
gene12546	AM180355.1	1262955	1263749	-	gene	ID=gene-CD630_10690	ID=gene-CD630_10690;Name=CD630_10690;gbkey=Gene;gene_biotype=protein_coding;locus_tag=CD630_10690
gene12547	AM180355.1	1615949	1616743	-	gene	ID=gene-CD630_13960	ID=gene-CD630_13960;Name=CD630_13960;gbkey=Gene;gene_biotype=protein_coding;locus_tag=CD630_13960
gene12548	AM180355.1	1741906	1742700	+	gene	ID=gene-CD630_15050	ID=gene-CD630_15050;Name=CD630_15050;gbkey=Gene;gene_biotype=protein_coding;locus_tag=CD630_15050
gene12549	AM180355.1	1854776	1855570	+	gene	ID=gene-CD630_15990	ID=gene-CD630_15990;Name=thiD;gbkey=Gene;gene=thiD;gene_biotype=protein_coding;locus_tag=CD630_15990
gene12550	AM180355.1	1868198	1868992	+	gene	ID=gene-CD630_16140	ID=gene-CD630_16140;Name=CD630_16140;gbkey=Gene;gene_biotype=protein_coding;locus_tag=CD630_16140
gene12551	AM180355.1	2391212	2392006	-	gene	ID=gene-CD630_20740	ID=gene-CD630_20740;Name=CD630_20740;gbkey=Gene;gene_biotype=protein_coding;locus_tag=CD630_20740
gene1256	AM180355.1	1703071	1705290	-	gene	ID=gene-CD630_14710	ID=gene-CD630_14710;Name=CD630_14710;gbkey=Gene;gene_biotype=protein_coding;locus_tag=CD630_14710
gene1261	AM180355.1	2408777	2410993	-	gene	ID=gene-CD630_20870	ID=gene-CD630_20870;Name=CD630_20870;gbkey=Gene;gene_biotype=protein_coding;locus_tag=CD630_20870
gene12619	AM180355.1	1602942	1603733	+	gene	ID=gene-CD630_13840	ID=gene-CD630_13840;Name=CD630_13840;gbkey=Gene;gene_biotype=protein_coding;locus_tag=CD630_13840
gene12620	AM180355.1	1680199	1681002	+	gene	ID=gene-CD630_14500	ID=gene-CD630_14500;Name=folP;gbkey=Gene;gene=folP;gene_biotype=protein_coding;locus_tag=CD630_14500
gene12621	AM180355.1	1726001	1726792	+	gene	ID=gene-CD630_14910	ID=gene-CD630_14910;Name=metQ;gbkey=Gene;gene=metQ;gene_biotype=protein_coding;locus_tag=CD630_14910
gene12622	AM180355.1	1905390	1906181	+	gene	ID=gene-CD630_16430	ID=gene-CD630_16430;Name=CD630_16430;gbkey=Gene;gene_biotype=protein_coding;locus_tag=CD630_16430
gene12623	AM180355.1	2264008	2264799	-	gene	ID=gene-CD630_19630	ID=gene-CD630_19630;Name=CD630_19630;gbkey=Gene;gene_biotype=protein_coding;locus_tag=CD630_19630
gene12624	AM180355.1	2674009	2674800	+	gene	ID=gene-CD630_23120	ID=gene-CD630_23120;Name=CD630_23120;gbkey=Gene;gene_biotype=protein_coding;locus_tag=CD630_23120
gene12692	AM180355.1	908100	908888	+	gene	ID=gene-CD630_07440	ID=gene-CD630_07440;Name=CD630_07440;gbkey=Gene;gene_biotype=protein_coding;locus_tag=CD630_07440
gene12693	AM180355.1	1370023	1370820	+	gene	ID=gene-CD630_11710	ID=gene-CD630_11710;Name=etfB4;gbkey=Gene;gene=etfB4;gene_biotype=protein_coding;locus_tag=CD630_11710
gene12694	AM180355.1	1855594	1856382	+	gene	ID=gene-CD630_16000	ID=gene-CD630_16000;Name=thiM;gbkey=Gene;gene=thiM;gene_biotype=protein_coding;locus_tag=CD630_16000
gene12695	AM180355.1	2201141	2201929	-	gene	ID=gene-CD630_18980	ID=gene-CD630_18980;Name=CD630_18980;gbkey=Gene;gene_biotype=protein_coding;locus_tag=CD630_18980
gene12696	AM180355.1	3164309	3165097	+	gene	ID=gene-CD630_27270	ID=gene-CD630_27270;Name=CD630_27270;gbkey=Gene;gene_biotype=protein_coding;locus_tag=CD630_27270
gene1270	AM180355.1	177257	179476	+	gene	ID=gene-CD630_01320	ID=gene-CD630_01320;Name=CD630_01320;gbkey=Gene;gene_biotype=protein_coding;locus_tag=CD630_01320
gene1271	AM180355.1	1221251	1223470	+	gene	ID=gene-CD630_10380	ID=gene-CD630_10380;Name=CD630_10380;gbkey=Gene;gene_biotype=protein_coding;locus_tag=CD630_10380
gene1272	AM180355.1	1784341	1786560	+	gene	ID=gene-CD630_15380	ID=gene-CD630_15380;Name=CD630_15380;gbkey=Gene;gene_biotype=protein_coding;locus_tag=CD630_15380
gene12725	AM180355.1	3981100	3981870	-	gene	ID=gene-CD630_34030	ID=gene-CD630_34030;Name=CD630_34030;gbkey=Gene;gene_biotype=protein_coding;locus_tag=CD630_34030
gene1273	AM180355.1	3442724	3444943	-	gene	ID=gene-CD630_29650	ID=gene-CD630_29650;Name=CD630_29650;gbkey=Gene;gene_biotype=protein_coding;locus_tag=CD630_29650
gene12735	AM180355.1	1641497	1642165	+	gene	ID=gene-CD630_14170	ID=gene-CD630_14170;Name=CD630_14170;gbkey=Gene;gene_biotype=protein_coding;locus_tag=CD630_14170
gene12741	AM180355.1	1169889	1170674	+	gene	ID=gene-CD630_10000	ID=gene-CD630_10000;Name=CD630_10000;gbkey=Gene;gene_biotype=protein_coding;locus_tag=CD630_10000
gene12748	AM180355.1	1835156	1835908	-	gene	ID=gene-CD630_15830	ID=gene-CD630_15830;Name=CD630_15830;gbkey=Gene;gene_biotype=protein_coding;locus_tag=CD630_15830
gene12753	AM180355.1	472653	473438	+	gene	ID=gene-CD630_04000	ID=gene-CD630_04000;Name=etfB1;gbkey=Gene;gene=etfB1;gene_biotype=protein_coding;locus_tag=CD630_04000
gene12754	AM180355.1	1656627	1657412	+	gene	ID=gene-CD630_14290	ID=gene-CD630_14290;Name=CD630_14290;gbkey=Gene;gene_biotype=protein_coding;locus_tag=CD630_14290
gene12755	AM180355.1	1681858	1682643	+	gene	ID=gene-CD630_14530	ID=gene-CD630_14530;Name=aroF;gbkey=Gene;gene=aroF;gene_biotype=protein_coding;locus_tag=CD630_14530
gene12756	AM180355.1	3332630	3333415	-	gene	ID=gene-CD630_28500	ID=gene-CD630_28500;Name=CD630_28500;gbkey=Gene;gene_biotype=protein_coding;locus_tag=CD630_28500
gene12757	AM180355.1	3555936	3556721	-	gene	ID=gene-CD630_30620	ID=gene-CD630_30620;Name=CD630_30620;gbkey=Gene;gene_biotype=protein_coding;locus_tag=CD630_30620
gene12758	AM180355.1	4282275	4283060	-	gene	ID=gene-CD630_36730	ID=gene-CD630_36730;Name=CD630_36730;gbkey=Gene;gene_biotype=protein_coding;locus_tag=CD630_36730
gene12821	AM180355.1	179479	180261	+	gene	ID=gene-CD630_01330	ID=gene-CD630_01330;Name=CD630_01330;gbkey=Gene;gene_biotype=protein_coding;locus_tag=CD630_01330
gene12822	AM180355.1	999148	999930	+	gene	ID=gene-CD630_08240	ID=gene-CD630_08240;Name=CD630_08240;gbkey=Gene;gene_biotype=protein_coding;locus_tag=CD630_08240
gene12823	AM180355.1	1248115	1248897	+	gene	ID=gene-CD630_10550	ID=gene-CD630_10550;Name=etfB3;gbkey=Gene;gene=etfB3;gene_biotype=protein_coding;locus_tag=CD630_10550
gene12825	AM180355.1	2553397	2554179	-	gene	ID=gene-CD630_22040	ID=gene-CD630_22040;Name=CD630_22040;gbkey=Gene;gene_biotype=protein_coding;locus_tag=CD630_22040
gene12826	AM180355.1	3364140	3364922	-	gene	ID=gene-CD630_28750	ID=gene-CD630_28750;Name=fhuC;gbkey=Gene;gene=fhuC;gene_biotype=protein_coding;locus_tag=CD630_28750
gene12827	AM180355.1	3474354	3475136	-	gene	ID=gene-CD630_29910	ID=gene-CD630_29910;Name=ssuC2;gbkey=Gene;gene=ssuC2;gene_biotype=protein_coding;locus_tag=CD630_29910
gene12828	AM180355.1	3635863	3636645	-	gene	ID=gene-CD630_31230	ID=gene-CD630_31230;Name=CD630_31230;gbkey=Gene;gene_biotype=protein_coding;locus_tag=CD630_31230
gene12871	AM180355.1	1495736	1496473	-	gene	ID=gene-CD630_12880	ID=gene-CD630_12880;Name=CD630_12880;gbkey=Gene;gene_biotype=protein_coding;locus_tag=CD630_12880
gene12887	AM180355.1	2440349	2441113	+	gene	ID=gene-CD630_21110	ID=gene-CD630_21110;Name=CD630_21110;gbkey=Gene;gene_biotype=protein_coding;locus_tag=CD630_21110
gene12919	AM180355.1	838776	839555	+	gene	ID=gene-CD630_06910	ID=gene-CD630_06910;Name=CD630_06910;gbkey=Gene;gene_biotype=protein_coding;locus_tag=CD630_06910
gene12920	AM180355.1	899092	899871	+	gene	ID=gene-CD630_07370	ID=gene-CD630_07370;Name=hisK;gbkey=Gene;gene=hisK;gene_biotype=protein_coding;locus_tag=CD630_07370
gene12921	AM180355.1	1634628	1635407	+	gene	ID=gene-CD630_14100	ID=gene-CD630_14100;Name=CD630_14100;gbkey=Gene;gene_biotype=protein_coding;locus_tag=CD630_14100
gene12923	AM180355.1	3453760	3454539	+	gene	ID=gene-CD630_29720	ID=gene-CD630_29720;Name=CD630_29720;gbkey=Gene;gene_biotype=protein_coding;locus_tag=CD630_29720
gene12924	AM180355.1	3564845	3565624	-	gene	ID=gene-CD630_30700	ID=gene-CD630_30700;Name=xynC;gbkey=Gene;gene=xynC;gene_biotype=protein_coding;locus_tag=CD630_30700
gene12927	AM180355.1	568645	569421	+	gene	ID=gene-CD630_04800	ID=gene-CD630_04800;Name=spaG;gbkey=Gene;gene=spaG;gene_biotype=protein_coding;locus_tag=CD630_04800
gene12976	AM180355.1	4133568	4134338	-	gene	ID=gene-CD630_35390	ID=gene-CD630_35390;Name=CD630_35390;gbkey=Gene;gene_biotype=protein_coding;locus_tag=CD630_35390
gene12998	AM180355.1	1558097	1558672	-	gene	ID=gene-CD630_13420	ID=gene-CD630_13420;Name=CD630_13420;gbkey=Gene;gene_biotype=protein_coding;locus_tag=CD630_13420
gene12999	AM180355.1	2581783	2582559	-	gene	ID=gene-CD630_22300	ID=gene-CD630_22300;Name=CD630_22300;gbkey=Gene;gene_biotype=protein_coding;locus_tag=CD630_22300
gene13000	AM180355.1	2852646	2853422	-	gene	ID=gene-CD630_24710	ID=gene-CD630_24710;Name=CD630_24710;gbkey=Gene;gene_biotype=protein_coding;locus_tag=CD630_24710
gene13001	AM180355.1	3094677	3095453	+	gene	ID=gene-CD630_26790	ID=gene-CD630_26790;Name=bdhA;gbkey=Gene;gene=bdhA;gene_biotype=protein_coding;locus_tag=CD630_26790
gene13002	AM180355.1	3490365	3491141	+	gene	ID=gene-CD630_30050	ID=gene-CD630_30050;Name=CD630_30050;gbkey=Gene;gene_biotype=protein_coding;locus_tag=CD630_30050
gene13032	AM180355.1	4155927	4156697	-	gene	ID=gene-CD630_35550	ID=gene-CD630_35550;Name=coaX;gbkey=Gene;gene=coaX;gene_biotype=protein_coding;locus_tag=CD630_35550
gene13038	AM180355.1	1533436	1534170	+	gene	ID=gene-CD630_13230	ID=gene-CD630_13230;Name=tepA;gbkey=Gene;gene=tepA;gene_biotype=protein_coding;locus_tag=CD630_13230
gene13055	AM180355.1	943319	944083	+	gene	ID=gene-CD630_07720	ID=gene-CD630_07720;Name=sigF;gbkey=Gene;gene=sigF;gene_biotype=protein_coding;locus_tag=CD630_07720
gene13062	AM180355.1	3049792	3050565	-	gene	ID=gene-CD630_26420	ID=gene-CD630_26420;Name=sigG;gbkey=Gene;gene=sigG;gene_biotype=protein_coding;locus_tag=CD630_26420
gene13063	AM180355.1	4028256	4029029	-	gene	ID=gene-CD630_34370	ID=gene-CD630_34370;Name=cobS;gbkey=Gene;gene=cobS;gene_biotype=protein_coding;locus_tag=CD630_34370
gene13064	AM180355.1	4281367	4282140	-	gene	ID=gene-CD630_36720	ID=gene-CD630_36720;Name=soj;gbkey=Gene;gene=soj;gene_biotype=protein_coding;locus_tag=CD630_36720
gene13077	AM180355.1	3050657	3051379	-	gene	ID=gene-CD630_26430	ID=gene-CD630_26430;Name=sigE;gbkey=Gene;gene=sigE;gene_biotype=protein_coding;locus_tag=CD630_26430
gene1309	AM180355.1	3183567	3185774	-	gene	ID=gene-CD630_27440	ID=gene-CD630_27440;Name=relA;gbkey=Gene;gene=relA;gene_biotype=protein_coding;locus_tag=CD630_27440
gene13122	AM180355.1	567878	568648	+	gene	ID=gene-CD630_04790	ID=gene-CD630_04790;Name=spaE;gbkey=Gene;gene=spaE;gene_biotype=protein_coding;locus_tag=CD630_04790
gene13123	AM180355.1	886035	886805	+	gene	ID=gene-CD630_07240	ID=gene-CD630_07240;Name=CD630_07240;gbkey=Gene;gene_biotype=protein_coding;locus_tag=CD630_07240
gene13124	AM180355.1	1483934	1484704	+	gene	ID=gene-CD630_12770	ID=gene-CD630_12770;Name=CD630_12770;gbkey=Gene;gene_biotype=protein_coding;locus_tag=CD630_12770
gene13125	AM180355.1	1718131	1718901	+	gene	ID=gene-CD630_14820	ID=gene-CD630_14820;Name=ssuC;gbkey=Gene;gene=ssuC;gene_biotype=protein_coding;locus_tag=CD630_14820
gene13126	AM180355.1	1978774	1979544	+	gene	ID=gene-CD630_17040	ID=gene-CD630_17040;Name=thiG;gbkey=Gene;gene=thiG;gene_biotype=protein_coding;locus_tag=CD630_17040
gene13127	AM180355.1	2284036	2284806	-	gene	ID=gene-CD630_19800	ID=gene-CD630_19800;Name=CD630_19800;gbkey=Gene;gene_biotype=protein_coding;locus_tag=CD630_19800
gene13128	AM180355.1	3009302	3010072	-	gene	ID=gene-CD630_26010	ID=gene-CD630_26010;Name=CD630_26010;gbkey=Gene;gene_biotype=protein_coding;locus_tag=CD630_26010
gene13129	AM180355.1	3588804	3589574	-	gene	ID=gene-CD630_30880	ID=gene-CD630_30880;Name=CD630_30880;gbkey=Gene;gene_biotype=protein_coding;locus_tag=CD630_30880
gene1313	AM180355.1	2519352	2521529	-	gene	ID=gene-CD630_21790	ID=gene-CD630_21790;Name=CD630_21790;gbkey=Gene;gene_biotype=protein_coding;locus_tag=CD630_21790
gene1314	AM180355.1	529334	531538	+	gene	ID=gene-CD630_04460	ID=gene-CD630_04460;Name=oraE;gbkey=Gene;gene=oraE;gene_biotype=protein_coding;locus_tag=CD630_04460
gene13200	AM180355.1	1468065	1468832	+	gene	ID=gene-CD630_12620	ID=gene-CD630_12620;Name=rnhB;gbkey=Gene;gene=rnhB;gene_biotype=protein_coding;locus_tag=CD630_12620
gene13201	AM180355.1	1775549	1776316	+	gene	ID=gene-CD630_15320	ID=gene-CD630_15320;Name=CD630_15320;gbkey=Gene;gene_biotype=protein_coding;locus_tag=CD630_15320
gene13202	AM180355.1	2568567	2569334	-	gene	ID=gene-CD630_22170	ID=gene-CD630_22170;Name=aroD;gbkey=Gene;gene=aroD;gene_biotype=protein_coding;locus_tag=CD630_22170
gene13203	AM180355.1	2805418	2806185	-	gene	ID=gene-CD630_24300	ID=gene-CD630_24300;Name=CD630_24300;gbkey=Gene;gene_biotype=protein_coding;locus_tag=CD630_24300
gene13204	AM180355.1	2834224	2834991	+	gene	ID=gene-CD630_24570	ID=gene-CD630_24570;Name=CD630_24570;gbkey=Gene;gene_biotype=protein_coding;locus_tag=CD630_24570
gene1322	AM180355.1	1491712	1493883	+	gene	ID=gene-CD630_12840	ID=gene-CD630_12840;Name=CD630_12840;gbkey=Gene;gene_biotype=protein_coding;locus_tag=CD630_12840
gene13239	AM180355.1	273810	274523	+	gene	ID=gene-CD630_02100	ID=gene-CD630_02100;Name=CD630_02100;gbkey=Gene;gene_biotype=protein_coding;locus_tag=CD630_02100
gene13241	AM180355.1	995689	996381	+	gene	ID=gene-CD630_08200	ID=gene-CD630_08200;Name=CD630_08200;gbkey=Gene;gene_biotype=protein_coding;locus_tag=CD630_08200
gene13251	AM180355.1	582611	583369	+	gene	ID=gene-CD630_04930	ID=gene-CD630_04930;Name=CD630_04930;gbkey=Gene;gene_biotype=protein_coding;locus_tag=CD630_04930
gene13275	AM180355.1	1997181	1997945	-	gene	ID=gene-CD630_17230	ID=gene-CD630_17230;Name=CD630_17230;gbkey=Gene;gene_biotype=protein_coding;locus_tag=CD630_17230
gene13276	AM180355.1	2525274	2526038	-	gene	ID=gene-CD630_21810	ID=gene-CD630_21810;Name=CD630_21810;gbkey=Gene;gene_biotype=protein_coding;locus_tag=CD630_21810
gene13277	AM180355.1	3803254	3804018	-	gene	ID=gene-CD630_32480	ID=gene-CD630_32480;Name=CD630_32480;gbkey=Gene;gene_biotype=protein_coding;locus_tag=CD630_32480
gene13278	AM180355.1	3818665	3819429	-	gene	ID=gene-CD630_32610	ID=gene-CD630_32610;Name=pstB;gbkey=Gene;gene=pstB;gene_biotype=protein_coding;locus_tag=CD630_32610
gene13312	AM180355.1	3768145	3768891	-	gene	ID=gene-CD630_32200	ID=gene-CD630_32200;Name=CD630_32200;gbkey=Gene;gene_biotype=protein_coding;locus_tag=CD630_32200
gene13324	AM180355.1	1177160	1177894	+	gene	ID=gene-CD630_10090	ID=gene-CD630_10090;Name=CD630_10090;gbkey=Gene;gene_biotype=protein_coding;locus_tag=CD630_10090
gene13339	AM180355.1	680082	680843	+	gene	ID=gene-CD630_05710	ID=gene-CD630_05710;Name=CD630_05710;gbkey=Gene;gene_biotype=protein_coding;locus_tag=CD630_05710
gene13340	AM180355.1	998377	999138	+	gene	ID=gene-CD630_08230	ID=gene-CD630_08230;Name=CD630_08230;gbkey=Gene;gene_biotype=protein_coding;locus_tag=CD630_08230
gene13345	AM180355.1	3760302	3761063	-	gene	ID=gene-CD630_32150	ID=gene-CD630_32150;Name=CD630_32150;gbkey=Gene;gene_biotype=protein_coding;locus_tag=CD630_32150
gene13415	AM180355.1	1269612	1270376	+	gene	ID=gene-CD630_10770	ID=gene-CD630_10770;Name=CD630_10770;gbkey=Gene;gene_biotype=protein_coding;locus_tag=CD630_10770
gene13417	AM180355.1	1800363	1801121	+	gene	ID=gene-CD630_15530	ID=gene-CD630_15530;Name=hisF;gbkey=Gene;gene=hisF;gene_biotype=protein_coding;locus_tag=CD630_15530
gene13418	AM180355.1	2823683	2824441	-	gene	ID=gene-CD630_24490	ID=gene-CD630_24490;Name=CD630_24490;gbkey=Gene;gene_biotype=protein_coding;locus_tag=CD630_24490
gene13419	AM180355.1	3048184	3048945	-	gene	ID=gene-CD630_26390	ID=gene-CD630_26390;Name=CD630_26390;gbkey=Gene;gene_biotype=protein_coding;locus_tag=CD630_26390
gene13420	AM180355.1	3791857	3792615	-	gene	ID=gene-CD630_32400	ID=gene-CD630_32400;Name=prdD;gbkey=Gene;gene=prdD;gene_biotype=protein_coding;locus_tag=CD630_32400
gene13464	AM180355.1	4017599	4018351	-	gene	ID=gene-CD630_34260	ID=gene-CD630_34260;Name=cbiF;gbkey=Gene;gene=cbiF;gene_biotype=protein_coding;locus_tag=CD630_34260
gene1347	AM180355.1	2637957	2640077	-	gene	ID=gene-CD630_22750	ID=gene-CD630_22750;Name=topB2;gbkey=Gene;gene=topB2;gene_biotype=protein_coding;locus_tag=CD630_22750
gene1348	AM180355.1	1622771	1624960	+	gene	ID=gene-CD630_14030	ID=gene-CD630_14030;Name=CD630_14030;gbkey=Gene;gene_biotype=protein_coding;locus_tag=CD630_14030
gene13498	AM180355.1	348576	349331	+	gene	ID=gene-CD630_02880	ID=gene-CD630_02880;Name=CD630_02880;gbkey=Gene;gene_biotype=protein_coding;locus_tag=CD630_02880
gene13499	AM180355.1	661938	662693	+	gene	ID=gene-CD630_05560	ID=gene-CD630_05560;Name=CD630_05560;gbkey=Gene;gene_biotype=protein_coding;locus_tag=CD630_05560
gene13500	AM180355.1	965121	965876	+	gene	ID=gene-CD630_07940	ID=gene-CD630_07940;Name=nadE;gbkey=Gene;gene=nadE;gene_biotype=protein_coding;locus_tag=CD630_07940
gene13503	AM180355.1	1573137	1573892	-	gene	ID=gene-CD630_13570	ID=gene-CD630_13570;Name=CD630_13570;gbkey=Gene;gene_biotype=protein_coding;locus_tag=CD630_13570
gene13505	AM180355.1	1911442	1912197	+	gene	ID=gene-CD630_16490	ID=gene-CD630_16490;Name=CD630_16490;gbkey=Gene;gene_biotype=protein_coding;locus_tag=CD630_16490
gene13509	AM180355.1	3779042	3779797	+	gene	ID=gene-CD630_32290	ID=gene-CD630_32290;Name=dapB2;gbkey=Gene;gene=dapB2;gene_biotype=protein_coding;locus_tag=CD630_32290
gene13552	AM180355.1	4180049	4180792	-	gene	ID=gene-CD630_35800	ID=gene-CD630_35800;Name=CD630_35800;gbkey=Gene;gene_biotype=protein_coding;locus_tag=CD630_35800
gene13572	AM180355.1	160290	161042	+	gene	ID=gene-CD630_01170	ID=gene-CD630_01170;Name=CD630_01170;gbkey=Gene;gene_biotype=protein_coding;locus_tag=CD630_01170
gene13574	AM180355.1	397788	398540	+	gene	ID=gene-CD630_03300	ID=gene-CD630_03300;Name=CD630_03300;gbkey=Gene;gene_biotype=protein_coding;locus_tag=CD630_03300
gene13576	AM180355.1	1267223	1267948	+	gene	ID=gene-CD630_10730	ID=gene-CD630_10730;Name=CD630_10730;gbkey=Gene;gene_biotype=protein_coding;locus_tag=CD630_10730
gene13578	AM180355.1	1557253	1558005	+	gene	ID=gene-CD630_13410	ID=gene-CD630_13410;Name=exoA;gbkey=Gene;gene=exoA;gene_biotype=protein_coding;locus_tag=CD630_13410
gene13579	AM180355.1	2729905	2730657	-	gene	ID=gene-CD630_23610	ID=gene-CD630_23610;Name=CD630_23610;gbkey=Gene;gene_biotype=protein_coding;locus_tag=CD630_23610
gene13580	AM180355.1	2983804	2984556	-	gene	ID=gene-CD630_25790	ID=gene-CD630_25790;Name=stp;gbkey=Gene;gene=stp;gene_biotype=protein_coding;locus_tag=CD630_25790
gene13581	AM180355.1	2987772	2988524	-	gene	ID=gene-CD630_25830	ID=gene-CD630_25830;Name=CD630_25830;gbkey=Gene;gene_biotype=protein_coding;locus_tag=CD630_25830
gene13583	AM180355.1	3524014	3524766	+	gene	ID=gene-CD630_30340	ID=gene-CD630_30340;Name=CD630_30340;gbkey=Gene;gene_biotype=protein_coding;locus_tag=CD630_30340
gene13584	AM180355.1	3549650	3550402	-	gene	ID=gene-CD630_30560	ID=gene-CD630_30560;Name=CD630_30560;gbkey=Gene;gene_biotype=protein_coding;locus_tag=CD630_30560
gene13585	AM180355.1	3574106	3574858	-	gene	ID=gene-CD630_30770	ID=gene-CD630_30770;Name=CD630_30770;gbkey=Gene;gene_biotype=protein_coding;locus_tag=CD630_30770
gene13587	AM180355.1	4015023	4015775	-	gene	ID=gene-CD630_34230	ID=gene-CD630_34230;Name=cbiJ;gbkey=Gene;gene=cbiJ;gene_biotype=protein_coding;locus_tag=CD630_34230
gene13668	AM180355.1	1046780	1047463	+	gene	ID=gene-CD630_08700	ID=gene-CD630_08700;Name=modB;gbkey=Gene;gene=modB;gene_biotype=protein_coding;locus_tag=CD630_08700
gene13684	AM180355.1	1179136	1179885	+	gene	ID=gene-CD630_10110	ID=gene-CD630_10110;Name=nagB;gbkey=Gene;gene=nagB;gene_biotype=protein_coding;locus_tag=CD630_10110
gene13685	AM180355.1	1382288	1383037	+	gene	ID=gene-CD630_11820	ID=gene-CD630_11820;Name=fabG;gbkey=Gene;gene=fabG;gene_biotype=protein_coding;locus_tag=CD630_11820
gene13686	AM180355.1	1857544	1858299	-	gene	ID=gene-CD630_16030	ID=gene-CD630_16030;Name=CD630_16030;gbkey=Gene;gene_biotype=protein_coding;locus_tag=CD630_16030
gene13688	AM180355.1	3225022	3225771	-	gene	ID=gene-CD630_27740	ID=gene-CD630_27740;Name=CD630_27740;gbkey=Gene;gene_biotype=protein_coding;locus_tag=CD630_27740
gene13689	AM180355.1	3634567	3635316	+	gene	ID=gene-CD630_31210	ID=gene-CD630_31210;Name=CD630_31210;gbkey=Gene;gene_biotype=protein_coding;locus_tag=CD630_31210
gene13690	AM180355.1	3775472	3776221	+	gene	ID=gene-CD630_32260	ID=gene-CD630_32260;Name=dapB1;gbkey=Gene;gene=dapB1;gene_biotype=protein_coding;locus_tag=CD630_32260
gene13733	AM180355.1	2355598	2356296	+	gene	ID=gene-CD630_20430	ID=gene-CD630_20430;Name=CD630_20430;gbkey=Gene;gene_biotype=protein_coding;locus_tag=CD630_20430
gene13745	AM180355.1	3068465	3069211	-	gene	ID=gene-CD630_26590	ID=gene-CD630_26590;Name=lgt;gbkey=Gene;gene=lgt;gene_biotype=protein_coding;locus_tag=CD630_26590
gene13748	AM180355.1	3742649	3743395	+	gene	ID=gene-CD630_31970	ID=gene-CD630_31970;Name=CD630_31970;gbkey=Gene;gene_biotype=protein_coding;locus_tag=CD630_31970
gene13749	AM180355.1	4141598	4142344	-	gene	ID=gene-CD630_35470	ID=gene-CD630_35470;Name=CD630_35470;gbkey=Gene;gene_biotype=protein_coding;locus_tag=CD630_35470
gene13777	AM180355.1	1814421	1815098	+	gene	ID=gene-CD630_15670	ID=gene-CD630_15670;Name=cotG;gbkey=Gene;gene=cotG;gene_biotype=protein_coding;locus_tag=CD630_15670
gene13801	AM180355.1	366059	366802	+	gene	ID=gene-CD630_03040	ID=gene-CD630_03040;Name=CD630_03040;gbkey=Gene;gene_biotype=protein_coding;locus_tag=CD630_03040
gene13802	AM180355.1	1268388	1269131	+	gene	ID=gene-CD630_10750	ID=gene-CD630_10750;Name=CD630_10750;gbkey=Gene;gene_biotype=protein_coding;locus_tag=CD630_10750
gene13803	AM180355.1	1529662	1530405	+	gene	ID=gene-CD630_13190	ID=gene-CD630_13190;Name=CD630_13190;gbkey=Gene;gene_biotype=protein_coding;locus_tag=CD630_13190
gene13804	AM180355.1	1678071	1678814	+	gene	ID=gene-CD630_14470	ID=gene-CD630_14470;Name=pabC;gbkey=Gene;gene=pabC;gene_biotype=protein_coding;locus_tag=CD630_14470
gene13807	AM180355.1	3706953	3707696	-	gene	ID=gene-CD630_31720	ID=gene-CD630_31720;Name=tpi;gbkey=Gene;gene=tpi;gene_biotype=protein_coding;locus_tag=CD630_31720
gene13831	AM180355.1	3158674	3159378	-	gene	ID=gene-CD630_27220	ID=gene-CD630_27220;Name=CD630_27220;gbkey=Gene;gene_biotype=protein_coding;locus_tag=CD630_27220
gene13871	AM180355.1	254150	254890	+	gene	ID=gene-CD630_01950	ID=gene-CD630_01950;Name=CD630_01950;gbkey=Gene;gene_biotype=protein_coding;locus_tag=CD630_01950
gene13874	AM180355.1	908903	909649	+	gene	ID=gene-CD630_07450	ID=gene-CD630_07450;Name=CD630_07450;gbkey=Gene;gene_biotype=protein_coding;locus_tag=CD630_07450
gene13875	AM180355.1	2025082	2025822	+	gene	ID=gene-CD630_17480	ID=gene-CD630_17480;Name=CD630_17480;gbkey=Gene;gene_biotype=protein_coding;locus_tag=CD630_17480
gene13876	AM180355.1	2545884	2546624	-	gene	ID=gene-CD630_21980	ID=gene-CD630_21980;Name=CD630_21980;gbkey=Gene;gene_biotype=protein_coding;locus_tag=CD630_21980
gene13877	AM180355.1	2634371	2635111	-	gene	ID=gene-CD630_22720	ID=gene-CD630_22720;Name=CD630_22720;gbkey=Gene;gene_biotype=protein_coding;locus_tag=CD630_22720
gene13880	AM180355.1	4250363	4251103	-	gene	ID=gene-CD630_36410	ID=gene-CD630_36410;Name=CD630_36410;gbkey=Gene;gene_biotype=protein_coding;locus_tag=CD630_36410
gene13884	AM180355.1	3057322	3058062	-	gene	ID=gene-CD630_26500	ID=gene-CD630_26500;Name=CD630_26500;gbkey=Gene;gene_biotype=protein_coding;locus_tag=CD630_26500
gene13906	AM180355.1	254974	256157	+	pseudogene	ID=gene-CD630_01960	ID=gene-CD630_01960;Name=CD630_01960;gbkey=Gene;gene_biotype=pseudogene;locus_tag=CD630_01960;pseudo=true;pseudogene=unknown
gene13957	AM180355.1	167424	168161	+	gene	ID=gene-CD630_01220	ID=gene-CD630_01220;Name=CD630_01220;gbkey=Gene;gene_biotype=protein_coding;locus_tag=CD630_01220
gene13960	AM180355.1	807044	807781	-	gene	ID=gene-CD630_06650	ID=gene-CD630_06650;Name=cdd2;gbkey=Gene;gene=cdd2;gene_biotype=protein_coding;locus_tag=CD630_06650
gene13961	AM180355.1	1508775	1509512	-	gene	ID=gene-CD630_13030	ID=gene-CD630_13030;Name=npdA;gbkey=Gene;gene=npdA;gene_biotype=protein_coding;locus_tag=CD630_13030
gene13962	AM180355.1	2065799	2066536	+	gene	ID=gene-CD630_17840	ID=gene-CD630_17840;Name=truA2;gbkey=Gene;gene=truA2;gene_biotype=protein_coding;locus_tag=CD630_17840
gene13963	AM180355.1	2831612	2832349	-	gene	ID=gene-CD630_24550	ID=gene-CD630_24550;Name=CD630_24550;gbkey=Gene;gene_biotype=protein_coding;locus_tag=CD630_24550
gene13964	AM180355.1	2980933	2981670	-	gene	ID=gene-CD630_25770	ID=gene-CD630_25770;Name=fabG;gbkey=Gene;gene=fabG;gene_biotype=protein_coding;locus_tag=CD630_25770
gene1399	AM180355.1	4229263	4231425	-	gene	ID=gene-CD630_36240	ID=gene-CD630_36240;Name=CD630_36240;gbkey=Gene;gene_biotype=protein_coding;locus_tag=CD630_36240
gene14011	AM180355.1	2386592	2387314	-	gene	ID=gene-CD630_20710	ID=gene-CD630_20710;Name=CD630_20710;gbkey=Gene;gene_biotype=protein_coding;locus_tag=CD630_20710
gene14022	AM180355.1	3591394	3592116	+	gene	ID=gene-CD630_30900	ID=gene-CD630_30900;Name=treR;gbkey=Gene;gene=treR;gene_biotype=protein_coding;locus_tag=CD630_30900
gene14033	AM180355.1	780838	781572	+	gene	ID=gene-CD630_06550	ID=gene-CD630_06550;Name=CD630_06550;gbkey=Gene;gene_biotype=protein_coding;locus_tag=CD630_06550
gene14034	AM180355.1	928164	928898	-	gene	ID=gene-CD630_07580	ID=gene-CD630_07580;Name=pflA;gbkey=Gene;gene=pflA;gene_biotype=protein_coding;locus_tag=CD630_07580
gene14035	AM180355.1	1272629	1273363	+	gene	ID=gene-CD630_10800	ID=gene-CD630_10800;Name=CD630_10800;gbkey=Gene;gene_biotype=protein_coding;locus_tag=CD630_10800
gene14037	AM180355.1	2472789	2473523	-	gene	ID=gene-CD630_21360	ID=gene-CD630_21360;Name=uppS;gbkey=Gene;gene=uppS;gene_biotype=protein_coding;locus_tag=CD630_21360
gene14038	AM180355.1	4209384	4210118	+	gene	ID=gene-CD630_36020	ID=gene-CD630_36020;Name=CD630_36020;gbkey=Gene;gene_biotype=protein_coding;locus_tag=CD630_36020
gene14051	AM180355.1	1197700	1198428	+	gene	ID=gene-CD630_10260	ID=gene-CD630_10260;Name=potC;gbkey=Gene;gene=potC;gene_biotype=protein_coding;locus_tag=CD630_10260
gene14101	AM180355.1	1729787	1730395	+	gene	ID=gene-CD630_14930	ID=gene-CD630_14930;Name=CD630_14930;gbkey=Gene;gene_biotype=protein_coding;locus_tag=CD630_14930
gene14102	AM180355.1	419403	420134	+	gene	ID=gene-CD630_03430	ID=gene-CD630_03430;Name=CD630_03430;gbkey=Gene;gene_biotype=protein_coding;locus_tag=CD630_03430
gene14104	AM180355.1	1621709	1622440	-	gene	ID=gene-CD630_14020	ID=gene-CD630_14020;Name=glpQ;gbkey=Gene;gene=glpQ;gene_biotype=protein_coding;locus_tag=CD630_14020
gene14105	AM180355.1	1718894	1719625	+	gene	ID=gene-CD630_14830	ID=gene-CD630_14830;Name=ssuB;gbkey=Gene;gene=ssuB;gene_biotype=protein_coding;locus_tag=CD630_14830
gene14106	AM180355.1	2238709	2239455	-	gene	ID=gene-CD630_19410	ID=gene-CD630_19410;Name=CD630_19410;gbkey=Gene;gene_biotype=protein_coding;locus_tag=CD630_19410
gene14107	AM180355.1	2675484	2676215	+	gene	ID=gene-CD630_23140	ID=gene-CD630_23140;Name=CD630_23140;gbkey=Gene;gene_biotype=protein_coding;locus_tag=CD630_23140
gene14108	AM180355.1	3369220	3369951	-	gene	ID=gene-CD630_28810	ID=gene-CD630_28810;Name=celG;gbkey=Gene;gene=celG;gene_biotype=protein_coding;locus_tag=CD630_28810
gene14156	AM180355.1	3617496	3618212	-	gene	ID=gene-CD630_31090	ID=gene-CD630_31090;Name=CD630_31090;gbkey=Gene;gene_biotype=protein_coding;locus_tag=CD630_31090
gene14177	AM180355.1	370555	371283	-	gene	ID=gene-CD630_03090	ID=gene-CD630_03090;Name=CD630_03090;gbkey=Gene;gene_biotype=protein_coding;locus_tag=CD630_03090
gene14178	AM180355.1	1958913	1959641	+	gene	ID=gene-CD630_16850	ID=gene-CD630_16850;Name=CD630_16850;gbkey=Gene;gene_biotype=protein_coding;locus_tag=CD630_16850
gene14179	AM180355.1	4215680	4216408	-	gene	ID=gene-CD630_36080	ID=gene-CD630_36080;Name=CD630_36080;gbkey=Gene;gene_biotype=protein_coding;locus_tag=CD630_36080
gene14203	AM180355.1	1502404	1503123	+	gene	ID=gene-CD630_12950	ID=gene-CD630_12950;Name=scpA;gbkey=Gene;gene=scpA;gene_biotype=protein_coding;locus_tag=CD630_12950
gene14221	AM180355.1	2326042	2326722	+	gene	ID=gene-CD630_20150	ID=gene-CD630_20150;Name=CD630_20150;gbkey=Gene;gene_biotype=protein_coding;locus_tag=CD630_20150
gene14227	AM180355.1	1389188	1389913	+	gene	ID=gene-CD630_11880	ID=gene-CD630_11880;Name=CD630_11880;gbkey=Gene;gene_biotype=protein_coding;locus_tag=CD630_11880
gene14228	AM180355.1	1873825	1874550	+	gene	ID=gene-CD630_16180	ID=gene-CD630_16180;Name=CD630_16180;gbkey=Gene;gene_biotype=protein_coding;locus_tag=CD630_16180
gene14230	AM180355.1	2509503	2510228	-	gene	ID=gene-CD630_21690	ID=gene-CD630_21690;Name=CD630_21690;gbkey=Gene;gene_biotype=protein_coding;locus_tag=CD630_21690
gene14231	AM180355.1	3480424	3481149	+	gene	ID=gene-CD630_29960	ID=gene-CD630_29960;Name=CD630_29960;gbkey=Gene;gene_biotype=protein_coding;locus_tag=CD630_29960
gene14232	AM180355.1	4015772	4016497	-	gene	ID=gene-CD630_34240	ID=gene-CD630_34240;Name=cbiH;gbkey=Gene;gene=cbiH;gene_biotype=protein_coding;locus_tag=CD630_34240
gene14233	AM180355.1	4044971	4045696	+	gene	ID=gene-CD630_34520	ID=gene-CD630_34520;Name=CD630_34520;gbkey=Gene;gene_biotype=protein_coding;locus_tag=CD630_34520
gene1425	AM180355.1	1714822	1716978	+	gene	ID=gene-CD630_14790	ID=gene-CD630_14790;Name=feoB1;gbkey=Gene;gene=feoB1;gene_biotype=protein_coding;locus_tag=CD630_14790
gene14282	AM180355.1	2642988	2643674	-	gene	ID=gene-CD630_22780	ID=gene-CD630_22780;Name=araD;gbkey=Gene;gene=araD;gene_biotype=protein_coding;locus_tag=CD630_22780
gene14306	AM180355.1	478328	479050	+	gene	ID=gene-CD630_04050	ID=gene-CD630_04050;Name=rluA;gbkey=Gene;gene=rluA;gene_biotype=protein_coding;locus_tag=CD630_04050
gene14307	AM180355.1	919374	920096	+	gene	ID=gene-CD630_07520	ID=gene-CD630_07520;Name=CD630_07520;gbkey=Gene;gene_biotype=protein_coding;locus_tag=CD630_07520
gene14308	AM180355.1	1799659	1800381	+	gene	ID=gene-CD630_15520	ID=gene-CD630_15520;Name=hisA;gbkey=Gene;gene=hisA;gene_biotype=protein_coding;locus_tag=CD630_15520
gene14368	AM180355.1	1151277	1151996	+	gene	ID=gene-CD630_09870	ID=gene-CD630_09870;Name=CD630_09870;gbkey=Gene;gene_biotype=protein_coding;locus_tag=CD630_09870
gene14369	AM180355.1	1675403	1676122	+	gene	ID=gene-CD630_14440	ID=gene-CD630_14440;Name=CD630_14440;gbkey=Gene;gene_biotype=protein_coding;locus_tag=CD630_14440
gene14370	AM180355.1	2803111	2803830	-	gene	ID=gene-CD630_24280	ID=gene-CD630_24280;Name=CD630_24280;gbkey=Gene;gene_biotype=protein_coding;locus_tag=CD630_24280
gene14371	AM180355.1	2815709	2816428	-	gene	ID=gene-CD630_24390	ID=gene-CD630_24390;Name=CD630_24390;gbkey=Gene;gene_biotype=protein_coding;locus_tag=CD630_24390
gene14372	AM180355.1	2895036	2895755	-	gene	ID=gene-CD630_25070	ID=gene-CD630_25070;Name=CD630_25070;gbkey=Gene;gene_biotype=protein_coding;locus_tag=CD630_25070
gene14374	AM180355.1	4283223	4283950	-	pseudogene	ID=gene-CD630_36740	ID=gene-CD630_36740;Name=rsmG;gbkey=Gene;gene=rsmG;gene_biotype=pseudogene;locus_tag=CD630_36740;pseudo=true;pseudogene=unknown
gene14411	AM180355.1	2761487	2762191	-	gene	ID=gene-CD630_23920	ID=gene-CD630_23920;Name=CD630_23920;gbkey=Gene;gene_biotype=protein_coding;locus_tag=CD630_23920
gene14444	AM180355.1	199539	200255	+	gene	ID=gene-CD630_01500	ID=gene-CD630_01500;Name=CD630_01500;gbkey=Gene;gene_biotype=protein_coding;locus_tag=CD630_01500
gene14446	AM180355.1	658485	659201	+	gene	ID=gene-CD630_05520	ID=gene-CD630_05520;Name=sleB;gbkey=Gene;gene=sleB;gene_biotype=protein_coding;gene_synonym=prsW
gene14447	AM180355.1	1860495	1861211	+	gene	ID=gene-CD630_16070	ID=gene-CD630_16070;Name=CD630_16070;gbkey=Gene;gene_biotype=protein_coding;locus_tag=CD630_16070
gene14448	AM180355.1	2033527	2034243	+	gene	ID=gene-CD630_17550	ID=gene-CD630_17550;Name=CD630_17550;gbkey=Gene;gene_biotype=protein_coding;locus_tag=CD630_17550
gene14449	AM180355.1	2363367	2364083	-	gene	ID=gene-CD630_20500	ID=gene-CD630_20500;Name=rluB;gbkey=Gene;gene=rluB;gene_biotype=protein_coding;locus_tag=CD630_20500
gene14450	AM180355.1	3776445	3777161	+	gene	ID=gene-CD630_32270	ID=gene-CD630_32270;Name=dapH;gbkey=Gene;gene=dapH;gene_biotype=protein_coding;locus_tag=CD630_32270
gene14451	AM180355.1	4198042	4198758	-	gene	ID=gene-CD630_35920	ID=gene-CD630_35920;Name=pyrF;gbkey=Gene;gene=pyrF;gene_biotype=protein_coding;locus_tag=CD630_35920
gene14452	AM180355.1	4208543	4209259	-	gene	ID=gene-CD630_36010	ID=gene-CD630_36010;Name=CD630_36010;gbkey=Gene;gene_biotype=protein_coding;locus_tag=CD630_36010
gene1449	AM180355.1	2696513	2698642	-	gene	ID=gene-CD630_23330	ID=gene-CD630_23330;Name=mtlR;gbkey=Gene;gene=mtlR;gene_biotype=protein_coding;locus_tag=CD630_23330
gene14513	AM180355.1	1282293	1283006	+	gene	ID=gene-CD630_10890	ID=gene-CD630_10890;Name=rgbR;gbkey=Gene;gene=rgbR;gene_biotype=protein_coding;locus_tag=CD630_10890
gene14514	AM180355.1	1367910	1368623	+	gene	ID=gene-CD630_11690	ID=gene-CD630_11690;Name=CD630_11690;gbkey=Gene;gene_biotype=protein_coding;locus_tag=CD630_11690
gene14515	AM180355.1	2372860	2373573	-	gene	ID=gene-CD630_20580	ID=gene-CD630_20580;Name=CD630_20580;gbkey=Gene;gene_biotype=protein_coding;locus_tag=CD630_20580
gene14516	AM180355.1	2476120	2476833	-	gene	ID=gene-CD630_21400	ID=gene-CD630_21400;Name=rpsB;gbkey=Gene;gene=rpsB;gene_biotype=protein_coding;locus_tag=CD630_21400
gene14517	AM180355.1	3979196	3979909	-	gene	ID=gene-CD630_34010	ID=gene-CD630_34010;Name=CD630_34010;gbkey=Gene;gene_biotype=protein_coding;locus_tag=CD630_34010
gene1457	AM180355.1	193217	195358	+	gene	ID=gene-CD630_01450	ID=gene-CD630_01450;Name=CD630_01450;gbkey=Gene;gene_biotype=protein_coding;locus_tag=CD630_01450
gene14599	AM180355.1	1448918	1449628	+	gene	ID=gene-CD630_12480	ID=gene-CD630_12480;Name=rnc;gbkey=Gene;gene=rnc;gene_biotype=protein_coding;locus_tag=CD630_12480
gene14600	AM180355.1	1717336	1718046	+	gene	ID=gene-CD630_14810	ID=gene-CD630_14810;Name=CD630_14810;gbkey=Gene;gene_biotype=protein_coding;locus_tag=CD630_14810
gene14601	AM180355.1	3810124	3810834	-	gene	ID=gene-CD630_32550	ID=gene-CD630_32550;Name=rgaR;gbkey=Gene;gene=rgaR;gene_biotype=protein_coding;locus_tag=CD630_32550
gene14602	AM180355.1	4172615	4173325	-	gene	ID=gene-CD630_35720	ID=gene-CD630_35720;Name=CD630_35720;gbkey=Gene;gene_biotype=protein_coding;locus_tag=CD630_35720
gene1462	AM180355.1	4238657	4240744	-	gene	ID=gene-CD630_36310	ID=gene-CD630_36310;Name=CD630_36310;gbkey=Gene;gene_biotype=protein_coding;locus_tag=CD630_36310
gene14632	AM180355.1	2674802	2675497	+	gene	ID=gene-CD630_23130	ID=gene-CD630_23130;Name=CD630_23130;gbkey=Gene;gene_biotype=protein_coding;locus_tag=CD630_23130
gene14639	AM180355.1	2059089	2059790	+	gene	ID=gene-CD630_17780	ID=gene-CD630_17780;Name=CD630_17780;gbkey=Gene;gene_biotype=protein_coding;locus_tag=CD630_17780
gene1464	AM180355.1	3696068	3698203	-	gene	ID=gene-CD630_31640	ID=gene-CD630_31640;Name=rnr;gbkey=Gene;gene=rnr;gene_biotype=protein_coding;locus_tag=CD630_31640
gene14645	AM180355.1	2743699	2744403	-	gene	ID=gene-CD630_23780	ID=gene-CD630_23780;Name=CD630_23780;gbkey=Gene;gene_biotype=protein_coding;locus_tag=CD630_23780
gene14651	AM180355.1	809633	810346	+	gene	ID=gene-CD630_06680	ID=gene-CD630_06680;Name=CD630_06680;gbkey=Gene;gene_biotype=protein_coding;locus_tag=CD630_06680
gene14653	AM180355.1	1342346	1343053	+	gene	ID=gene-CD630_11440	ID=gene-CD630_11440;Name=radC;gbkey=Gene;gene=radC;gene_biotype=protein_coding;locus_tag=CD630_11440
gene14655	AM180355.1	2432420	2433127	-	gene	ID=gene-CD630_21050	ID=gene-CD630_21050;Name=CD630_21050;gbkey=Gene;gene_biotype=protein_coding;locus_tag=CD630_21050
gene14656	AM180355.1	2860706	2861413	-	gene	ID=gene-CD630_24790	ID=gene-CD630_24790;Name=CD630_24790;gbkey=Gene;gene_biotype=protein_coding;locus_tag=CD630_24790
gene14657	AM180355.1	2930330	2931037	-	gene	ID=gene-CD630_25360	ID=gene-CD630_25360;Name=CD630_25360;gbkey=Gene;gene_biotype=protein_coding;locus_tag=CD630_25360
gene14682	AM180355.1	3055922	3056596	-	gene	ID=gene-CD630_26480	ID=gene-CD630_26480;Name=CD630_26480;gbkey=Gene;gene_biotype=protein_coding;locus_tag=CD630_26480
gene14735	AM180355.1	622259	622963	+	gene	ID=gene-CD630_05210	ID=gene-CD630_05210;Name=CD630_05210;gbkey=Gene;gene_biotype=protein_coding;locus_tag=CD630_05210
gene14736	AM180355.1	1180992	1181696	+	gene	ID=gene-CD630_10130	ID=gene-CD630_10130;Name=CD630_10130;gbkey=Gene;gene_biotype=protein_coding;locus_tag=CD630_10130
gene14737	AM180355.1	1692377	1693081	+	gene	ID=gene-CD630_14640	ID=gene-CD630_14640;Name=CD630_14640;gbkey=Gene;gene_biotype=protein_coding;locus_tag=CD630_14640
gene14738	AM180355.1	1889811	1890515	-	gene	ID=gene-CD630_16310	ID=gene-CD630_16310;Name=sodA;gbkey=Gene;gene=sodA;gene_biotype=protein_coding;locus_tag=CD630_16310
gene14739	AM180355.1	2474341	2475045	-	gene	ID=gene-CD630_21380	ID=gene-CD630_21380;Name=pyrH;gbkey=Gene;gene=pyrH;gene_biotype=protein_coding;locus_tag=CD630_21380
gene14741	AM180355.1	3030271	3030984	-	gene	ID=gene-CD630_26230	ID=gene-CD630_26230;Name=CD630_26230;gbkey=Gene;gene_biotype=protein_coding;locus_tag=CD630_26230
gene14742	AM180355.1	3217971	3218678	-	gene	ID=gene-CD630_27680	ID=gene-CD630_27680;Name=CD630_27680;gbkey=Gene;gene_biotype=protein_coding;locus_tag=CD630_27680
gene14743	AM180355.1	3373210	3373914	-	gene	ID=gene-CD630_28850	ID=gene-CD630_28850;Name=CD630_28850;gbkey=Gene;gene_biotype=protein_coding;locus_tag=CD630_28850
gene14744	AM180355.1	4064230	4064934	-	gene	ID=gene-CD630_34740	ID=gene-CD630_34740;Name=atpA2;gbkey=Gene;gene=atpA2;gene_biotype=protein_coding;locus_tag=CD630_34740
gene14782	AM180355.1	3317366	3318064	-	gene	ID=gene-CD630_28380	ID=gene-CD630_28380;Name=CD630_28380;gbkey=Gene;gene_biotype=protein_coding;locus_tag=CD630_28380
gene14828	AM180355.1	1358977	1359678	+	gene	ID=gene-CD630_11590	ID=gene-CD630_11590;Name=CD630_11590;gbkey=Gene;gene_biotype=protein_coding;locus_tag=CD630_11590
gene14829	AM180355.1	1678848	1679549	+	gene	ID=gene-CD630_14480	ID=gene-CD630_14480;Name=CD630_14480;gbkey=Gene;gene_biotype=protein_coding;locus_tag=CD630_14480
gene14831	AM180355.1	2041602	2042303	+	gene	ID=gene-CD630_17640	ID=gene-CD630_17640;Name=CD630_17640;gbkey=Gene;gene_biotype=protein_coding;locus_tag=CD630_17640
gene14832	AM180355.1	2653578	2654279	+	gene	ID=gene-CD630_22860	ID=gene-CD630_22860;Name=CD630_22860;gbkey=Gene;gene_biotype=protein_coding;locus_tag=CD630_22860
gene14833	AM180355.1	2987002	2987703	-	gene	ID=gene-CD630_25820	ID=gene-CD630_25820;Name=CD630_25820;gbkey=Gene;gene_biotype=protein_coding;locus_tag=CD630_25820
gene14835	AM180355.1	4256186	4256887	-	gene	ID=gene-CD630_36460	ID=gene-CD630_36460;Name=CD630_36460;gbkey=Gene;gene_biotype=protein_coding;locus_tag=CD630_36460
gene1484	AM180355.1	2543119	2545218	-	gene	ID=gene-CD630_21960	ID=gene-CD630_21960;Name=CD630_21960;gbkey=Gene;gene_biotype=protein_coding;locus_tag=CD630_21960
gene1486	AM180355.1	643952	646054	+	gene	ID=gene-CD630_05390	ID=gene-CD630_05390;Name=cheA;gbkey=Gene;gene=cheA;gene_biotype=protein_coding;locus_tag=CD630_05390
gene14912	AM180355.1	3822535	3823215	-	gene	ID=gene-CD630_32650	ID=gene-CD630_32650;Name=CD630_32650;gbkey=Gene;gene_biotype=protein_coding;locus_tag=CD630_32650
gene14922	AM180355.1	243515	244207	+	gene	ID=gene-CD630_01850	ID=gene-CD630_01850;Name=pyrK;gbkey=Gene;gene=pyrK;gene_biotype=protein_coding;locus_tag=CD630_01850
gene14923	AM180355.1	2657057	2657749	-	gene	ID=gene-CD630_22890	ID=gene-CD630_22890;Name=CD630_22890;gbkey=Gene;gene_biotype=protein_coding;locus_tag=CD630_22890
gene14947	AM180355.1	282205	282903	+	gene	ID=gene-CD630_02190	ID=gene-CD630_02190;Name=purC;gbkey=Gene;gene=purC;gene_biotype=protein_coding;locus_tag=CD630_02190
gene14950	AM180355.1	954571	955269	+	gene	ID=gene-CD630_07820	ID=gene-CD630_07820;Name=yunB;gbkey=Gene;gene=yunB;gene_biotype=protein_coding;locus_tag=CD630_07820
gene14951	AM180355.1	1170662	1171360	+	gene	ID=gene-CD630_10010	ID=gene-CD630_10010;Name=CD630_10010;gbkey=Gene;gene_biotype=protein_coding;locus_tag=CD630_10010
gene14953	AM180355.1	2063607	2064341	+	gene	ID=gene-CD630_17820	ID=gene-CD630_17820;Name=CD630_17820;gbkey=Gene;gene_biotype=protein_coding;locus_tag=CD630_17820
gene14954	AM180355.1	2118785	2119483	+	gene	ID=gene-CD630_18300	ID=gene-CD630_18300;Name=kdpE;gbkey=Gene;gene=kdpE;gene_biotype=protein_coding;locus_tag=CD630_18300
gene14955	AM180355.1	2339768	2340466	+	gene	ID=gene-CD630_20280	ID=gene-CD630_20280;Name=racX;gbkey=Gene;gene=racX;gene_biotype=protein_coding;locus_tag=CD630_20280
gene14957	AM180355.1	3017040	3017738	-	gene	ID=gene-CD630_26110	ID=gene-CD630_26110;Name=mtnN;gbkey=Gene;gene=mtnN;gene_biotype=protein_coding;locus_tag=CD630_26110
gene14958	AM180355.1	3056601	3057299	-	gene	ID=gene-CD630_26490	ID=gene-CD630_26490;Name=CD630_26490;gbkey=Gene;gene_biotype=protein_coding;locus_tag=CD630_26490
gene14959	AM180355.1	3160628	3161326	-	gene	ID=gene-CD630_27240	ID=gene-CD630_27240;Name=CD630_27240;gbkey=Gene;gene_biotype=protein_coding;locus_tag=CD630_27240
gene14960	AM180355.1	3932743	3933441	-	gene	ID=gene-CD630_33670	ID=gene-CD630_33670;Name=CD630_33670;gbkey=Gene;gene_biotype=protein_coding;locus_tag=CD630_33670
gene14991	AM180355.1	3344830	3345525	-	gene	ID=gene-CD630_28610	ID=gene-CD630_28610;Name=CD630_28610;gbkey=Gene;gene_biotype=protein_coding;locus_tag=CD630_28610
gene1500	AM180355.1	1662517	1664655	-	gene	ID=gene-CD630_14330	ID=gene-CD630_14330;Name=cotE;gbkey=Gene;gene=cotE;gene_biotype=protein_coding;locus_tag=CD630_14330
gene15021	AM180355.1	1458695	1459390	+	gene	ID=gene-CD630_12560	ID=gene-CD630_12560;Name=trmD;gbkey=Gene;gene=trmD;gene_biotype=protein_coding;locus_tag=CD630_12560
gene15022	AM180355.1	1605002	1605697	+	gene	ID=gene-CD630_13860	ID=gene-CD630_13860;Name=CD630_13860;gbkey=Gene;gene_biotype=protein_coding;locus_tag=CD630_13860
gene15040	AM180355.1	854087	854770	+	gene	ID=gene-CD630_07020	ID=gene-CD630_07020;Name=CD630_07020;gbkey=Gene;gene_biotype=protein_coding;locus_tag=CD630_07020
gene1507	AM180355.1	890080	892206	+	gene	ID=gene-CD630_07280	ID=gene-CD630_07280;Name=CD630_07280;gbkey=Gene;gene_biotype=protein_coding;locus_tag=CD630_07280
gene15103	AM180355.1	422075	422767	+	gene	ID=gene-CD630_03460	ID=gene-CD630_03460;Name=CD630_03460;gbkey=Gene;gene_biotype=protein_coding;locus_tag=CD630_03460
gene15105	AM180355.1	569476	570168	+	gene	ID=gene-CD630_04810	ID=gene-CD630_04810;Name=spaR;gbkey=Gene;gene=spaR;gene_biotype=protein_coding;locus_tag=CD630_04810
gene15107	AM180355.1	1415872	1416564	+	gene	ID=gene-CD630_12170	ID=gene-CD630_12170;Name=CD630_12170;gbkey=Gene;gene_biotype=protein_coding;locus_tag=CD630_12170
gene15108	AM180355.1	3047477	3048169	-	gene	ID=gene-CD630_26380	ID=gene-CD630_26380;Name=CD630_26380;gbkey=Gene;gene_biotype=protein_coding;locus_tag=CD630_26380
gene15109	AM180355.1	3471485	3472177	-	gene	ID=gene-CD630_29880	ID=gene-CD630_29880;Name=CD630_29880;gbkey=Gene;gene_biotype=protein_coding;locus_tag=CD630_29880
gene15110	AM180355.1	4207717	4208409	-	gene	ID=gene-CD630_36000	ID=gene-CD630_36000;Name=CD630_36000;gbkey=Gene;gene_biotype=protein_coding;locus_tag=CD630_36000
gene15172	AM180355.1	1194085	1194774	+	gene	ID=gene-CD630_10220	ID=gene-CD630_10220;Name=CD630_10220;gbkey=Gene;gene_biotype=protein_coding;locus_tag=CD630_10220
gene15174	AM180355.1	1398946	1399635	+	gene	ID=gene-CD630_11990	ID=gene-CD630_11990;Name=spoIIIAH;gbkey=Gene;gene=spoIIIAH;gene_biotype=protein_coding;locus_tag=CD630_11990
gene15175	AM180355.1	1671041	1671730	+	gene	ID=gene-CD630_14400	ID=gene-CD630_14400;Name=CD630_14400;gbkey=Gene;gene_biotype=protein_coding;locus_tag=CD630_14400
gene15176	AM180355.1	1686037	1686726	+	gene	ID=gene-CD630_14560	ID=gene-CD630_14560;Name=CD630_14560;gbkey=Gene;gene_biotype=protein_coding;locus_tag=CD630_14560
gene15177	AM180355.1	1958097	1958786	+	gene	ID=gene-CD630_16840	ID=gene-CD630_16840;Name=CD630_16840;gbkey=Gene;gene_biotype=protein_coding;locus_tag=CD630_16840
gene15178	AM180355.1	1980665	1981354	+	gene	ID=gene-CD630_17060	ID=gene-CD630_17060;Name=thiE2;gbkey=Gene;gene=thiE2;gene_biotype=protein_coding;locus_tag=CD630_17060
gene15179	AM180355.1	2585790	2586479	-	gene	ID=gene-CD630_22340	ID=gene-CD630_22340;Name=CD630_22340;gbkey=Gene;gene_biotype=protein_coding;locus_tag=CD630_22340
gene15180	AM180355.1	2917047	2917736	-	gene	ID=gene-CD630_25240	ID=gene-CD630_25240;Name=nadD;gbkey=Gene;gene=nadD;gene_biotype=protein_coding;locus_tag=CD630_25240
gene15181	AM180355.1	4144250	4144939	-	gene	ID=gene-CD630_35500	ID=gene-CD630_35500;Name=tmk;gbkey=Gene;gene=tmk;gene_biotype=protein_coding;locus_tag=CD630_35500
gene15242	AM180355.1	2269902	2270588	-	gene	ID=gene-CD630_19680	ID=gene-CD630_19680;Name=CD630_19680;gbkey=Gene;gene_biotype=protein_coding;locus_tag=CD630_19680
gene15275	AM180355.1	1244385	1245071	+	gene	ID=gene-CD630_10510	ID=gene-CD630_10510;Name=CD630_10510;gbkey=Gene;gene_biotype=protein_coding;locus_tag=CD630_10510
gene15276	AM180355.1	2009558	2010244	-	gene	ID=gene-CD630_17350	ID=gene-CD630_17350;Name=CD630_17350;gbkey=Gene;gene_biotype=protein_coding;locus_tag=CD630_17350
gene15277	AM180355.1	2243024	2243710	-	gene	ID=gene-CD630_19470	ID=gene-CD630_19470;Name=CD630_19470;gbkey=Gene;gene_biotype=protein_coding;locus_tag=CD630_19470
gene15278	AM180355.1	2255115	2255801	-	gene	ID=gene-CD630_19550	ID=gene-CD630_19550;Name=CD630_19550;gbkey=Gene;gene_biotype=protein_coding;locus_tag=CD630_19550
gene15279	AM180355.1	2258943	2259629	+	gene	ID=gene-CD630_19590	ID=gene-CD630_19590;Name=CD630_19590;gbkey=Gene;gene_biotype=protein_coding;locus_tag=CD630_19590
gene15281	AM180355.1	3235407	3236093	-	gene	ID=gene-CD630_27830	ID=gene-CD630_27830;Name=CD630_27830;gbkey=Gene;gene_biotype=protein_coding;locus_tag=CD630_27830
gene15283	AM180355.1	4187822	4188508	-	gene	ID=gene-CD630_35870	ID=gene-CD630_35870;Name=CD630_35870;gbkey=Gene;gene_biotype=protein_coding;locus_tag=CD630_35870
gene1529	AM180355.1	1758443	1760563	-	gene	ID=gene-CD630_15170	ID=gene-CD630_15170;Name=feoB;gbkey=Gene;gene=feoB;gene_biotype=protein_coding;locus_tag=CD630_15170
gene15321	AM180355.1	655805	656461	+	gene	ID=gene-CD630_05500	ID=gene-CD630_05500;Name=CD630_05500;gbkey=Gene;gene_biotype=protein_coding;locus_tag=CD630_05500
gene15346	AM180355.1	546662	547345	+	gene	ID=gene-CD630_04590	ID=gene-CD630_04590;Name=CD630_04590;gbkey=Gene;gene_biotype=protein_coding;locus_tag=CD630_04590
gene15347	AM180355.1	1348678	1349361	+	gene	ID=gene-CD630_11490	ID=gene-CD630_11490;Name=minC;gbkey=Gene;gene=minC;gene_biotype=protein_coding;locus_tag=CD630_11490
gene15348	AM180355.1	2032847	2033530	+	gene	ID=gene-CD630_17540	ID=gene-CD630_17540;Name=CD630_17540;gbkey=Gene;gene_biotype=protein_coding;locus_tag=CD630_17540
gene15349	AM180355.1	2928226	2928909	-	gene	ID=gene-CD630_25340	ID=gene-CD630_25340;Name=CD630_25340;gbkey=Gene;gene_biotype=protein_coding;locus_tag=CD630_25340
gene15355	AM180355.1	2862992	2863666	-	gene	ID=gene-CD630_24810	ID=gene-CD630_24810;Name=ung;gbkey=Gene;gene=ung;gene_biotype=protein_coding;locus_tag=CD630_24810
gene15376	AM180355.1	3514169	3514843	-	gene	ID=gene-CD630_30250	ID=gene-CD630_30250;Name=CD630_30250;gbkey=Gene;gene_biotype=protein_coding;locus_tag=CD630_30250
gene15400	AM180355.1	1794284	1794937	+	gene	ID=gene-CD630_15460	ID=gene-CD630_15460;Name=CD630_15460;gbkey=Gene;gene_biotype=protein_coding;locus_tag=CD630_15460
gene15423	AM180355.1	579471	580151	-	gene	ID=gene-CD630_04890	ID=gene-CD630_04890;Name=CD630_04890;gbkey=Gene;gene_biotype=protein_coding;locus_tag=CD630_04890
gene15426	AM180355.1	2552625	2553278	+	gene	ID=gene-CD630_22030	ID=gene-CD630_22030;Name=CD630_22030;gbkey=Gene;gene_biotype=protein_coding;locus_tag=CD630_22030
gene15427	AM180355.1	3339977	3340657	-	gene	ID=gene-CD630_28570	ID=gene-CD630_28570;Name=CD630_28570;gbkey=Gene;gene_biotype=protein_coding;locus_tag=CD630_28570
gene15428	AM180355.1	3546910	3547590	-	gene	ID=gene-CD630_30540	ID=gene-CD630_30540;Name=CD630_30540;gbkey=Gene;gene_biotype=protein_coding;locus_tag=CD630_30540
gene15429	AM180355.1	3859206	3859886	-	gene	ID=gene-CD630_32970	ID=gene-CD630_32970;Name=CD630_32970;gbkey=Gene;gene_biotype=protein_coding;locus_tag=CD630_32970
gene15430	AM180355.1	4070188	4070868	-	gene	ID=gene-CD630_34830	ID=gene-CD630_34830;Name=CD630_34830;gbkey=Gene;gene_biotype=protein_coding;locus_tag=CD630_34830
gene15446	AM180355.1	4181832	4182497	+	gene	ID=gene-CD630_35820	ID=gene-CD630_35820;Name=CD630_35820;gbkey=Gene;gene_biotype=protein_coding;locus_tag=CD630_35820
gene15468	AM180355.1	2229612	2230247	-	gene	ID=gene-CD630_19310	ID=gene-CD630_19310;Name=lexA;gbkey=Gene;gene=lexA;gene_biotype=protein_coding;locus_tag=CD630_19310
gene15495	AM180355.1	158247	158924	+	gene	ID=gene-CD630_01140	ID=gene-CD630_01140;Name=CD630_01140;gbkey=Gene;gene_biotype=protein_coding;locus_tag=CD630_01140
gene15496	AM180355.1	752696	753373	-	gene	ID=gene-CD630_06290	ID=gene-CD630_06290;Name=CD630_06290;gbkey=Gene;gene_biotype=protein_coding;locus_tag=CD630_06290
gene15497	AM180355.1	918638	919315	+	gene	ID=gene-CD630_07510	ID=gene-CD630_07510;Name=CD630_07510;gbkey=Gene;gene_biotype=protein_coding;locus_tag=CD630_07510
gene15498	AM180355.1	961938	962615	+	gene	ID=gene-CD630_07890	ID=gene-CD630_07890;Name=CD630_07890;gbkey=Gene;gene_biotype=protein_coding;locus_tag=CD630_07890
gene15499	AM180355.1	1694392	1695069	+	gene	ID=gene-CD630_14660	ID=gene-CD630_14660;Name=CD630_14660;gbkey=Gene;gene_biotype=protein_coding;locus_tag=CD630_14660
gene15500	AM180355.1	3148377	3149054	+	gene	ID=gene-CD630_27180	ID=gene-CD630_27180;Name=CD630_27180;gbkey=Gene;gene_biotype=protein_coding;locus_tag=CD630_27180
gene15501	AM180355.1	3344136	3344813	-	gene	ID=gene-CD630_28600	ID=gene-CD630_28600;Name=CD630_28600;gbkey=Gene;gene_biotype=protein_coding;locus_tag=CD630_28600
gene15502	AM180355.1	3825352	3826029	-	gene	ID=gene-CD630_32670	ID=gene-CD630_32670;Name=CD630_32670;gbkey=Gene;gene_biotype=protein_coding;locus_tag=CD630_32670
gene15533	AM180355.1	1801149	1801817	+	gene	ID=gene-CD630_15540	ID=gene-CD630_15540;Name=hisI;gbkey=Gene;gene=hisI;gene_biotype=protein_coding;locus_tag=CD630_15540
gene15543	AM180355.1	2365514	2366173	-	gene	ID=gene-CD630_20520	ID=gene-CD630_20520;Name=CD630_20520;gbkey=Gene;gene_biotype=protein_coding;locus_tag=CD630_20520
gene15553	AM180355.1	2764354	2765022	-	gene	ID=gene-CD630_23950	ID=gene-CD630_23950;Name=CD630_23950;gbkey=Gene;gene_biotype=protein_coding;locus_tag=CD630_23950
gene15569	AM180355.1	187366	188040	+	gene	ID=gene-CD630_01410	ID=gene-CD630_01410;Name=cutC;gbkey=Gene;gene=cutC;gene_biotype=protein_coding;locus_tag=CD630_01410
gene15570	AM180355.1	576313	576987	-	gene	ID=gene-CD630_04860	ID=gene-CD630_04860;Name=CD630_04860;gbkey=Gene;gene_biotype=protein_coding;locus_tag=CD630_04860
gene15571	AM180355.1	882959	883633	+	gene	ID=gene-CD630_07210	ID=gene-CD630_07210;Name=CD630_07210;gbkey=Gene;gene_biotype=protein_coding;locus_tag=CD630_07210
gene15572	AM180355.1	1191022	1191708	+	gene	ID=gene-CD630_10200	ID=gene-CD630_10200;Name=CD630_10200;gbkey=Gene;gene_biotype=protein_coding;locus_tag=CD630_10200
gene15573	AM180355.1	1425671	1426345	+	gene	ID=gene-CD630_12270	ID=gene-CD630_12270;Name=CD630_12270;gbkey=Gene;gene_biotype=protein_coding;locus_tag=CD630_12270
gene15574	AM180355.1	1654272	1654946	-	gene	ID=gene-CD630_14250	ID=gene-CD630_14250;Name=CD630_14250;gbkey=Gene;gene_biotype=protein_coding;locus_tag=CD630_14250
gene15575	AM180355.1	1771536	1772210	-	gene	ID=gene-CD630_15280	ID=gene-CD630_15280;Name=CD630_15280;gbkey=Gene;gene_biotype=protein_coding;locus_tag=CD630_15280
gene15576	AM180355.1	1774587	1775261	-	gene	ID=gene-CD630_15310	ID=gene-CD630_15310;Name=CD630_15310;gbkey=Gene;gene_biotype=protein_coding;locus_tag=CD630_15310
gene15577	AM180355.1	1959655	1960329	+	gene	ID=gene-CD630_16860	ID=gene-CD630_16860;Name=CD630_16860;gbkey=Gene;gene_biotype=protein_coding;locus_tag=CD630_16860
gene15578	AM180355.1	2439401	2440075	-	gene	ID=gene-CD630_21100	ID=gene-CD630_21100;Name=CD630_21100;gbkey=Gene;gene_biotype=protein_coding;locus_tag=CD630_21100
gene15598	AM180355.1	2592385	2593056	-	gene	ID=gene-CD630_22410	ID=gene-CD630_22410;Name=nanE;gbkey=Gene;gene=nanE;gene_biotype=protein_coding;locus_tag=CD630_22410
gene15628	AM180355.1	1507083	1507751	-	gene	ID=gene-CD630_13010	ID=gene-CD630_13010;Name=CD630_13010;gbkey=Gene;gene_biotype=protein_coding;locus_tag=CD630_13010
gene15629	AM180355.1	924319	924960	+	gene	ID=gene-CD630_07560	ID=gene-CD630_07560;Name=CD630_07560;gbkey=Gene;gene_biotype=protein_coding;locus_tag=CD630_07560
gene1563	AM180355.1	1527283	1529394	+	gene	ID=gene-CD630_13180	ID=gene-CD630_13180;Name=pnp;gbkey=Gene;gene=pnp;gene_biotype=protein_coding;locus_tag=CD630_13180
gene15630	AM180355.1	1746886	1747533	-	gene	ID=gene-CD630_15100	ID=gene-CD630_15100;Name=CD630_15100;gbkey=Gene;gene_biotype=protein_coding;locus_tag=CD630_15100
gene1564	AM180355.1	3215558	3217669	-	gene	ID=gene-CD630_27670	ID=gene-CD630_27670;Name=cwp19;gbkey=Gene;gene=cwp19;gene_biotype=protein_coding;locus_tag=CD630_27670
gene15646	AM180355.1	847385	848056	+	gene	ID=gene-CD630_06970	ID=gene-CD630_06970;Name=CD630_06970;gbkey=Gene;gene_biotype=protein_coding;locus_tag=CD630_06970
gene15648	AM180355.1	1961207	1961878	+	gene	ID=gene-CD630_16880	ID=gene-CD630_16880;Name=CD630_16880;gbkey=Gene;gene_biotype=protein_coding;locus_tag=CD630_16880
gene15649	AM180355.1	2057321	2057992	+	gene	ID=gene-CD630_17760	ID=gene-CD630_17760;Name=CD630_17760;gbkey=Gene;gene_biotype=protein_coding;locus_tag=CD630_17760
gene15650	AM180355.1	2256788	2257459	-	gene	ID=gene-CD630_19570	ID=gene-CD630_19570;Name=CD630_19570;gbkey=Gene;gene_biotype=protein_coding;locus_tag=CD630_19570
gene15651	AM180355.1	2408023	2408694	-	gene	ID=gene-CD630_20860	ID=gene-CD630_20860;Name=CD630_20860;gbkey=Gene;gene_biotype=protein_coding;locus_tag=CD630_20860
gene15652	AM180355.1	2979275	2979946	-	gene	ID=gene-CD630_25750	ID=gene-CD630_25750;Name=rpe1;gbkey=Gene;gene=rpe1;gene_biotype=protein_coding;locus_tag=CD630_25750
gene15653	AM180355.1	3284947	3285618	+	gene	ID=gene-CD630_28140	ID=gene-CD630_28140;Name=CD630_28140;gbkey=Gene;gene_biotype=protein_coding;locus_tag=CD630_28140
gene15654	AM180355.1	3749682	3750353	-	gene	ID=gene-CD630_32030	ID=gene-CD630_32030;Name=CD630_32030;gbkey=Gene;gene_biotype=protein_coding;locus_tag=CD630_32030
gene15703	AM180355.1	3195904	3196569	+	gene	ID=gene-CD630_27520	ID=gene-CD630_27520;Name=CD630_27520;gbkey=Gene;gene_biotype=protein_coding;locus_tag=CD630_27520
gene15720	AM180355.1	3430420	3431088	-	gene	ID=gene-CD630_29540	ID=gene-CD630_29540;Name=atpD;gbkey=Gene;gene=atpD;gene_biotype=protein_coding;locus_tag=CD630_29540
gene15740	AM180355.1	170652	171320	+	gene	ID=gene-CD630_01250	ID=gene-CD630_01250;Name=CD630_01250;gbkey=Gene;gene_biotype=protein_coding;locus_tag=CD630_01250
gene15742	AM180355.1	574322	574990	-	gene	ID=gene-CD630_04840	ID=gene-CD630_04840;Name=CD630_04840;gbkey=Gene;gene_biotype=protein_coding;locus_tag=CD630_04840
gene15743	AM180355.1	2443285	2443953	-	gene	ID=gene-CD630_21140	ID=gene-CD630_21140;Name=CD630_21140;gbkey=Gene;gene_biotype=protein_coding;locus_tag=CD630_21140
gene15766	AM180355.1	1951706	1952347	-	gene	ID=gene-CD630_16760	ID=gene-CD630_16760;Name=pcp;gbkey=Gene;gene=pcp;gene_biotype=protein_coding;locus_tag=CD630_16760
gene1580	AM180355.1	4258472	4260574	-	gene	ID=gene-CD630_36500	ID=gene-CD630_36500;Name=CD630_36500;gbkey=Gene;gene_biotype=protein_coding;locus_tag=CD630_36500
gene15822	AM180355.1	1953322	1953987	-	gene	ID=gene-CD630_16780	ID=gene-CD630_16780;Name=CD630_16780;gbkey=Gene;gene_biotype=protein_coding;locus_tag=CD630_16780
gene15823	AM180355.1	1971288	1971953	-	gene	ID=gene-CD630_16990	ID=gene-CD630_16990;Name=ribE;gbkey=Gene;gene=ribE;gene_biotype=protein_coding;locus_tag=CD630_16990
gene15824	AM180355.1	2260732	2261397	+	gene	ID=gene-CD630_19610	ID=gene-CD630_19610;Name=CD630_19610;gbkey=Gene;gene_biotype=protein_coding;locus_tag=CD630_19610
gene15825	AM180355.1	2682067	2682732	-	gene	ID=gene-CD630_23190	ID=gene-CD630_23190;Name=rpe;gbkey=Gene;gene=rpe;gene_biotype=protein_coding;locus_tag=CD630_23190
gene15827	AM180355.1	3093907	3094572	+	gene	ID=gene-CD630_26780	ID=gene-CD630_26780;Name=scoB;gbkey=Gene;gene=scoB;gene_biotype=protein_coding;locus_tag=CD630_26780
gene15828	AM180355.1	3829870	3830535	-	gene	ID=gene-CD630_32700	ID=gene-CD630_32700;Name=CD630_32700;gbkey=Gene;gene_biotype=protein_coding;locus_tag=CD630_32700
gene15831	AM180355.1	2376562	2377200	-	gene	ID=gene-CD630_20610	ID=gene-CD630_20610;Name=CD630_20610;gbkey=Gene;gene_biotype=protein_coding;locus_tag=CD630_20610
gene1585	AM180355.1	1203540	1205621	+	gene	ID=gene-CD630_10310	ID=gene-CD630_10310;Name=CD630_10310;gbkey=Gene;gene_biotype=protein_coding;locus_tag=CD630_10310
gene15862	AM180355.1	3210622	3211266	-	gene	ID=gene-CD630_27620	ID=gene-CD630_27620;Name=uppS1;gbkey=Gene;gene=uppS1;gene_biotype=protein_coding;locus_tag=CD630_27620
gene15864	AM180355.1	551364	552026	-	gene	ID=gene-CD630_04620	ID=gene-CD630_04620;Name=CD630_04620;gbkey=Gene;gene_biotype=protein_coding;locus_tag=CD630_04620
gene1588	AM180355.1	3477847	3479946	-	gene	ID=gene-CD630_29950	ID=gene-CD630_29950;Name=nrdE;gbkey=Gene;gene=nrdE;gene_biotype=protein_coding;locus_tag=CD630_29950
gene15915	AM180355.1	3302613	3303275	-	gene	ID=gene-CD630_28300	ID=gene-CD630_28300;Name=CD630_28300;gbkey=Gene;gene_biotype=protein_coding;locus_tag=CD630_28300
gene15916	AM180355.1	3441808	3442470	-	gene	ID=gene-CD630_29640	ID=gene-CD630_29640;Name=CD630_29640;gbkey=Gene;gene_biotype=protein_coding;locus_tag=CD630_29640
gene15968	AM180355.1	4165307	4165966	-	gene	ID=gene-CD630_35640	ID=gene-CD630_35640;Name=spoIIR;gbkey=Gene;gene=spoIIR;gene_biotype=protein_coding;locus_tag=CD630_35640
gene16033	AM180355.1	1725309	1725965	+	gene	ID=gene-CD630_14900	ID=gene-CD630_14900;Name=metI;gbkey=Gene;gene=metI;gene_biotype=protein_coding;locus_tag=CD630_14900
gene16035	AM180355.1	2977154	2977810	-	gene	ID=gene-CD630_25720	ID=gene-CD630_25720;Name=CD630_25720;gbkey=Gene;gene_biotype=protein_coding;locus_tag=CD630_25720
gene16036	AM180355.1	3093251	3093907	+	gene	ID=gene-CD630_26770	ID=gene-CD630_26770;Name=scoA;gbkey=Gene;gene=scoA;gene_biotype=protein_coding;locus_tag=CD630_26770
gene16050	AM180355.1	4212321	4212971	-	gene	ID=gene-CD630_36050	ID=gene-CD630_36050;Name=CD630_36050;gbkey=Gene;gene_biotype=protein_coding;locus_tag=CD630_36050
gene1609	AM180355.1	1610489	1612204	+	gene	ID=gene-CD630_13910	ID=gene-CD630_13910;Name=CD630_13910;gbkey=Gene;gene_biotype=protein_coding;locus_tag=CD630_13910
gene16095	AM180355.1	1068780	1069433	+	gene	ID=gene-CD630_08870	ID=gene-CD630_08870;Name=CD630_08870;gbkey=Gene;gene_biotype=protein_coding;locus_tag=CD630_08870
gene16097	AM180355.1	1792479	1793132	+	gene	ID=gene-CD630_15430	ID=gene-CD630_15430;Name=CD630_15430;gbkey=Gene;gene_biotype=protein_coding;locus_tag=CD630_15430
gene16098	AM180355.1	2216644	2217297	+	gene	ID=gene-CD630_19150	ID=gene-CD630_19150;Name=eutL;gbkey=Gene;gene=eutL;gene_biotype=protein_coding;locus_tag=CD630_19150
gene16100	AM180355.1	3124464	3125117	-	gene	ID=gene-CD630_27030	ID=gene-CD630_27030;Name=CD630_27030;gbkey=Gene;gene_biotype=protein_coding;locus_tag=CD630_27030
gene16101	AM180355.1	3817984	3818637	-	gene	ID=gene-CD630_32600	ID=gene-CD630_32600;Name=phoU;gbkey=Gene;gene=phoU;gene_biotype=protein_coding;locus_tag=CD630_32600
gene16104	AM180355.1	223261	223914	+	gene	ID=gene-CD630_01680	ID=gene-CD630_01680;Name=CD630_01680;gbkey=Gene;gene_biotype=protein_coding;locus_tag=CD630_01680
gene16167	AM180355.1	770505	771164	+	gene	ID=gene-CD630_06480	ID=gene-CD630_06480;Name=CD630_06480;gbkey=Gene;gene_biotype=protein_coding;locus_tag=CD630_06480
gene16168	AM180355.1	2098849	2099499	+	gene	ID=gene-CD630_18160	ID=gene-CD630_18160;Name=cmk;gbkey=Gene;gene=cmk;gene_biotype=protein_coding;locus_tag=CD630_18160
gene16169	AM180355.1	2693215	2693865	-	gene	ID=gene-CD630_23290	ID=gene-CD630_23290;Name=tal;gbkey=Gene;gene=tal;gene_biotype=protein_coding;locus_tag=CD630_23290
gene1617	AM180355.1	1753526	1755619	+	gene	ID=gene-CD630_15150	ID=gene-CD630_15150;Name=pdcA;gbkey=Gene;gene=pdcA;gene_biotype=protein_coding;locus_tag=CD630_15150
gene16170	AM180355.1	3750556	3751206	-	gene	ID=gene-CD630_32040	ID=gene-CD630_32040;Name=CD630_32040;gbkey=Gene;gene_biotype=protein_coding;locus_tag=CD630_32040
gene16171	AM180355.1	3756839	3757489	+	gene	ID=gene-CD630_32110	ID=gene-CD630_32110;Name=CD630_32110;gbkey=Gene;gene_biotype=protein_coding;locus_tag=CD630_32110
gene16172	AM180355.1	4094058	4094720	-	gene	ID=gene-CD630_35030	ID=gene-CD630_35030;Name=CD630_35030;gbkey=Gene;gene_biotype=protein_coding;locus_tag=CD630_35030
gene16176	AM180355.1	739520	740101	-	gene	ID=gene-CD630_06150	ID=gene-CD630_06150;Name=CD630_06150;gbkey=Gene;gene_biotype=protein_coding;locus_tag=CD630_06150
gene16193	AM180355.1	565058	565684	-	gene	ID=gene-CD630_04750	ID=gene-CD630_04750;Name=CD630_04750;gbkey=Gene;gene_biotype=protein_coding;locus_tag=CD630_04750
gene16221	AM180355.1	4199134	4199721	-	gene	ID=gene-CD630_35930	ID=gene-CD630_35930;Name=CD630_35930;gbkey=Gene;gene_biotype=protein_coding;locus_tag=CD630_35930
gene16229	AM180355.1	2479600	2480244	-	gene	ID=gene-CD630_21430	ID=gene-CD630_21430;Name=CD630_21430;gbkey=Gene;gene_biotype=protein_coding;locus_tag=CD630_21430
gene16251	AM180355.1	959381	960028	+	gene	ID=gene-CD630_07860	ID=gene-CD630_07860;Name=CD630_07860;gbkey=Gene;gene_biotype=protein_coding;locus_tag=CD630_07860
gene16253	AM180355.1	2642323	2642970	-	gene	ID=gene-CD630_22770	ID=gene-CD630_22770;Name=CD630_22770;gbkey=Gene;gene_biotype=protein_coding;locus_tag=CD630_22770
gene16301	AM180355.1	751541	752122	+	gene	ID=gene-CD630_06280	ID=gene-CD630_06280;Name=CD630_06280;gbkey=Gene;gene_biotype=protein_coding;locus_tag=CD630_06280
gene16310	AM180355.1	3787544	3788179	-	gene	ID=gene-CD630_32350	ID=gene-CD630_32350;Name=ssb;gbkey=Gene;gene=ssb;gene_biotype=protein_coding;locus_tag=CD630_32350
gene16328	AM180355.1	963449	964093	+	gene	ID=gene-CD630_07910	ID=gene-CD630_07910;Name=CD630_07910;gbkey=Gene;gene_biotype=protein_coding;locus_tag=CD630_07910
gene16329	AM180355.1	2239584	2240228	-	gene	ID=gene-CD630_19420	ID=gene-CD630_19420;Name=trmB;gbkey=Gene;gene=trmB;gene_biotype=protein_coding;locus_tag=CD630_19420
gene16389	AM180355.1	2096885	2097526	+	gene	ID=gene-CD630_18140	ID=gene-CD630_18140;Name=CD630_18140;gbkey=Gene;gene_biotype=protein_coding;locus_tag=CD630_18140
gene16391	AM180355.1	2978625	2979266	-	gene	ID=gene-CD630_25740	ID=gene-CD630_25740;Name=thiN;gbkey=Gene;gene=thiN;gene_biotype=protein_coding;locus_tag=CD630_25740
gene16392	AM180355.1	3614324	3614965	+	gene	ID=gene-CD630_31060	ID=gene-CD630_31060;Name=CD630_31060;gbkey=Gene;gene_biotype=protein_coding;locus_tag=CD630_31060
gene16411	AM180355.1	1014736	1015422	+	gene	ID=gene-CD630_08390	ID=gene-CD630_08390;Name=CD630_08390;gbkey=Gene;gene_biotype=protein_coding;locus_tag=CD630_08390
gene16412	AM180355.1	1793557	1794123	-	gene	ID=gene-CD630_15450	ID=gene-CD630_15450;Name=CD630_15450;gbkey=Gene;gene_biotype=protein_coding;locus_tag=CD630_15450
gene1642	AM180355.1	1479494	1481581	+	gene	ID=gene-CD630_12740	ID=gene-CD630_12740;Name=topA;gbkey=Gene;gene=topA;gene_biotype=protein_coding;locus_tag=CD630_12740
gene16430	AM180355.1	1848789	1849415	+	gene	ID=gene-CD630_15930	ID=gene-CD630_15930;Name=kdpC;gbkey=Gene;gene=kdpC;gene_biotype=protein_coding;locus_tag=CD630_15930
gene16464	AM180355.1	552158	552796	-	gene	ID=gene-CD630_04630	ID=gene-CD630_04630;Name=CD630_04630;gbkey=Gene;gene_biotype=protein_coding;locus_tag=CD630_04630
gene16466	AM180355.1	2007160	2007798	+	gene	ID=gene-CD630_17320	ID=gene-CD630_17320;Name=CD630_17320;gbkey=Gene;gene_biotype=protein_coding;locus_tag=CD630_17320
gene16467	AM180355.1	2336655	2337293	+	gene	ID=gene-CD630_20250	ID=gene-CD630_20250;Name=CD630_20250;gbkey=Gene;gene_biotype=protein_coding;locus_tag=CD630_20250
gene16468	AM180355.1	2784876	2785514	-	gene	ID=gene-CD630_24120	ID=gene-CD630_24120;Name=CD630_24120;gbkey=Gene;gene_biotype=protein_coding;locus_tag=CD630_24120
gene16469	AM180355.1	2918012	2918650	+	gene	ID=gene-CD630_25250	ID=gene-CD630_25250;Name=recX;gbkey=Gene;gene=recX;gene_biotype=protein_coding;locus_tag=CD630_25250
gene16516	AM180355.1	881326	881958	+	gene	ID=gene-CD630_07190	ID=gene-CD630_07190;Name=fchA;gbkey=Gene;gene=fchA;gene_biotype=protein_coding;locus_tag=CD630_07190
gene16519	AM180355.1	2841793	2842413	-	gene	ID=gene-CD630_24620	ID=gene-CD630_24620;Name=grpE;gbkey=Gene;gene=grpE;gene_biotype=protein_coding;locus_tag=CD630_24620
gene16537	AM180355.1	161043	161600	+	gene	ID=gene-CD630_01180	ID=gene-CD630_01180;Name=CD630_01180;gbkey=Gene;gene_biotype=protein_coding;locus_tag=CD630_01180
gene16545	AM180355.1	1620994	1621629	-	gene	ID=gene-CD630_14010	ID=gene-CD630_14010;Name=CD630_14010;gbkey=Gene;gene_biotype=protein_coding;locus_tag=CD630_14010
gene16546	AM180355.1	3030985	3031620	-	gene	ID=gene-CD630_26240	ID=gene-CD630_26240;Name=CD630_26240;gbkey=Gene;gene_biotype=protein_coding;locus_tag=CD630_26240
gene16606	AM180355.1	1037298	1037927	+	gene	ID=gene-CD630_08600	ID=gene-CD630_08600;Name=CD630_08600;gbkey=Gene;gene_biotype=protein_coding;locus_tag=CD630_08600
gene16625	AM180355.1	227494	228126	+	gene	ID=gene-CD630_01710	ID=gene-CD630_01710;Name=rex;gbkey=Gene;gene=rex;gene_biotype=protein_coding;locus_tag=CD630_01710
gene16626	AM180355.1	1843830	1844462	+	gene	ID=gene-CD630_15900	ID=gene-CD630_15900;Name=CD630_15900;gbkey=Gene;gene_biotype=protein_coding;locus_tag=CD630_15900
gene16627	AM180355.1	1856405	1857037	+	gene	ID=gene-CD630_16010	ID=gene-CD630_16010;Name=thiE;gbkey=Gene;gene=thiE;gene_biotype=protein_coding;locus_tag=CD630_16010
gene16628	AM180355.1	2227347	2227979	+	gene	ID=gene-CD630_19290	ID=gene-CD630_19290;Name=CD630_19290;gbkey=Gene;gene_biotype=protein_coding;locus_tag=CD630_19290
gene16629	AM180355.1	2271214	2271846	-	gene	ID=gene-CD630_19700	ID=gene-CD630_19700;Name=CD630_19700;gbkey=Gene;gene_biotype=protein_coding;locus_tag=CD630_19700
gene16631	AM180355.1	4020749	4021381	-	gene	ID=gene-CD630_34300	ID=gene-CD630_34300;Name=cbiC;gbkey=Gene;gene=cbiC;gene_biotype=protein_coding;locus_tag=CD630_34300
gene1669	AM180355.1	3565624	3567702	-	gene	ID=gene-CD630_30710	ID=gene-CD630_30710;Name=CD630_30710;gbkey=Gene;gene_biotype=protein_coding;locus_tag=CD630_30710
gene167	AM180355.1	1511765	1516063	+	gene	ID=gene-CD630_13050	ID=gene-CD630_13050;Name=polC;gbkey=Gene;gene=polC;gene_biotype=protein_coding;gene_synonym=dnaF;locus_tag=CD630_13050
gene16705	AM180355.1	1146970	1147599	+	gene	ID=gene-CD630_09830	ID=gene-CD630_09830;Name=CD630_09830;gbkey=Gene;gene_biotype=protein_coding;locus_tag=CD630_09830
gene16706	AM180355.1	1601725	1602354	-	gene	ID=gene-CD630_13830	ID=gene-CD630_13830;Name=CD630_13830;gbkey=Gene;gene_biotype=protein_coding;locus_tag=CD630_13830
gene16707	AM180355.1	1895700	1896329	+	gene	ID=gene-CD630_16360	ID=gene-CD630_16360;Name=terD2;gbkey=Gene;gene=terD2;gene_biotype=protein_coding;locus_tag=CD630_16360
gene16708	AM180355.1	1955418	1956047	-	gene	ID=gene-CD630_16810	ID=gene-CD630_16810;Name=CD630_16810;gbkey=Gene;gene_biotype=protein_coding;locus_tag=CD630_16810
gene16709	AM180355.1	2220755	2221384	+	gene	ID=gene-CD630_19200	ID=gene-CD630_19200;Name=CD630_19200;gbkey=Gene;gene_biotype=protein_coding;locus_tag=CD630_19200
gene16710	AM180355.1	2487626	2488255	-	gene	ID=gene-CD630_21500	ID=gene-CD630_21500;Name=CD630_21500;gbkey=Gene;gene_biotype=protein_coding;locus_tag=CD630_21500
gene16711	AM180355.1	2977865	2978494	-	gene	ID=gene-CD630_25730	ID=gene-CD630_25730;Name=CD630_25730;gbkey=Gene;gene_biotype=protein_coding;locus_tag=CD630_25730
gene16712	AM180355.1	3278158	3278787	-	gene	ID=gene-CD630_28080	ID=gene-CD630_28080;Name=CD630_28080;gbkey=Gene;gene_biotype=protein_coding;locus_tag=CD630_28080
gene16713	AM180355.1	3475137	3475766	-	gene	ID=gene-CD630_29920	ID=gene-CD630_29920;Name=CD630_29920;gbkey=Gene;gene_biotype=protein_coding;locus_tag=CD630_29920
gene16716	AM180355.1	4067519	4068148	-	gene	ID=gene-CD630_34790	ID=gene-CD630_34790;Name=upp;gbkey=Gene;gene=upp;gene_biotype=protein_coding;locus_tag=CD630_34790
gene1675	AM180355.1	1846713	1848770	+	gene	ID=gene-CD630_15920	ID=gene-CD630_15920;Name=kdpB;gbkey=Gene;gene=kdpB;gene_biotype=protein_coding;locus_tag=CD630_15920
gene16765	AM180355.1	1888376	1888996	+	gene	ID=gene-CD630_16290	ID=gene-CD630_16290;Name=CD630_16290;gbkey=Gene;gene_biotype=protein_coding;locus_tag=CD630_16290
gene16784	AM180355.1	1796765	1797391	+	gene	ID=gene-CD630_15480	ID=gene-CD630_15480;Name=hisG;gbkey=Gene;gene=hisG;gene_biotype=protein_coding;locus_tag=CD630_15480
gene16785	AM180355.1	3476161	3476787	-	gene	ID=gene-CD630_29930	ID=gene-CD630_29930;Name=CD630_29930;gbkey=Gene;gene_biotype=protein_coding;locus_tag=CD630_29930
gene16786	AM180355.1	3616735	3617361	-	gene	ID=gene-CD630_31080	ID=gene-CD630_31080;Name=CD630_31080;gbkey=Gene;gene_biotype=protein_coding;locus_tag=CD630_31080
gene16815	AM180355.1	2056678	2057289	+	gene	ID=gene-CD630_17750	ID=gene-CD630_17750;Name=CD630_17750;gbkey=Gene;gene_biotype=protein_coding;locus_tag=CD630_17750
gene16828	AM180355.1	2625550	2626113	-	gene	ID=gene-CD630_22650	ID=gene-CD630_22650;Name=CD630_22650;gbkey=Gene;gene_biotype=protein_coding;locus_tag=CD630_22650
gene16844	AM180355.1	2480432	2481055	+	gene	ID=gene-CD630_21440	ID=gene-CD630_21440;Name=CD630_21440;gbkey=Gene;gene_biotype=protein_coding;locus_tag=CD630_21440
gene16866	AM180355.1	2340686	2341303	-	gene	ID=gene-CD630_20290	ID=gene-CD630_20290;Name=CD630_20290;gbkey=Gene;gene_biotype=protein_coding;locus_tag=CD630_20290
gene16888	AM180355.1	1950368	1950988	-	gene	ID=gene-CD630_16740	ID=gene-CD630_16740;Name=CD630_16740;gbkey=Gene;gene_biotype=protein_coding;locus_tag=CD630_16740
gene1693	AM180355.1	3079813	3081384	-	gene	ID=gene-CD630_26670	ID=gene-CD630_26670;Name=ptsG-BC;gbkey=Gene;gene=ptsG-BC;gene_biotype=protein_coding;locus_tag=CD630_26670
gene16957	AM180355.1	1397736	1398353	+	gene	ID=gene-CD630_11970	ID=gene-CD630_11970;Name=spoiIIIAF;gbkey=Gene;gene=spoiIIIAF;gene_biotype=protein_coding;locus_tag=CD630_11970
gene16958	AM180355.1	1878219	1878836	+	gene	ID=gene-CD630_16220	ID=gene-CD630_16220;Name=CD630_16220;gbkey=Gene;gene_biotype=protein_coding;locus_tag=CD630_16220
gene16959	AM180355.1	1984845	1985453	+	gene	ID=gene-CD630_17090	ID=gene-CD630_17090;Name=mobA;gbkey=Gene;gene=mobA;gene_biotype=protein_coding;locus_tag=CD630_17090
gene16960	AM180355.1	2369254	2369901	-	gene	ID=gene-CD630_20550	ID=gene-CD630_20550;Name=CD630_20550;gbkey=Gene;gene_biotype=protein_coding;locus_tag=CD630_20550
gene16961	AM180355.1	2994173	2994790	-	gene	ID=gene-CD630_25880	ID=gene-CD630_25880;Name=gmk;gbkey=Gene;gene=gmk;gene_biotype=protein_coding;locus_tag=CD630_25880
gene16963	AM180355.1	4219997	4220614	-	gene	ID=gene-CD630_36140	ID=gene-CD630_36140;Name=CD630_36140;gbkey=Gene;gene_biotype=protein_coding;locus_tag=CD630_36140
gene16964	AM180355.1	4228641	4229258	-	gene	ID=gene-CD630_36230	ID=gene-CD630_36230;Name=CD630_36230;gbkey=Gene;gene_biotype=protein_coding;locus_tag=CD630_36230
gene16992	AM180355.1	3182464	3183078	-	gene	ID=gene-CD630_27420	ID=gene-CD630_27420;Name=CD630_27420;gbkey=Gene;gene_biotype=protein_coding;locus_tag=CD630_27420
gene17021	AM180355.1	647386	647982	+	gene	ID=gene-CD630_05420	ID=gene-CD630_05420;Name=cheB;gbkey=Gene;gene=cheB;gene_biotype=protein_coding;locus_tag=CD630_05420
gene17077	AM180355.1	3040425	3041039	-	gene	ID=gene-CD630_26310	ID=gene-CD630_26310;Name=CD630_26310;gbkey=Gene;gene_biotype=protein_coding;locus_tag=CD630_26310
gene17078	AM180355.1	3698796	3699410	+	gene	ID=gene-CD630_31650	ID=gene-CD630_31650;Name=CD630_31650;gbkey=Gene;gene_biotype=protein_coding;locus_tag=CD630_31650
gene17079	AM180355.1	4027622	4028236	-	gene	ID=gene-CD630_34360	ID=gene-CD630_34360;Name=cobC;gbkey=Gene;gene=cobC;gene_biotype=protein_coding;locus_tag=CD630_34360
gene1710	AM180355.1	2808178	2810244	-	gene	ID=gene-CD630_24320	ID=gene-CD630_24320;Name=glyS;gbkey=Gene;gene=glyS;gene_biotype=protein_coding;locus_tag=CD630_24320
gene17138	AM180355.1	650099	650710	+	gene	ID=gene-CD630_05450	ID=gene-CD630_05450;Name=CD630_05450;gbkey=Gene;gene_biotype=protein_coding;locus_tag=CD630_05450
gene17139	AM180355.1	2288110	2288721	+	gene	ID=gene-CD630_19840	ID=gene-CD630_19840;Name=CD630_19840;gbkey=Gene;gene_biotype=protein_coding;locus_tag=CD630_19840
gene17140	AM180355.1	3863570	3864154	-	gene	ID=gene-CD630_33000	ID=gene-CD630_33000;Name=engB;gbkey=Gene;gene=engB;gene_biotype=protein_coding;locus_tag=CD630_33000
gene1716	AM180355.1	1868993	1871053	+	gene	ID=gene-CD630_16150	ID=gene-CD630_16150;Name=CD630_16150;gbkey=Gene;gene_biotype=protein_coding;locus_tag=CD630_16150
gene1718	AM180355.1	914910	916976	+	gene	ID=gene-CD630_07490	ID=gene-CD630_07490;Name=CD630_07490;gbkey=Gene;gene_biotype=protein_coding;locus_tag=CD630_07490
gene17191	AM180355.1	1329231	1329833	+	gene	ID=gene-CD630_11290	ID=gene-CD630_11290;Name=coaE;gbkey=Gene;gene=coaE;gene_biotype=protein_coding;locus_tag=CD630_11290
gene17205	AM180355.1	382386	382994	+	gene	ID=gene-CD630_03140	ID=gene-CD630_03140;Name=CD630_03140;gbkey=Gene;gene_biotype=protein_coding;locus_tag=CD630_03140
gene17206	AM180355.1	2042385	2042993	+	gene	ID=gene-CD630_17650	ID=gene-CD630_17650;Name=CD630_17650;gbkey=Gene;gene_biotype=protein_coding;locus_tag=CD630_17650
gene17207	AM180355.1	3103383	3103997	-	gene	ID=gene-CD630_26840	ID=gene-CD630_26840;Name=CD630_26840;gbkey=Gene;gene_biotype=protein_coding;locus_tag=CD630_26840
gene17208	AM180355.1	4018909	4019517	-	gene	ID=gene-CD630_34280	ID=gene-CD630_34280;Name=cbiE;gbkey=Gene;gene=cbiE;gene_biotype=protein_coding;locus_tag=CD630_34280
gene17235	AM180355.1	197001	197579	+	gene	ID=gene-CD630_01470	ID=gene-CD630_01470;Name=CD630_01470;gbkey=Gene;gene_biotype=protein_coding;locus_tag=CD630_01470
gene1727	AM180355.1	2959676	2961736	-	gene	ID=gene-CD630_25600	ID=gene-CD630_25600;Name=recG;gbkey=Gene;gene=recG;gene_biotype=protein_coding;locus_tag=CD630_25600
gene17285	AM180355.1	695032	695637	+	gene	ID=gene-CD630_05810	ID=gene-CD630_05810;Name=CD630_05810;gbkey=Gene;gene_biotype=protein_coding;locus_tag=CD630_05810
gene17286	AM180355.1	1419074	1419679	+	gene	ID=gene-CD630_12210	ID=gene-CD630_12210;Name=CD630_12210;gbkey=Gene;gene_biotype=protein_coding;locus_tag=CD630_12210
gene17287	AM180355.1	1799057	1799662	+	gene	ID=gene-CD630_15510	ID=gene-CD630_15510;Name=hisH;gbkey=Gene;gene=hisH;gene_biotype=protein_coding;locus_tag=CD630_15510
gene17350	AM180355.1	681844	682446	+	gene	ID=gene-CD630_05730	ID=gene-CD630_05730;Name=CD630_05730;gbkey=Gene;gene_biotype=protein_coding;locus_tag=CD630_05730
gene17351	AM180355.1	2090366	2090968	-	gene	ID=gene-CD630_18070	ID=gene-CD630_18070;Name=CD630_18070;gbkey=Gene;gene_biotype=protein_coding;locus_tag=CD630_18070
gene17353	AM180355.1	2811282	2811884	-	gene	ID=gene-CD630_24340	ID=gene-CD630_24340;Name=CD630_24340;gbkey=Gene;gene_biotype=protein_coding;locus_tag=CD630_24340
gene17354	AM180355.1	3276742	3277344	-	gene	ID=gene-CD630_28060	ID=gene-CD630_28060;Name=ruvA;gbkey=Gene;gene=ruvA;gene_biotype=protein_coding;locus_tag=CD630_28060
gene17355	AM180355.1	4276359	4276961	-	gene	ID=gene-CD630_36670	ID=gene-CD630_36670;Name=CD630_36670;gbkey=Gene;gene_biotype=protein_coding;locus_tag=CD630_36670
gene17377	AM180355.1	1721558	1722157	+	gene	ID=gene-CD630_14860	ID=gene-CD630_14860;Name=CD630_14860;gbkey=Gene;gene_biotype=protein_coding;locus_tag=CD630_14860
gene17439	AM180355.1	22529	23128	+	gene	ID=gene-CD630_00180	ID=gene-CD630_00180;Name=recR;gbkey=Gene;gene=recR;gene_biotype=protein_coding;locus_tag=CD630_00180
gene17440	AM180355.1	1332581	1333180	+	gene	ID=gene-CD630_11330	ID=gene-CD630_11330;Name=CD630_11330;gbkey=Gene;gene_biotype=protein_coding;locus_tag=CD630_11330
gene17441	AM180355.1	1661691	1662290	+	gene	ID=gene-CD630_14320	ID=gene-CD630_14320;Name=CD630_14320;gbkey=Gene;gene_biotype=protein_coding;locus_tag=CD630_14320
gene1745	AM180355.1	771590	773599	+	gene	ID=gene-CD630_06490	ID=gene-CD630_06490;Name=CD630_06490;gbkey=Gene;gene_biotype=protein_coding;locus_tag=CD630_06490
gene1749	AM180355.1	3347037	3349082	-	gene	ID=gene-CD630_28630	ID=gene-CD630_28630;Name=CD630_28630;gbkey=Gene;gene_biotype=protein_coding;locus_tag=CD630_28630
gene17511	AM180355.1	463846	464442	-	gene	ID=gene-CD630_03920	ID=gene-CD630_03920;Name=CD630_03920;gbkey=Gene;gene_biotype=protein_coding;locus_tag=CD630_03920
gene17514	AM180355.1	1720716	1721312	-	gene	ID=gene-CD630_14850	ID=gene-CD630_14850;Name=CD630_14850;gbkey=Gene;gene_biotype=protein_coding;locus_tag=CD630_14850
gene17515	AM180355.1	2099550	2100146	+	gene	ID=gene-CD630_18170	ID=gene-CD630_18170;Name=CD630_18170;gbkey=Gene;gene_biotype=protein_coding;locus_tag=CD630_18170
gene17516	AM180355.1	2334037	2334633	-	gene	ID=gene-CD630_20210	ID=gene-CD630_20210;Name=CD630_20210;gbkey=Gene;gene_biotype=protein_coding;locus_tag=CD630_20210
gene17602	AM180355.1	285346	285939	+	gene	ID=gene-CD630_02220	ID=gene-CD630_02220;Name=purN;gbkey=Gene;gene=purN;gene_biotype=protein_coding;locus_tag=CD630_02220
gene17603	AM180355.1	1339375	1339968	+	gene	ID=gene-CD630_11400	ID=gene-CD630_11400;Name=rnfE;gbkey=Gene;gene=rnfE;gene_biotype=protein_coding;locus_tag=CD630_11400
gene17604	AM180355.1	1620152	1620745	+	gene	ID=gene-CD630_14000	ID=gene-CD630_14000;Name=CD630_14000;gbkey=Gene;gene_biotype=protein_coding;locus_tag=CD630_14000
gene17605	AM180355.1	1668362	1668955	+	pseudogene	ID=gene-CD630_14370	ID=gene-CD630_14370;Name=CD630_14370;gbkey=Gene;gene_biotype=pseudogene;locus_tag=CD630_14370;pseudo=true;pseudogene=unknown
gene17606	AM180355.1	3752057	3752650	+	gene	ID=gene-CD630_32050	ID=gene-CD630_32050;Name=CD630_32050;gbkey=Gene;gene_biotype=protein_coding;locus_tag=CD630_32050
gene1765	AM180355.1	1815272	1817308	+	gene	ID=gene-CD630_15680	ID=gene-CD630_15680;Name=CD630_15680;gbkey=Gene;gene_biotype=protein_coding;locus_tag=CD630_15680
gene17673	AM180355.1	853165	853755	+	gene	ID=gene-CD630_07010	ID=gene-CD630_07010;Name=CD630_07010;gbkey=Gene;gene_biotype=protein_coding;locus_tag=CD630_07010
gene17674	AM180355.1	1825073	1825663	+	gene	ID=gene-CD630_15760	ID=gene-CD630_15760;Name=CD630_15760;gbkey=Gene;gene_biotype=protein_coding;locus_tag=CD630_15760
gene17675	AM180355.1	1850587	1851177	+	gene	ID=gene-CD630_15950	ID=gene-CD630_15950;Name=cysE;gbkey=Gene;gene=cysE;gene_biotype=protein_coding;locus_tag=CD630_15950
gene17676	AM180355.1	3448784	3449374	-	gene	ID=gene-CD630_29670	ID=gene-CD630_29670;Name=spoVFB;gbkey=Gene;gene=spoVFB;gene_biotype=protein_coding;locus_tag=CD630_29670
gene17677	AM180355.1	4056715	4057305	-	gene	ID=gene-CD630_34640	ID=gene-CD630_34640;Name=CD630_34640;gbkey=Gene;gene_biotype=protein_coding;locus_tag=CD630_34640
gene17678	AM180355.1	4156716	4157306	-	gene	ID=gene-CD630_35560	ID=gene-CD630_35560;Name=CD630_35560;gbkey=Gene;gene_biotype=protein_coding;locus_tag=CD630_35560
gene17695	AM180355.1	1731280	1731864	+	gene	ID=gene-CD630_14940	ID=gene-CD630_14940;Name=CD630_14940;gbkey=Gene;gene_biotype=protein_coding;locus_tag=CD630_14940
gene17745	AM180355.1	2264832	2265419	-	gene	ID=gene-CD630_19640	ID=gene-CD630_19640;Name=CD630_19640;gbkey=Gene;gene_biotype=protein_coding;locus_tag=CD630_19640
gene17746	AM180355.1	3326938	3327525	+	gene	ID=gene-CD630_28450	ID=gene-CD630_28450;Name=rbr1;gbkey=Gene;gene=rbr1;gene_biotype=protein_coding;locus_tag=CD630_28450
gene17807	AM180355.1	2362731	2363309	-	gene	ID=gene-CD630_20490	ID=gene-CD630_20490;Name=CD630_20490;gbkey=Gene;gene_biotype=protein_coding;locus_tag=CD630_20490
gene1781	AM180355.1	3873274	3875298	-	gene	ID=gene-CD630_33090	ID=gene-CD630_33090;Name=ligA;gbkey=Gene;gene=ligA;gene_biotype=protein_coding;locus_tag=CD630_33090
gene17815	AM180355.1	245187	245771	+	gene	ID=gene-CD630_01870	ID=gene-CD630_01870;Name=pyrE;gbkey=Gene;gene=pyrE;gene_biotype=protein_coding;locus_tag=CD630_01870
gene17816	AM180355.1	1341765	1342349	+	gene	ID=gene-CD630_11430	ID=gene-CD630_11430;Name=CD630_11430;gbkey=Gene;gene_biotype=protein_coding;locus_tag=CD630_11430
gene17817	AM180355.1	1635501	1636085	-	gene	ID=gene-CD630_14110	ID=gene-CD630_14110;Name=CD630_14110;gbkey=Gene;gene_biotype=protein_coding;locus_tag=CD630_14110
gene17818	AM180355.1	1676146	1676730	+	gene	ID=gene-CD630_14450	ID=gene-CD630_14450;Name=pabA;gbkey=Gene;gene=pabA;gene_biotype=protein_coding;locus_tag=CD630_14450
gene1782	AM180355.1	268442	270472	+	gene	ID=gene-CD630_02050	ID=gene-CD630_02050;Name=CD630_02050;gbkey=Gene;gene_biotype=protein_coding;locus_tag=CD630_02050
gene17821	AM180355.1	3869081	3869665	-	gene	ID=gene-CD630_33050	ID=gene-CD630_33050;Name=clpP1;gbkey=Gene;gene=clpP1;gene_biotype=protein_coding;locus_tag=CD630_33050
gene17822	AM180355.1	3915756	3916340	-	gene	ID=gene-CD630_33510	ID=gene-CD630_33510;Name=clpP2;gbkey=Gene;gene=clpP2;gene_biotype=protein_coding;locus_tag=CD630_33510
gene17852	AM180355.1	4137238	4137822	-	gene	ID=gene-CD630_35420	ID=gene-CD630_35420;Name=spmA;gbkey=Gene;gene=spmA;gene_biotype=protein_coding;locus_tag=CD630_35420
gene17870	AM180355.1	2959063	2959617	-	gene	ID=gene-CD630_25590	ID=gene-CD630_25590;Name=CD630_25590;gbkey=Gene;gene_biotype=protein_coding;locus_tag=CD630_25590
gene17892	AM180355.1	842615	843196	+	gene	ID=gene-CD630_06940	ID=gene-CD630_06940;Name=CD630_06940;gbkey=Gene;gene_biotype=protein_coding;locus_tag=CD630_06940
gene17893	AM180355.1	2080446	2081027	-	gene	ID=gene-CD630_17990	ID=gene-CD630_17990;Name=terD3;gbkey=Gene;gene=terD3;gene_biotype=protein_coding;locus_tag=CD630_17990
gene17956	AM180355.1	665986	666549	+	gene	ID=gene-CD630_05590	ID=gene-CD630_05590;Name=CD630_05590;gbkey=Gene;gene_biotype=protein_coding;locus_tag=CD630_05590
gene17982	AM180355.1	3211405	3211875	+	gene	ID=gene-CD630_27630	ID=gene-CD630_27630;Name=CD630_27630;gbkey=Gene;gene_biotype=protein_coding;locus_tag=CD630_27630
gene17984	AM180355.1	858043	858621	+	gene	ID=gene-CD630_07040	ID=gene-CD630_07040;Name=CD630_07040;gbkey=Gene;gene_biotype=protein_coding;locus_tag=CD630_07040
gene17985	AM180355.1	1798477	1799055	+	gene	ID=gene-CD630_15500	ID=gene-CD630_15500;Name=hisB;gbkey=Gene;gene=hisB;gene_biotype=protein_coding;locus_tag=CD630_15500
gene17986	AM180355.1	1894419	1894997	+	gene	ID=gene-CD630_16340	ID=gene-CD630_16340;Name=terD;gbkey=Gene;gene=terD;gene_biotype=protein_coding;locus_tag=CD630_16340
gene17987	AM180355.1	1895036	1895614	+	gene	ID=gene-CD630_16350	ID=gene-CD630_16350;Name=terD1;gbkey=Gene;gene=terD1;gene_biotype=protein_coding;locus_tag=CD630_16350
gene17988	AM180355.1	3193184	3193762	-	gene	ID=gene-CD630_27500	ID=gene-CD630_27500;Name=agrB;gbkey=Gene;gene=agrB;gene_biotype=protein_coding;locus_tag=CD630_27500
gene18007	AM180355.1	4018344	4018919	-	gene	ID=gene-CD630_34270	ID=gene-CD630_34270;Name=cbiT;gbkey=Gene;gene=cbiT;gene_biotype=protein_coding;locus_tag=CD630_34270
gene18039	AM180355.1	2354783	2355340	-	gene	ID=gene-CD630_20420	ID=gene-CD630_20420;Name=CD630_20420;gbkey=Gene;gene_biotype=protein_coding;locus_tag=CD630_20420
gene1804	AM180355.1	3236313	3238340	-	gene	ID=gene-CD630_27840	ID=gene-CD630_27840;Name=cwp6;gbkey=Gene;gene=cwp6;gene_biotype=protein_coding;locus_tag=CD630_27840
gene18049	AM180355.1	1339983	1340558	+	gene	ID=gene-CD630_11410	ID=gene-CD630_11410;Name=rnfA;gbkey=Gene;gene=rnfA;gene_biotype=protein_coding;locus_tag=CD630_11410
gene18050	AM180355.1	2210754	2211329	+	gene	ID=gene-CD630_19100	ID=gene-CD630_19100;Name=eutV;gbkey=Gene;gene=eutV;gene_biotype=protein_coding;locus_tag=CD630_19100
gene18051	AM180355.1	2378633	2379208	-	gene	ID=gene-CD630_20630	ID=gene-CD630_20630;Name=CD630_20630;gbkey=Gene;gene_biotype=protein_coding;locus_tag=CD630_20630
gene18052	AM180355.1	2745741	2746316	-	gene	ID=gene-CD630_23800	ID=gene-CD630_23800;Name=iorB;gbkey=Gene;gene=iorB;gene_biotype=protein_coding;locus_tag=CD630_23800
gene18055	AM180355.1	4278618	4279193	+	gene	ID=gene-CD630_36690	ID=gene-CD630_36690;Name=CD630_36690;gbkey=Gene;gene_biotype=protein_coding;locus_tag=CD630_36690
gene18079	AM180355.1	464469	464996	-	gene	ID=gene-CD630_03930	ID=gene-CD630_03930;Name=CD630_03930;gbkey=Gene;gene_biotype=protein_coding;locus_tag=CD630_03930
gene18085	AM180355.1	2565482	2566048	-	gene	ID=gene-CD630_22130	ID=gene-CD630_22130;Name=cynT;gbkey=Gene;gene=cynT;gene_biotype=protein_coding;locus_tag=CD630_22130
gene18108	AM180355.1	721375	721947	+	gene	ID=gene-CD630_05980	ID=gene-CD630_05980;Name=cotCB;gbkey=Gene;gene=cotCB;gene_biotype=protein_coding;locus_tag=CD630_05980
gene18110	AM180355.1	1679575	1680147	+	gene	ID=gene-CD630_14490	ID=gene-CD630_14490;Name=folE;gbkey=Gene;gene=folE;gene_biotype=protein_coding;locus_tag=CD630_14490
gene18112	AM180355.1	2693929	2694501	-	gene	ID=gene-CD630_23300	ID=gene-CD630_23300;Name=xpt;gbkey=Gene;gene=xpt;gene_biotype=protein_coding;locus_tag=CD630_23300
gene18113	AM180355.1	2769021	2769593	+	gene	ID=gene-CD630_24010	ID=gene-CD630_24010;Name=cotD;gbkey=Gene;gene=cotD;gene_biotype=protein_coding;locus_tag=CD630_24010
gene18114	AM180355.1	2916474	2917046	-	gene	ID=gene-CD630_25230	ID=gene-CD630_25230;Name=CD630_25230;gbkey=Gene;gene_biotype=protein_coding;locus_tag=CD630_25230
gene18115	AM180355.1	3022231	3022803	+	gene	ID=gene-CD630_26150	ID=gene-CD630_26150;Name=CD630_26150;gbkey=Gene;gene_biotype=protein_coding;locus_tag=CD630_26150
gene18134	AM180355.1	4178831	4179400	-	gene	ID=gene-CD630_35780	ID=gene-CD630_35780;Name=CD630_35780;gbkey=Gene;gene_biotype=protein_coding;locus_tag=CD630_35780
gene18166	AM180355.1	1365680	1366252	-	gene	ID=gene-CD630_11670	ID=gene-CD630_11670;Name=CD630_11670;gbkey=Gene;gene_biotype=protein_coding;locus_tag=CD630_11670
gene18182	AM180355.1	1274778	1275311	+	gene	ID=gene-CD630_10820	ID=gene-CD630_10820;Name=mobB;gbkey=Gene;gene=mobB;gene_biotype=protein_coding;locus_tag=CD630_10820
gene1821	AM180355.1	2579494	2581515	-	gene	ID=gene-CD630_22290	ID=gene-CD630_22290;Name=CD630_22290;gbkey=Gene;gene_biotype=protein_coding;locus_tag=CD630_22290
gene18214	AM180355.1	4029039	4029599	-	gene	ID=gene-CD630_34380	ID=gene-CD630_34380;Name=cobU;gbkey=Gene;gene=cobU;gene_biotype=protein_coding;locus_tag=CD630_34380
gene18218	AM180355.1	689963	690532	-	gene	ID=gene-CD630_05770	ID=gene-CD630_05770;Name=CD630_05770;gbkey=Gene;gene_biotype=protein_coding;locus_tag=CD630_05770
gene18219	AM180355.1	731290	731859	+	gene	ID=gene-CD630_06090	ID=gene-CD630_06090;Name=CD630_06090;gbkey=Gene;gene_biotype=protein_coding;locus_tag=CD630_06090
gene18221	AM180355.1	1241996	1242565	-	gene	ID=gene-CD630_10480	ID=gene-CD630_10480;Name=CD630_10480;gbkey=Gene;gene_biotype=protein_coding;locus_tag=CD630_10480
gene18222	AM180355.1	1338793	1339362	+	gene	ID=gene-CD630_11390	ID=gene-CD630_11390;Name=rnfG;gbkey=Gene;gene=rnfG;gene_biotype=protein_coding;locus_tag=CD630_11390
gene18223	AM180355.1	2385916	2386494	-	gene	ID=gene-CD630_20700	ID=gene-CD630_20700;Name=CD630_20700;gbkey=Gene;gene_biotype=protein_coding;locus_tag=CD630_20700
gene18224	AM180355.1	3102742	3103311	-	gene	ID=gene-CD630_26830	ID=gene-CD630_26830;Name=CD630_26830;gbkey=Gene;gene_biotype=protein_coding;locus_tag=CD630_26830
gene18226	AM180355.1	3786791	3787360	-	gene	ID=gene-CD630_32340	ID=gene-CD630_32340;Name=CD630_32340;gbkey=Gene;gene_biotype=protein_coding;locus_tag=CD630_32340
gene18228	AM180355.1	4050029	4050598	+	gene	ID=gene-CD630_34560	ID=gene-CD630_34560;Name=CD630_34560;gbkey=Gene;gene_biotype=protein_coding;locus_tag=CD630_34560
gene18242	AM180355.1	2081067	2081633	-	gene	ID=gene-CD630_18000	ID=gene-CD630_18000;Name=terD4;gbkey=Gene;gene=terD4;gene_biotype=protein_coding;locus_tag=CD630_18000
gene18270	AM180355.1	2819811	2820374	-	gene	ID=gene-CD630_24440	ID=gene-CD630_24440;Name=CD630_24440;gbkey=Gene;gene_biotype=protein_coding;locus_tag=CD630_24440
gene18301	AM180355.1	3569188	3569754	+	gene	ID=gene-CD630_30730	ID=gene-CD630_30730;Name=CD630_30730;gbkey=Gene;gene_biotype=protein_coding;locus_tag=CD630_30730
gene18302	AM180355.1	1606932	1607497	-	gene	ID=gene-CD630_13880	ID=gene-CD630_13880;Name=CD630_13880;gbkey=Gene;gene_biotype=protein_coding;locus_tag=CD630_13880
gene18304	AM180355.1	260537	261058	+	gene	ID=gene-CD630_02010	ID=gene-CD630_02010;Name=CD630_02010;gbkey=Gene;gene_biotype=protein_coding;locus_tag=CD630_02010
gene18348	AM180355.1	4098874	4099443	-	gene	ID=gene-CD630_35080	ID=gene-CD630_35080;Name=CD630_35080;gbkey=Gene;gene_biotype=protein_coding;locus_tag=CD630_35080
gene1835	AM180355.1	3823265	3825292	-	gene	ID=gene-CD630_32660	ID=gene-CD630_32660;Name=CD630_32660;gbkey=Gene;gene_biotype=protein_coding;locus_tag=CD630_32660
gene18391	AM180355.1	1957526	1958089	+	gene	ID=gene-CD630_16830	ID=gene-CD630_16830;Name=CD630_16830;gbkey=Gene;gene_biotype=protein_coding;locus_tag=CD630_16830
gene18392	AM180355.1	2372138	2372704	-	gene	ID=gene-CD630_20570	ID=gene-CD630_20570;Name=CD630_20570;gbkey=Gene;gene_biotype=protein_coding;locus_tag=CD630_20570
gene18393	AM180355.1	3435661	3436224	-	gene	ID=gene-CD630_29580	ID=gene-CD630_29580;Name=atpE;gbkey=Gene;gene=atpE;gene_biotype=protein_coding;locus_tag=CD630_29580
gene184	AM180355.1	2047379	2051632	+	gene	ID=gene-CD630_17690	ID=gene-CD630_17690;Name=CD630_17690;gbkey=Gene;gene_biotype=protein_coding;locus_tag=CD630_17690
gene18456	AM180355.1	2249417	2249974	-	gene	ID=gene-CD630_19510	ID=gene-CD630_19510;Name=CD630_19510;gbkey=Gene;gene_biotype=protein_coding;locus_tag=CD630_19510
gene1846	AM180355.1	3596426	3598435	-	gene	ID=gene-CD630_30940	ID=gene-CD630_30940;Name=CD630_30940;gbkey=Gene;gene_biotype=protein_coding;locus_tag=CD630_30940
gene18463	AM180355.1	425143	425703	+	gene	ID=gene-CD630_03500	ID=gene-CD630_03500;Name=CD630_03500;gbkey=Gene;gene_biotype=protein_coding;locus_tag=CD630_03500
gene18465	AM180355.1	4093484	4094044	-	gene	ID=gene-CD630_35020	ID=gene-CD630_35020;Name=pth;gbkey=Gene;gene=pth;gene_biotype=protein_coding;locus_tag=CD630_35020
gene18501	AM180355.1	188593	189144	+	gene	ID=gene-CD630_01420	ID=gene-CD630_01420;Name=CD630_01420;gbkey=Gene;gene_biotype=protein_coding;locus_tag=CD630_01420
gene18510	AM180355.1	3452891	3453436	-	gene	ID=gene-CD630_29710	ID=gene-CD630_29710;Name=bioY;gbkey=Gene;gene=bioY;gene_biotype=protein_coding;locus_tag=CD630_29710
gene1853	AM180355.1	2918803	2920806	+	gene	ID=gene-CD630_25260	ID=gene-CD630_25260;Name=glgB;gbkey=Gene;gene=glgB;gene_biotype=protein_coding;locus_tag=CD630_25260
gene18539	AM180355.1	1048546	1049103	+	gene	ID=gene-CD630_08720	ID=gene-CD630_08720;Name=maa;gbkey=Gene;gene=maa;gene_biotype=protein_coding;locus_tag=CD630_08720
gene18540	AM180355.1	1377682	1378239	+	gene	ID=gene-CD630_11770	ID=gene-CD630_11770;Name=fapR;gbkey=Gene;gene=fapR;gene_biotype=protein_coding;locus_tag=CD630_11770
gene18541	AM180355.1	1447651	1448208	+	gene	ID=gene-CD630_12460	ID=gene-CD630_12460;Name=efp;gbkey=Gene;gene=efp;gene_biotype=protein_coding;locus_tag=CD630_12460
gene18542	AM180355.1	2473758	2474315	-	gene	ID=gene-CD630_21370	ID=gene-CD630_21370;Name=rrf;gbkey=Gene;gene=rrf;gene_biotype=protein_coding;locus_tag=CD630_21370
gene18581	AM180355.1	2545342	2545881	-	gene	ID=gene-CD630_21970	ID=gene-CD630_21970;Name=CD630_21970;gbkey=Gene;gene_biotype=protein_coding;locus_tag=CD630_21970
gene1859	AM180355.1	1386557	1388557	+	gene	ID=gene-CD630_11860	ID=gene-CD630_11860;Name=CD630_11860;gbkey=Gene;gene_biotype=protein_coding;locus_tag=CD630_11860
gene18591	AM180355.1	1245123	1245665	+	gene	ID=gene-CD630_10520	ID=gene-CD630_10520;Name=CD630_10520;gbkey=Gene;gene_biotype=protein_coding;locus_tag=CD630_10520
gene18602	AM180355.1	398605	399129	+	gene	ID=gene-CD630_03310	ID=gene-CD630_03310;Name=ppiB;gbkey=Gene;gene=ppiB;gene_biotype=protein_coding;locus_tag=CD630_03310
gene18610	AM180355.1	1329826	1330380	+	gene	ID=gene-CD630_11300	ID=gene-CD630_11300;Name=CD630_11300;gbkey=Gene;gene_biotype=protein_coding;locus_tag=CD630_11300
gene18611	AM180355.1	1398365	1398919	+	gene	ID=gene-CD630_11980	ID=gene-CD630_11980;Name=spoIIIAG;gbkey=Gene;gene=spoIIIAG;gene_biotype=protein_coding;locus_tag=CD630_11980
gene18612	AM180355.1	1906296	1906859	-	gene	ID=gene-CD630_16440	ID=gene-CD630_16440;Name=CD630_16440;gbkey=Gene;gene_biotype=protein_coding;locus_tag=CD630_16440
gene18674	AM180355.1	426451	427002	+	gene	ID=gene-CD630_03520	ID=gene-CD630_03520;Name=CD630_03520;gbkey=Gene;gene_biotype=protein_coding;locus_tag=CD630_03520
gene18677	AM180355.1	1319390	1319941	+	gene	ID=gene-CD630_11220	ID=gene-CD630_11220;Name=CD630_11220;gbkey=Gene;gene_biotype=protein_coding;locus_tag=CD630_11220
gene18678	AM180355.1	1937730	1938281	-	gene	ID=gene-CD630_16640	ID=gene-CD630_16640;Name=CD630_16640;gbkey=Gene;gene_biotype=protein_coding;locus_tag=CD630_16640
gene18679	AM180355.1	2222429	2222980	+	gene	ID=gene-CD630_19230	ID=gene-CD630_19230;Name=CD630_19230;gbkey=Gene;gene_biotype=protein_coding;locus_tag=CD630_19230
gene18680	AM180355.1	2293712	2294263	-	gene	ID=gene-CD630_19880	ID=gene-CD630_19880;Name=CD630_19880;gbkey=Gene;gene_biotype=protein_coding;locus_tag=CD630_19880
gene18681	AM180355.1	3880411	3880962	-	gene	ID=gene-CD630_33150	ID=gene-CD630_33150;Name=hydN2;gbkey=Gene;gene=hydN2;gene_biotype=protein_coding;locus_tag=CD630_33150
gene1871	AM180355.1	4269884	4271878	-	gene	ID=gene-CD630_36590	ID=gene-CD630_36590;Name=CD630_36590;gbkey=Gene;gene_biotype=protein_coding;locus_tag=CD630_36590
gene1872	AM180355.1	2012365	2014359	+	gene	ID=gene-CD630_17380	ID=gene-CD630_17380;Name=CD630_17380;gbkey=Gene;gene_biotype=protein_coding;locus_tag=CD630_17380
gene18747	AM180355.1	1173005	1173553	+	gene	ID=gene-CD630_10040	ID=gene-CD630_10040;Name=fumB;gbkey=Gene;gene=fumB;gene_biotype=protein_coding;locus_tag=CD630_10040
gene18748	AM180355.1	1640302	1640850	-	gene	ID=gene-CD630_14150	ID=gene-CD630_14150;Name=CD630_14150;gbkey=Gene;gene_biotype=protein_coding;locus_tag=CD630_14150
gene18811	AM180355.1	832696	833226	+	gene	ID=gene-CD630_06880	ID=gene-CD630_06880;Name=CD630_06880;gbkey=Gene;gene_biotype=protein_coding;locus_tag=CD630_06880
gene18812	AM180355.1	2010258	2010803	-	gene	ID=gene-CD630_17360	ID=gene-CD630_17360;Name=CD630_17360;gbkey=Gene;gene_biotype=protein_coding;locus_tag=CD630_17360
gene18813	AM180355.1	2791319	2791864	-	gene	ID=gene-CD630_24180	ID=gene-CD630_24180;Name=CD630_24180;gbkey=Gene;gene_biotype=protein_coding;locus_tag=CD630_24180
gene18815	AM180355.1	4062739	4063284	-	gene	ID=gene-CD630_34710	ID=gene-CD630_34710;Name=atpF1;gbkey=Gene;gene=atpF1;gene_biotype=protein_coding;locus_tag=CD630_34710
gene1882	AM180355.1	2749687	2751678	-	gene	ID=gene-CD630_23830	ID=gene-CD630_23830;Name=CD630_23830;gbkey=Gene;gene_biotype=protein_coding;locus_tag=CD630_23830
gene1883	AM180355.1	3142976	3144967	-	gene	ID=gene-CD630_27160	ID=gene-CD630_27160;Name=CD630_27160;gbkey=Gene;gene_biotype=protein_coding;locus_tag=CD630_27160
gene18871	AM180355.1	1889162	1889698	-	gene	ID=gene-CD630_16300	ID=gene-CD630_16300;Name=CD630_16300;gbkey=Gene;gene_biotype=protein_coding;locus_tag=CD630_16300
gene18902	AM180355.1	1539080	1539622	+	gene	ID=gene-CD630_13270	ID=gene-CD630_13270;Name=pgsA;gbkey=Gene;gene=pgsA;gene_biotype=protein_coding;locus_tag=CD630_13270
gene18903	AM180355.1	1599311	1599853	-	gene	ID=gene-CD630_13810	ID=gene-CD630_13810;Name=CD630_13810;gbkey=Gene;gene_biotype=protein_coding;locus_tag=CD630_13810
gene18904	AM180355.1	2528322	2528864	-	pseudogene	ID=gene-CD630_21840	ID=gene-CD630_21840;Name=CD630_21840;gbkey=Gene;gene_biotype=pseudogene;locus_tag=CD630_21840;pseudo=true;pseudogene=unknown
gene18933	AM180355.1	3919393	3919911	-	gene	ID=gene-CD630_33550	ID=gene-CD630_33550;Name=CD630_33550;gbkey=Gene;gene_biotype=protein_coding;locus_tag=CD630_33550
gene18984	AM180355.1	1195210	1195749	+	gene	ID=gene-CD630_10230	ID=gene-CD630_10230;Name=CD630_10230;gbkey=Gene;gene_biotype=protein_coding;locus_tag=CD630_10230
gene18985	AM180355.1	1391454	1391993	+	gene	ID=gene-CD630_11900	ID=gene-CD630_11900;Name=CD630_11900;gbkey=Gene;gene_biotype=protein_coding;locus_tag=CD630_11900
gene18986	AM180355.1	1503125	1503664	+	gene	ID=gene-CD630_12960	ID=gene-CD630_12960;Name=scpB;gbkey=Gene;gene=scpB;gene_biotype=protein_coding;locus_tag=CD630_12960
gene18988	AM180355.1	2802559	2803098	-	gene	ID=gene-CD630_24270	ID=gene-CD630_24270;Name=CD630_24270;gbkey=Gene;gene_biotype=protein_coding;locus_tag=CD630_24270
gene18989	AM180355.1	3285793	3286269	+	gene	ID=gene-CD630_28150	ID=gene-CD630_28150;Name=CD630_28150;gbkey=Gene;gene_biotype=protein_coding;locus_tag=CD630_28150
gene18990	AM180355.1	3339337	3339876	-	gene	ID=gene-CD630_28560	ID=gene-CD630_28560;Name=CD630_28560;gbkey=Gene;gene_biotype=protein_coding;locus_tag=CD630_28560
gene18992	AM180355.1	3782205	3782744	-	gene	ID=gene-CD630_32310	ID=gene-CD630_32310;Name=hpt1;gbkey=Gene;gene=hpt1;gene_biotype=protein_coding;locus_tag=CD630_32310
gene18993	AM180355.1	4088392	4088931	-	gene	ID=gene-CD630_34990	ID=gene-CD630_34990;Name=spoVT;gbkey=Gene;gene=spoVT;gene_biotype=protein_coding;locus_tag=CD630_34990
gene18996	AM180355.1	1013687	1014208	+	gene	ID=gene-CD630_08370	ID=gene-CD630_08370;Name=CD630_08370;gbkey=Gene;gene_biotype=protein_coding;locus_tag=CD630_08370
gene1903	AM180355.1	2481118	2483028	-	gene	ID=gene-CD630_21450	ID=gene-CD630_21450;Name=CD630_21450;gbkey=Gene;gene_biotype=protein_coding;locus_tag=CD630_21450
gene1905	AM180355.1	1392082	1394067	+	gene	ID=gene-CD630_11910	ID=gene-CD630_11910;Name=fbp;gbkey=Gene;gene=fbp;gene_biotype=protein_coding;locus_tag=CD630_11910
gene19058	AM180355.1	660690	661226	+	gene	ID=gene-CD630_05540	ID=gene-CD630_05540;Name=sip2;gbkey=Gene;gene=sip2;gene_biotype=protein_coding;locus_tag=CD630_05540
gene19059	AM180355.1	661392	661928	+	gene	ID=gene-CD630_05550	ID=gene-CD630_05550;Name=sip2A;gbkey=Gene;gene=sip2A;gene_biotype=protein_coding;locus_tag=CD630_05550
gene19060	AM180355.1	719777	720313	+	gene	ID=gene-CD630_05950	ID=gene-CD630_05950;Name=CD630_05950;gbkey=Gene;gene_biotype=protein_coding;locus_tag=CD630_05950
gene19061	AM180355.1	1000307	1000843	+	gene	ID=gene-CD630_08250	ID=gene-CD630_08250;Name=rbr;gbkey=Gene;gene=rbr;gene_biotype=protein_coding;locus_tag=CD630_08250
gene19062	AM180355.1	1418470	1419006	+	gene	ID=gene-CD630_12200	ID=gene-CD630_12200;Name=nudF;gbkey=Gene;gene=nudF;gene_biotype=protein_coding;locus_tag=CD630_12200
gene19063	AM180355.1	1565100	1565636	+	gene	ID=gene-CD630_13480	ID=gene-CD630_13480;Name=CD630_13480;gbkey=Gene;gene_biotype=protein_coding;locus_tag=CD630_13480
gene19065	AM180355.1	3529122	3529619	-	gene	ID=gene-CD630_30370	ID=gene-CD630_30370;Name=CD630_30370;gbkey=Gene;gene_biotype=protein_coding;locus_tag=CD630_30370
gene19066	AM180355.1	3804703	3805239	+	gene	ID=gene-CD630_32500	ID=gene-CD630_32500;Name=CD630_32500;gbkey=Gene;gene_biotype=protein_coding;locus_tag=CD630_32500
gene19140	AM180355.1	723491	724024	+	gene	ID=gene-CD630_06010	ID=gene-CD630_06010;Name=ogt1;gbkey=Gene;gene=ogt1;gene_biotype=protein_coding;locus_tag=CD630_06010
gene19142	AM180355.1	3003588	3004121	-	gene	ID=gene-CD630_25950	ID=gene-CD630_25950;Name=pyrR;gbkey=Gene;gene=pyrR;gene_biotype=protein_coding;locus_tag=CD630_25950
gene19143	AM180355.1	3350386	3350919	-	gene	ID=gene-CD630_28650	ID=gene-CD630_28650;Name=CD630_28650;gbkey=Gene;gene_biotype=protein_coding;locus_tag=CD630_28650
gene19144	AM180355.1	4083573	4084106	-	gene	ID=gene-CD630_34930	ID=gene-CD630_34930;Name=CD630_34930;gbkey=Gene;gene_biotype=protein_coding;locus_tag=CD630_34930
gene1920	AM180355.1	3064681	3066660	-	gene	ID=gene-CD630_26560	ID=gene-CD630_26560;Name=spoVD;gbkey=Gene;gene=spoVD;gene_biotype=protein_coding;locus_tag=CD630_26560
gene19221	AM180355.1	228265	228804	+	gene	ID=gene-CD630_01720	ID=gene-CD630_01720;Name=CD630_01720;gbkey=Gene;gene_biotype=protein_coding;locus_tag=CD630_01720
gene19222	AM180355.1	1545171	1545701	-	gene	ID=gene-CD630_13310	ID=gene-CD630_13310;Name=sip3;gbkey=Gene;gene=sip3;gene_biotype=protein_coding;locus_tag=CD630_13310
gene19225	AM180355.1	4117890	4118420	-	gene	ID=gene-CD630_35240	ID=gene-CD630_35240;Name=CD630_35240;gbkey=Gene;gene_biotype=protein_coding;locus_tag=CD630_35240
gene19227	AM180355.1	1446815	1447339	+	gene	ID=gene-CD630_12450	ID=gene-CD630_12450;Name=CD630_12450;gbkey=Gene;gene_biotype=protein_coding;locus_tag=CD630_12450
gene19297	AM180355.1	3028140	3028667	-	gene	ID=gene-CD630_26190	ID=gene-CD630_26190;Name=CD630_26190;gbkey=Gene;gene_biotype=protein_coding;locus_tag=CD630_26190
gene19298	AM180355.1	3109982	3110509	-	gene	ID=gene-CD630_26910	ID=gene-CD630_26910;Name=hpt;gbkey=Gene;gene=hpt;gene_biotype=protein_coding;locus_tag=CD630_26910
gene19299	AM180355.1	3867214	3867741	+	gene	ID=gene-CD630_33030	ID=gene-CD630_33030;Name=chrA';gbkey=Gene;gene=chrA';gene_biotype=protein_coding;locus_tag=CD630_33030
gene19300	AM180355.1	4098310	4098837	-	gene	ID=gene-CD630_35070	ID=gene-CD630_35070;Name=CD630_35070;gbkey=Gene;gene_biotype=protein_coding;locus_tag=CD630_35070
gene1931	AM180355.1	2788098	2790071	-	gene	ID=gene-CD630_24160	ID=gene-CD630_24160;Name=CD630_24160;gbkey=Gene;gene_biotype=protein_coding;locus_tag=CD630_24160
gene1937	AM180355.1	3996190	3998160	-	gene	ID=gene-CD630_34120	ID=gene-CD630_34120;Name=uvrB;gbkey=Gene;gene=uvrB;gene_biotype=protein_coding;locus_tag=CD630_34120
gene19373	AM180355.1	1376750	1377274	+	gene	ID=gene-CD630_11760	ID=gene-CD630_11760;Name=CD630_11760;gbkey=Gene;gene_biotype=protein_coding;locus_tag=CD630_11760
gene19374	AM180355.1	2460813	2461337	-	gene	ID=gene-CD630_21250	ID=gene-CD630_21250;Name=CD630_21250;gbkey=Gene;gene_biotype=protein_coding;locus_tag=CD630_21250
gene19375	AM180355.1	2923881	2924405	-	gene	ID=gene-CD630_25310	ID=gene-CD630_25310;Name=CD630_25310;gbkey=Gene;gene_biotype=protein_coding;locus_tag=CD630_25310
gene19376	AM180355.1	2958036	2958560	-	gene	ID=gene-CD630_25570	ID=gene-CD630_25570;Name=CD630_25570;gbkey=Gene;gene_biotype=protein_coding;locus_tag=CD630_25570
gene1938	AM180355.1	4159743	4161737	-	gene	ID=gene-CD630_35590	ID=gene-CD630_35590;Name=ftsH2;gbkey=Gene;gene=ftsH2;gene_biotype=protein_coding;locus_tag=CD630_35590
gene19384	AM180355.1	814883	815353	+	gene	ID=gene-CD630_06710	ID=gene-CD630_06710;Name=CD630_06710;gbkey=Gene;gene_biotype=protein_coding;locus_tag=CD630_06710
gene19433	AM180355.1	639255	639872	+	gene	ID=gene-CD630_05340	ID=gene-CD630_05340;Name=cheC;gbkey=Gene;gene=cheC;gene_biotype=protein_coding;locus_tag=CD630_05340
gene19434	AM180355.1	755054	755575	+	gene	ID=gene-CD630_06310	ID=gene-CD630_06310;Name=CD630_06310;gbkey=Gene;gene_biotype=protein_coding;locus_tag=CD630_06310
gene19435	AM180355.1	1395249	1395770	+	gene	ID=gene-CD630_11930	ID=gene-CD630_11930;Name=spoIIIAB;gbkey=Gene;gene=spoIIIAB;gene_biotype=protein_coding;locus_tag=CD630_11930
gene19436	AM180355.1	1410244	1410723	-	gene	ID=gene-CD630_12110	ID=gene-CD630_12110;Name=CD630_12110;gbkey=Gene;gene_biotype=protein_coding;locus_tag=CD630_12110
gene19441	AM180355.1	4136701	4137222	-	gene	ID=gene-CD630_35410	ID=gene-CD630_35410;Name=spmB;gbkey=Gene;gene=spmB;gene_biotype=protein_coding;locus_tag=CD630_35410
gene1946	AM180355.1	2277317	2279284	-	gene	ID=gene-CD630_19760	ID=gene-CD630_19760;Name=mutL;gbkey=Gene;gene=mutL;gene_biotype=protein_coding;locus_tag=CD630_19760
gene19587	AM180355.1	1458171	1458686	+	gene	ID=gene-CD630_12550	ID=gene-CD630_12550;Name=rimM;gbkey=Gene;gene=rimM;gene_biotype=protein_coding;locus_tag=CD630_12550
gene19590	AM180355.1	2542337	2542852	+	gene	ID=gene-CD630_21950	ID=gene-CD630_21950;Name=ftnA;gbkey=Gene;gene=ftnA;gene_biotype=protein_coding;locus_tag=CD630_21950
gene19591	AM180355.1	3755775	3756290	+	gene	ID=gene-CD630_32090	ID=gene-CD630_32090;Name=CD630_32090;gbkey=Gene;gene_biotype=protein_coding;locus_tag=CD630_32090
gene19592	AM180355.1	3878495	3879010	-	gene	ID=gene-CD630_33130	ID=gene-CD630_33130;Name=hydN1;gbkey=Gene;gene=hydN1;gene_biotype=protein_coding;locus_tag=CD630_33130
gene19653	AM180355.1	280761	281273	-	gene	ID=gene-CD630_02170	ID=gene-CD630_02170;Name=CD630_02170;gbkey=Gene;gene_biotype=protein_coding;locus_tag=CD630_02170
gene19655	AM180355.1	901618	902130	+	gene	ID=gene-CD630_07390	ID=gene-CD630_07390;Name=CD630_07390;gbkey=Gene;gene_biotype=protein_coding;locus_tag=CD630_07390
gene19656	AM180355.1	2455377	2455889	-	gene	ID=gene-CD630_21210	ID=gene-CD630_21210;Name=CD630_21210;gbkey=Gene;gene_biotype=protein_coding;locus_tag=CD630_21210
gene19657	AM180355.1	3185848	3186360	-	gene	ID=gene-CD630_27450	ID=gene-CD630_27450;Name=apt;gbkey=Gene;gene=apt;gene_biotype=protein_coding;locus_tag=CD630_27450
gene19658	AM180355.1	3866714	3867226	+	gene	ID=gene-CD630_33020	ID=gene-CD630_33020;Name=chrA;gbkey=Gene;gene=chrA;gene_biotype=protein_coding;locus_tag=CD630_33020
gene19659	AM180355.1	4244866	4245378	-	gene	ID=gene-CD630_36360	ID=gene-CD630_36360;Name=CD630_36360;gbkey=Gene;gene_biotype=protein_coding;locus_tag=CD630_36360
gene19695	AM180355.1	1832895	1833377	+	gene	ID=gene-CD630_15810	ID=gene-CD630_15810;Name=CD630_15810;gbkey=Gene;gene_biotype=protein_coding;locus_tag=CD630_15810
gene19698	AM180355.1	1400189	1400698	+	gene	ID=gene-CD630_12010	ID=gene-CD630_12010;Name=nusB;gbkey=Gene;gene=nusB;gene_biotype=protein_coding;locus_tag=CD630_12010
gene1972	AM180355.1	3138516	3140450	-	gene	ID=gene-CD630_27130	ID=gene-CD630_27130;Name=cwp22;gbkey=Gene;gene=cwp22;gene_biotype=protein_coding;locus_tag=CD630_27130
gene19724	AM180355.1	173449	173976	-	gene	ID=gene-CD630_01290	ID=gene-CD630_01290;Name=CD630_01290;gbkey=Gene;gene_biotype=protein_coding;locus_tag=CD630_01290
gene19727	AM180355.1	3277337	3277846	-	gene	ID=gene-CD630_28070	ID=gene-CD630_28070;Name=ruvC;gbkey=Gene;gene=ruvC;gene_biotype=protein_coding;locus_tag=CD630_28070
gene19728	AM180355.1	3830925	3831434	-	gene	ID=gene-CD630_32720	ID=gene-CD630_32720;Name=CD630_32720;gbkey=Gene;gene_biotype=protein_coding;locus_tag=CD630_32720
gene19794	AM180355.1	1157903	1158418	+	gene	ID=gene-CD630_09930	ID=gene-CD630_09930;Name=CD630_09930;gbkey=Gene;gene_biotype=protein_coding;locus_tag=CD630_09930
gene19795	AM180355.1	1574593	1575099	-	gene	ID=gene-CD630_13590	ID=gene-CD630_13590;Name=CD630_13590;gbkey=Gene;gene_biotype=protein_coding;locus_tag=CD630_13590
gene19796	AM180355.1	1681371	1681877	+	gene	ID=gene-CD630_14520	ID=gene-CD630_14520;Name=folK;gbkey=Gene;gene=folK;gene_biotype=protein_coding;locus_tag=CD630_14520
gene19797	AM180355.1	2743133	2743639	-	gene	ID=gene-CD630_23770	ID=gene-CD630_23770;Name=CD630_23770;gbkey=Gene;gene_biotype=protein_coding;locus_tag=CD630_23770
gene19798	AM180355.1	2763689	2764195	-	gene	ID=gene-CD630_23940	ID=gene-CD630_23940;Name=dnaQ;gbkey=Gene;gene=dnaQ;gene_biotype=protein_coding;locus_tag=CD630_23940
gene19799	AM180355.1	2765435	2765941	-	gene	ID=gene-CD630_23960	ID=gene-CD630_23960;Name=CD630_23960;gbkey=Gene;gene_biotype=protein_coding;locus_tag=CD630_23960
gene19801	AM180355.1	4164771	4165277	-	gene	ID=gene-CD630_35630	ID=gene-CD630_35630;Name=CD630_35630;gbkey=Gene;gene_biotype=protein_coding;locus_tag=CD630_35630
gene1988	AM180355.1	773616	775571	+	gene	ID=gene-CD630_06500	ID=gene-CD630_06500;Name=CD630_06500;gbkey=Gene;gene_biotype=protein_coding;locus_tag=CD630_06500
gene19896	AM180355.1	2593329	2593820	-	gene	ID=gene-CD630_22420	ID=gene-CD630_22420;Name=CD630_22420;gbkey=Gene;gene_biotype=protein_coding;locus_tag=CD630_22420
gene19897	AM180355.1	1986855	1987358	+	gene	ID=gene-CD630_17120	ID=gene-CD630_17120;Name=moaB;gbkey=Gene;gene=moaB;gene_biotype=protein_coding;locus_tag=CD630_17120
gene19898	AM180355.1	2500593	2501096	-	gene	ID=gene-CD630_21620	ID=gene-CD630_21620;Name=CD630_21620;gbkey=Gene;gene_biotype=protein_coding;locus_tag=CD630_21620
gene19899	AM180355.1	3756339	3756842	+	gene	ID=gene-CD630_32100	ID=gene-CD630_32100;Name=CD630_32100;gbkey=Gene;gene_biotype=protein_coding;locus_tag=CD630_32100
gene19962	AM180355.1	2198071	2198562	-	gene	ID=gene-CD630_18930	ID=gene-CD630_18930;Name=CD630_18930;gbkey=Gene;gene_biotype=protein_coding;locus_tag=CD630_18930
gene19968	AM180355.1	2958564	2959061	-	gene	ID=gene-CD630_25580	ID=gene-CD630_25580;Name=coaD;gbkey=Gene;gene=coaD;gene_biotype=protein_coding;locus_tag=CD630_25580
gene19969	AM180355.1	820169	820648	-	gene	ID=gene-CD630_06770	ID=gene-CD630_06770;Name=csfT;gbkey=Gene;gene=csfT;gene_biotype=protein_coding;locus_tag=CD630_06770
gene20007	AM180355.1	818784	819185	+	gene	ID=gene-CD630_06750	ID=gene-CD630_06750;Name=CD630_06750;gbkey=Gene;gene_biotype=protein_coding;locus_tag=CD630_06750
gene20008	AM180355.1	2422737	2423237	-	gene	ID=gene-CD630_20970	ID=gene-CD630_20970;Name=CD630_20970;gbkey=Gene;gene_biotype=protein_coding;locus_tag=CD630_20970
gene20080	AM180355.1	347142	347639	+	gene	ID=gene-CD630_02850	ID=gene-CD630_02850;Name=CD630_02850;gbkey=Gene;gene_biotype=protein_coding;locus_tag=CD630_02850
gene20081	AM180355.1	637587	638084	+	gene	ID=gene-CD630_05320	ID=gene-CD630_05320;Name=CD630_05320;gbkey=Gene;gene_biotype=protein_coding;locus_tag=CD630_05320
gene20083	AM180355.1	2557851	2558348	-	gene	ID=gene-CD630_22080	ID=gene-CD630_22080;Name=CD630_22080;gbkey=Gene;gene_biotype=protein_coding;locus_tag=CD630_22080
gene20084	AM180355.1	2820567	2821064	-	gene	ID=gene-CD630_24450	ID=gene-CD630_24450;Name=CD630_24450;gbkey=Gene;gene_biotype=protein_coding;locus_tag=CD630_24450
gene20085	AM180355.1	3190798	3191295	-	gene	ID=gene-CD630_27480	ID=gene-CD630_27480;Name=CD630_27480;gbkey=Gene;gene_biotype=protein_coding;locus_tag=CD630_27480
gene20086	AM180355.1	3699896	3700393	+	gene	ID=gene-CD630_31670	ID=gene-CD630_31670;Name=CD630_31670;gbkey=Gene;gene_biotype=protein_coding;locus_tag=CD630_31670
gene20088	AM180355.1	3983987	3984484	+	gene	ID=gene-CD630_34050	ID=gene-CD630_34050;Name=CD630_34050;gbkey=Gene;gene_biotype=protein_coding;locus_tag=CD630_34050
gene20089	AM180355.1	4063281	4063778	-	gene	ID=gene-CD630_34720	ID=gene-CD630_34720;Name=atpB1;gbkey=Gene;gene=atpB1;gene_biotype=protein_coding;locus_tag=CD630_34720
gene20090	AM180355.1	4172003	4172500	-	gene	ID=gene-CD630_35710	ID=gene-CD630_35710;Name=CD630_35710;gbkey=Gene;gene_biotype=protein_coding;locus_tag=CD630_35710
gene20098	AM180355.1	369853	370353	+	gene	ID=gene-CD630_03080	ID=gene-CD630_03080;Name=CD630_03080;gbkey=Gene;gene_biotype=protein_coding;locus_tag=CD630_03080
gene20146	AM180355.1	831229	831738	+	gene	ID=gene-CD630_06850	ID=gene-CD630_06850;Name=infC;gbkey=Gene;gene=infC;gene_biotype=protein_coding;locus_tag=CD630_06850
gene20198	AM180355.1	618509	619003	+	gene	ID=gene-CD630_05180	ID=gene-CD630_05180;Name=CD630_05180;gbkey=Gene;gene_biotype=protein_coding;locus_tag=CD630_05180
gene20199	AM180355.1	1013096	1013590	+	gene	ID=gene-CD630_08360	ID=gene-CD630_08360;Name=CD630_08360;gbkey=Gene;gene_biotype=protein_coding;locus_tag=CD630_08360
gene20200	AM180355.1	2051781	2052275	+	gene	ID=gene-CD630_17700	ID=gene-CD630_17700;Name=ogt2;gbkey=Gene;gene=ogt2;gene_biotype=protein_coding;locus_tag=CD630_17700
gene20205	AM180355.1	209440	209907	+	gene	ID=gene-CD630_01590	ID=gene-CD630_01590;Name=CD630_01590;gbkey=Gene;gene_biotype=protein_coding;locus_tag=CD630_01590
gene2026	AM180355.1	2418959	2420893	-	gene	ID=gene-CD630_20940	ID=gene-CD630_20940;Name=CD630_20940;gbkey=Gene;gene_biotype=protein_coding;locus_tag=CD630_20940
gene2027	AM180355.1	3831876	3833822	+	gene	ID=gene-CD630_32740	ID=gene-CD630_32740;Name=feoB2;gbkey=Gene;gene=feoB2;gene_biotype=protein_coding;locus_tag=CD630_32740
gene20290	AM180355.1	425731	426222	+	gene	ID=gene-CD630_03510	ID=gene-CD630_03510;Name=CD630_03510;gbkey=Gene;gene_biotype=protein_coding;locus_tag=CD630_03510
gene20291	AM180355.1	1155972	1156463	+	gene	ID=gene-CD630_09910	ID=gene-CD630_09910;Name=leuD;gbkey=Gene;gene=leuD;gene_biotype=protein_coding;locus_tag=CD630_09910
gene20292	AM180355.1	2725189	2725560	-	gene	ID=gene-CD630_23570	ID=gene-CD630_23570;Name=grdX;gbkey=Gene;gene=grdX;gene_biotype=protein_coding;locus_tag=CD630_23570
gene20293	AM180355.1	3436276	3436767	-	gene	ID=gene-CD630_29590	ID=gene-CD630_29590;Name=atpK;gbkey=Gene;gene=atpK;gene_biotype=protein_coding;locus_tag=CD630_29590
gene20294	AM180355.1	3611561	3612052	-	gene	ID=gene-CD630_31030	ID=gene-CD630_31030;Name=CD630_31030;gbkey=Gene;gene_biotype=protein_coding;locus_tag=CD630_31030
gene20296	AM180355.1	3694827	3695318	-	gene	ID=gene-CD630_31630	ID=gene-CD630_31630;Name=CD630_31630;gbkey=Gene;gene_biotype=protein_coding;locus_tag=CD630_31630
gene20330	AM180355.1	3273776	3274261	-	gene	ID=gene-CD630_28030	ID=gene-CD630_28030;Name=CD630_28030;gbkey=Gene;gene_biotype=protein_coding;locus_tag=CD630_28030
gene20385	AM180355.1	348061	348549	+	gene	ID=gene-CD630_02870	ID=gene-CD630_02870;Name=CD630_02870;gbkey=Gene;gene_biotype=protein_coding;locus_tag=CD630_02870
gene20387	AM180355.1	982712	983200	+	gene	ID=gene-CD630_08100	ID=gene-CD630_08100;Name=CD630_08100;gbkey=Gene;gene_biotype=protein_coding;locus_tag=CD630_08100
gene20388	AM180355.1	1345102	1345590	+	gene	ID=gene-CD630_11470	ID=gene-CD630_11470;Name=CD630_11470;gbkey=Gene;gene_biotype=protein_coding;locus_tag=CD630_11470
gene20389	AM180355.1	3552355	3552843	-	gene	ID=gene-CD630_30590	ID=gene-CD630_30590;Name=CD630_30590;gbkey=Gene;gene_biotype=protein_coding;locus_tag=CD630_30590
gene20427	AM180355.1	2760713	2761195	-	gene	ID=gene-CD630_23910	ID=gene-CD630_23910;Name=CD630_23910;gbkey=Gene;gene_biotype=protein_coding;locus_tag=CD630_23910
gene20466	AM180355.1	232566	233039	+	gene	ID=gene-CD630_01750	ID=gene-CD630_01750;Name=CD630_01750;gbkey=Gene;gene_biotype=protein_coding;locus_tag=CD630_01750
gene20468	AM180355.1	639869	640354	+	gene	ID=gene-CD630_05350	ID=gene-CD630_05350;Name=cheD;gbkey=Gene;gene=cheD;gene_biotype=protein_coding;locus_tag=CD630_05350
gene20469	AM180355.1	2295867	2296352	-	gene	ID=gene-CD630_19900	ID=gene-CD630_19900;Name=CD630_19900;gbkey=Gene;gene_biotype=protein_coding;locus_tag=CD630_19900
gene2047	AM180355.1	1518523	1520463	+	gene	ID=gene-CD630_13090	ID=gene-CD630_13090;Name=infB;gbkey=Gene;gene=infB;gene_biotype=protein_coding;locus_tag=CD630_13090
gene20471	AM180355.1	2774161	2774646	-	gene	ID=gene-CD630_24050	ID=gene-CD630_24050;Name=CD630_24050;gbkey=Gene;gene_biotype=protein_coding;locus_tag=CD630_24050
gene20473	AM180355.1	3731127	3731612	+	gene	ID=gene-CD630_31880	ID=gene-CD630_31880;Name=CD630_31880;gbkey=Gene;gene_biotype=protein_coding;locus_tag=CD630_31880
gene20478	AM180355.1	1954557	1955036	-	gene	ID=gene-CD630_16790	ID=gene-CD630_16790;Name=CD630_16790;gbkey=Gene;gene_biotype=protein_coding;locus_tag=CD630_16790
gene20516	AM180355.1	350241	350720	+	gene	ID=gene-CD630_02900	ID=gene-CD630_02900;Name=CD630_02900;gbkey=Gene;gene_biotype=protein_coding;locus_tag=CD630_02900
gene2052	AM180355.1	1166882	1168816	+	gene	ID=gene-CD630_09980	ID=gene-CD630_09980;Name=CD630_09980;gbkey=Gene;gene_biotype=protein_coding;locus_tag=CD630_09980
gene20567	AM180355.1	1806610	1807092	+	gene	ID=gene-CD630_15580	ID=gene-CD630_15580;Name=csfV;gbkey=Gene;gene=csfV;gene_biotype=protein_coding;gene_synonym=sigV;locus_tag=CD630_15580
gene20570	AM180355.1	3563541	3564023	-	gene	ID=gene-CD630_30680	ID=gene-CD630_30680;Name=xynB;gbkey=Gene;gene=xynB;gene_biotype=protein_coding;locus_tag=CD630_30680
gene20571	AM180355.1	3916337	3916819	-	gene	ID=gene-CD630_33520	ID=gene-CD630_33520;Name=CD630_33520;gbkey=Gene;gene_biotype=protein_coding;locus_tag=CD630_33520
gene2058	AM180355.1	333418	335355	+	gene	ID=gene-CD630_02730	ID=gene-CD630_02730;Name=htpG;gbkey=Gene;gene=htpG;gene_biotype=protein_coding;locus_tag=CD630_02730
gene20595	AM180355.1	2052391	2052768	+	gene	ID=gene-CD630_17710	ID=gene-CD630_17710;Name=CD630_17710;gbkey=Gene;gene_biotype=protein_coding;locus_tag=CD630_17710
gene2060	AM180355.1	4134368	4136305	-	gene	ID=gene-CD630_35400	ID=gene-CD630_35400;Name=metG;gbkey=Gene;gene=metG;gene_biotype=protein_coding;locus_tag=CD630_35400
gene20653	AM180355.1	3837166	3837645	-	gene	ID=gene-CD630_32790	ID=gene-CD630_32790;Name=CD630_32790;gbkey=Gene;gene_biotype=protein_coding;locus_tag=CD630_32790
gene20654	AM180355.1	4154234	4154713	-	gene	ID=gene-CD630_35530	ID=gene-CD630_35530;Name=greA;gbkey=Gene;gene=greA;gene_biotype=protein_coding;locus_tag=CD630_35530
gene20655	AM180355.1	4257925	4258404	-	gene	ID=gene-CD630_36490	ID=gene-CD630_36490;Name=rlmH;gbkey=Gene;gene=rlmH;gene_biotype=protein_coding;locus_tag=CD630_36490
gene20661	AM180355.1	373980	374345	+	gene	ID=gene-CD630_03120	ID=gene-CD630_03120;Name=CD630_03120;gbkey=Gene;gene_biotype=protein_coding;locus_tag=CD630_03120
gene20705	AM180355.1	562228	562614	-	gene	ID=gene-CD630_04710	ID=gene-CD630_04710;Name=blaI;gbkey=Gene;gene=blaI;gene_biotype=protein_coding;locus_tag=CD630_04710
gene20724	AM180355.1	200245	200721	+	gene	ID=gene-CD630_01510	ID=gene-CD630_01510;Name=rimI;gbkey=Gene;gene=rimI;gene_biotype=protein_coding;locus_tag=CD630_01510
gene20725	AM180355.1	281723	282199	+	gene	ID=gene-CD630_02180	ID=gene-CD630_02180;Name=purE;gbkey=Gene;gene=purE;gene_biotype=protein_coding;locus_tag=CD630_02180
gene20726	AM180355.1	858656	859132	+	gene	ID=gene-CD630_07050	ID=gene-CD630_07050;Name=CD630_07050;gbkey=Gene;gene_biotype=protein_coding;locus_tag=CD630_07050
gene20728	AM180355.1	1617309	1617785	-	gene	ID=gene-CD630_13970	ID=gene-CD630_13970;Name=CD630_13970;gbkey=Gene;gene_biotype=protein_coding;locus_tag=CD630_13970
gene20729	AM180355.1	1689385	1689861	-	gene	ID=gene-CD630_14600	ID=gene-CD630_14600;Name=CD630_14600;gbkey=Gene;gene_biotype=protein_coding;locus_tag=CD630_14600
gene20730	AM180355.1	1734230	1734706	+	gene	ID=gene-CD630_14970	ID=gene-CD630_14970;Name=CD630_14970;gbkey=Gene;gene_biotype=protein_coding;locus_tag=CD630_14970
gene20752	AM180355.1	1245744	1246211	+	gene	ID=gene-CD630_10530	ID=gene-CD630_10530;Name=CD630_10530;gbkey=Gene;gene_biotype=protein_coding;locus_tag=CD630_10530
gene20829	AM180355.1	582091	582564	+	gene	ID=gene-CD630_04920	ID=gene-CD630_04920;Name=CD630_04920;gbkey=Gene;gene_biotype=protein_coding;locus_tag=CD630_04920
gene20830	AM180355.1	1171483	1171956	+	gene	ID=gene-CD630_10020	ID=gene-CD630_10020;Name=CD630_10020;gbkey=Gene;gene_biotype=protein_coding;locus_tag=CD630_10020
gene20831	AM180355.1	2224085	2224558	+	gene	ID=gene-CD630_19250	ID=gene-CD630_19250;Name=eutQ;gbkey=Gene;gene=eutQ;gene_biotype=protein_coding;locus_tag=CD630_19250
gene20832	AM180355.1	3165097	3165570	+	gene	ID=gene-CD630_27280	ID=gene-CD630_27280;Name=CD630_27280;gbkey=Gene;gene_biotype=protein_coding;locus_tag=CD630_27280
gene20855	AM180355.1	2968663	2969115	+	gene	ID=gene-CD630_25660	ID=gene-CD630_25660;Name=CD630_25660;gbkey=Gene;gene_biotype=protein_coding;locus_tag=CD630_25660
gene2086	AM180355.1	1625371	1627299	+	gene	ID=gene-CD630_14040	ID=gene-CD630_14040;Name=CD630_14040;gbkey=Gene;gene_biotype=protein_coding;locus_tag=CD630_14040
gene2091	AM180355.1	892782	894710	+	gene	ID=gene-CD630_07300	ID=gene-CD630_07300;Name=CD630_07300;gbkey=Gene;gene_biotype=protein_coding;locus_tag=CD630_07300
gene2092	AM180355.1	983376	985304	+	gene	ID=gene-CD630_08110	ID=gene-CD630_08110;Name=CD630_08110;gbkey=Gene;gene_biotype=protein_coding;locus_tag=CD630_08110
gene20921	AM180355.1	634252	634722	-	gene	ID=gene-CD630_05290	ID=gene-CD630_05290;Name=CD630_05290;gbkey=Gene;gene_biotype=protein_coding;locus_tag=CD630_05290
gene20922	AM180355.1	675554	676024	+	gene	ID=gene-CD630_05660	ID=gene-CD630_05660;Name=CD630_05660;gbkey=Gene;gene_biotype=protein_coding;locus_tag=CD630_05660
gene20923	AM180355.1	1269131	1269601	+	gene	ID=gene-CD630_10760	ID=gene-CD630_10760;Name=CD630_10760;gbkey=Gene;gene_biotype=protein_coding;locus_tag=CD630_10760
gene20924	AM180355.1	1988368	1988838	+	gene	ID=gene-CD630_17140	ID=gene-CD630_17140;Name=moaC;gbkey=Gene;gene=moaC;gene_biotype=protein_coding;locus_tag=CD630_17140
gene20925	AM180355.1	2410996	2411466	-	gene	ID=gene-CD630_20880	ID=gene-CD630_20880;Name=xdhC2;gbkey=Gene;gene=xdhC2;gene_biotype=protein_coding;locus_tag=CD630_20880
gene20927	AM180355.1	3871295	3871765	-	gene	ID=gene-CD630_33070	ID=gene-CD630_33070;Name=CD630_33070;gbkey=Gene;gene_biotype=protein_coding;locus_tag=CD630_33070
gene2093	AM180355.1	2966501	2968429	-	gene	ID=gene-CD630_25650	ID=gene-CD630_25650;Name=CD630_25650;gbkey=Gene;gene_biotype=protein_coding;locus_tag=CD630_25650
gene2094	AM180355.1	3638538	3640466	-	gene	ID=gene-CD630_31250	ID=gene-CD630_31250;Name=bglF4;gbkey=Gene;gene=bglF4;gene_biotype=protein_coding;locus_tag=CD630_31250
gene20954	AM180355.1	254974	256157	+	pseudogene	ID=gene-CD630_01960	ID=gene-CD630_01960;Name=CD630_01960;gbkey=Gene;gene_biotype=pseudogene;locus_tag=CD630_01960;pseudo=true;pseudogene=unknown
gene20986	AM180355.1	2733352	2733810	-	gene	ID=gene-CD630_23660	ID=gene-CD630_23660;Name=CD630_23660;gbkey=Gene;gene_biotype=protein_coding;locus_tag=CD630_23660
gene20990	AM180355.1	1594601	1595020	-	gene	ID=gene-CD630_13780	ID=gene-CD630_13780;Name=CD630_13780;gbkey=Gene;gene_biotype=protein_coding;locus_tag=CD630_13780
gene21007	AM180355.1	2035082	2035543	+	gene	ID=gene-CD630_17570	ID=gene-CD630_17570;Name=CD630_17570;gbkey=Gene;gene_biotype=protein_coding;locus_tag=CD630_17570
gene21016	AM180355.1	1688532	1688999	-	gene	ID=gene-CD630_14590	ID=gene-CD630_14590;Name=CD630_14590;gbkey=Gene;gene_biotype=protein_coding;locus_tag=CD630_14590
gene21019	AM180355.1	3551874	3552350	-	gene	ID=gene-CD630_30580	ID=gene-CD630_30580;Name=CD630_30580;gbkey=Gene;gene_biotype=protein_coding;locus_tag=CD630_30580
gene21020	AM180355.1	3791375	3791842	-	gene	ID=gene-CD630_32390	ID=gene-CD630_32390;Name=prdE;gbkey=Gene;gene=prdE;gene_biotype=protein_coding;locus_tag=CD630_32390
gene21053	AM180355.1	2106636	2107100	+	gene	ID=gene-CD630_18220	ID=gene-CD630_18220;Name=bcp;gbkey=Gene;gene=bcp;gene_biotype=protein_coding;locus_tag=CD630_18220
gene21061	AM180355.1	270469	270921	+	gene	ID=gene-CD630_02060	ID=gene-CD630_02060;Name=CD630_02060;gbkey=Gene;gene_biotype=protein_coding;locus_tag=CD630_02060
gene21067	AM180355.1	2989478	2989918	-	gene	ID=gene-CD630_25850	ID=gene-CD630_25850;Name=def2;gbkey=Gene;gene=def2;gene_biotype=protein_coding;locus_tag=CD630_25850
gene21077	AM180355.1	3687896	3688387	-	gene	ID=gene-CD630_31570	ID=gene-CD630_31570;Name=smpB;gbkey=Gene;gene=smpB;gene_biotype=protein_coding;locus_tag=CD630_31570
gene21103	AM180355.1	948832	949251	+	gene	ID=gene-CD630_07780	ID=gene-CD630_07780;Name=CD630_07780;gbkey=Gene;gene_biotype=protein_coding;locus_tag=CD630_07780
gene21105	AM180355.1	3368314	3368778	+	gene	ID=gene-CD630_28790	ID=gene-CD630_28790;Name=CD630_28790;gbkey=Gene;gene_biotype=protein_coding;locus_tag=CD630_28790
gene2114	AM180355.1	1009321	1011246	+	gene	ID=gene-CD630_08330	ID=gene-CD630_08330;Name=acnB;gbkey=Gene;gene=acnB;gene_biotype=protein_coding;locus_tag=CD630_08330
gene2115	AM180355.1	3436770	3438695	-	gene	ID=gene-CD630_29600	ID=gene-CD630_29600;Name=atpI;gbkey=Gene;gene=atpI;gene_biotype=protein_coding;locus_tag=CD630_29600
gene21175	AM180355.1	1516267	1516728	+	gene	ID=gene-CD630_13060	ID=gene-CD630_13060;Name=rimP;gbkey=Gene;gene=rimP;gene_biotype=protein_coding;locus_tag=CD630_13060
gene21176	AM180355.1	1969506	1969967	-	gene	ID=gene-CD630_16970	ID=gene-CD630_16970;Name=ribH;gbkey=Gene;gene=ribH;gene_biotype=protein_coding;locus_tag=CD630_16970
gene21179	AM180355.1	2564716	2565177	-	gene	ID=gene-CD630_22120	ID=gene-CD630_22120;Name=CD630_22120;gbkey=Gene;gene_biotype=protein_coding;locus_tag=CD630_22120
gene21180	AM180355.1	2816434	2816895	-	gene	ID=gene-CD630_24400	ID=gene-CD630_24400;Name=CD630_24400;gbkey=Gene;gene_biotype=protein_coding;locus_tag=CD630_24400
gene21181	AM180355.1	3048942	3049403	-	gene	ID=gene-CD630_26400	ID=gene-CD630_26400;Name=nrdR;gbkey=Gene;gene=nrdR;gene_biotype=protein_coding;locus_tag=CD630_26400
gene21182	AM180355.1	3105805	3106272	-	gene	ID=gene-CD630_26860	ID=gene-CD630_26860;Name=CD630_26860;gbkey=Gene;gene_biotype=protein_coding;locus_tag=CD630_26860
gene21183	AM180355.1	3106455	3106916	+	gene	ID=gene-CD630_26870	ID=gene-CD630_26870;Name=CD630_26870;gbkey=Gene;gene_biotype=protein_coding;locus_tag=CD630_26870
gene21184	AM180355.1	3502731	3503192	-	gene	ID=gene-CD630_30150	ID=gene-CD630_30150;Name=CD630_30150;gbkey=Gene;gene_biotype=protein_coding;locus_tag=CD630_30150
gene21185	AM180355.1	3754968	3755429	-	gene	ID=gene-CD630_32080	ID=gene-CD630_32080;Name=CD630_32080;gbkey=Gene;gene_biotype=protein_coding;locus_tag=CD630_32080
gene21186	AM180355.1	4057326	4057787	-	gene	ID=gene-CD630_34650	ID=gene-CD630_34650;Name=CD630_34650;gbkey=Gene;gene_biotype=protein_coding;locus_tag=CD630_34650
gene21213	AM180355.1	3029773	3030231	-	gene	ID=gene-CD630_26220	ID=gene-CD630_26220;Name=sepF;gbkey=Gene;gene=sepF;gene_biotype=protein_coding;locus_tag=CD630_26220
gene2123	AM180355.1	683462	685381	+	gene	ID=gene-CD630_05740	ID=gene-CD630_05740;Name=thrS;gbkey=Gene;gene=thrS;gene_biotype=protein_coding;locus_tag=CD630_05740
gene2125	AM180355.1	3571165	3573081	-	gene	ID=gene-CD630_30750	ID=gene-CD630_30750;Name=tagABC;gbkey=Gene;gene=tagABC;gene_biotype=protein_coding;locus_tag=CD630_30750
gene21257	AM180355.1	742379	742816	-	gene	ID=gene-CD630_06180	ID=gene-CD630_06180;Name=CD630_06180;gbkey=Gene;gene_biotype=protein_coding;locus_tag=CD630_06180
gene2126	AM180355.1	876288	878207	+	gene	ID=gene-CD630_07160	ID=gene-CD630_07160;Name=cooS1;gbkey=Gene;gene=cooS1;gene_biotype=protein_coding;locus_tag=CD630_07160
gene21264	AM180355.1	1495161	1495619	+	gene	ID=gene-CD630_12870	ID=gene-CD630_12870;Name=fur;gbkey=Gene;gene=fur;gene_biotype=protein_coding;locus_tag=CD630_12870
gene21265	AM180355.1	1859253	1859711	-	gene	ID=gene-CD630_16050	ID=gene-CD630_16050;Name=CD630_16050;gbkey=Gene;gene_biotype=protein_coding;locus_tag=CD630_16050
gene21266	AM180355.1	2200638	2201096	-	gene	ID=gene-CD630_18970	ID=gene-CD630_18970;Name=CD630_18970;gbkey=Gene;gene_biotype=protein_coding;locus_tag=CD630_18970
gene21267	AM180355.1	2689092	2689550	-	gene	ID=gene-CD630_23270	ID=gene-CD630_23270;Name=CD630_23270;gbkey=Gene;gene_biotype=protein_coding;locus_tag=CD630_23270
gene2128	AM180355.1	3133147	3135069	-	gene	ID=gene-CD630_27090	ID=gene-CD630_27090;Name=CD630_27090;gbkey=Gene;gene_biotype=protein_coding;locus_tag=CD630_27090
gene21384	AM180355.1	19544	19999	+	gene	ID=gene-CD630_00150	ID=gene-CD630_00150;Name=tadA;gbkey=Gene;gene=tadA;gene_biotype=protein_coding;locus_tag=CD630_00150
gene21385	AM180355.1	1448300	1448755	+	gene	ID=gene-CD630_12470	ID=gene-CD630_12470;Name=CD630_12470;gbkey=Gene;gene_biotype=protein_coding;locus_tag=CD630_12470
gene21386	AM180355.1	1593918	1594373	-	gene	ID=gene-CD630_13770	ID=gene-CD630_13770;Name=CD630_13770;gbkey=Gene;gene_biotype=protein_coding;locus_tag=CD630_13770
gene21387	AM180355.1	1965618	1966073	-	gene	ID=gene-CD630_16940	ID=gene-CD630_16940;Name=CD630_16940;gbkey=Gene;gene_biotype=protein_coding;locus_tag=CD630_16940
gene21388	AM180355.1	2869454	2869909	-	gene	ID=gene-CD630_24880	ID=gene-CD630_24880;Name=CD630_24880;gbkey=Gene;gene_biotype=protein_coding;locus_tag=CD630_24880
gene21390	AM180355.1	4205809	4206264	-	gene	ID=gene-CD630_35980	ID=gene-CD630_35980;Name=luxS;gbkey=Gene;gene=luxS;gene_biotype=protein_coding;locus_tag=CD630_35980
gene2140	AM180355.1	2629541	2631460	-	gene	ID=gene-CD630_22690	ID=gene-CD630_22690;Name=fruABC;gbkey=Gene;gene=fruABC;gene_biotype=protein_coding;locus_tag=CD630_22690
gene21422	AM180355.1	867627	868040	+	gene	ID=gene-CD630_07100	ID=gene-CD630_07100;Name=CD630_07100;gbkey=Gene;gene_biotype=protein_coding;locus_tag=CD630_07100
gene21456	AM180355.1	199087	199539	+	gene	ID=gene-CD630_01490	ID=gene-CD630_01490;Name=CD630_01490;gbkey=Gene;gene_biotype=protein_coding;locus_tag=CD630_01490
gene21457	AM180355.1	1549630	1550082	+	gene	ID=gene-CD630_13350	ID=gene-CD630_13350;Name=CD630_13350;gbkey=Gene;gene_biotype=protein_coding;locus_tag=CD630_13350
gene21458	AM180355.1	2236859	2237311	-	gene	ID=gene-CD630_19390	ID=gene-CD630_19390;Name=accB;gbkey=Gene;gene=accB;gene_biotype=protein_coding;locus_tag=CD630_19390
gene21459	AM180355.1	2589317	2589769	-	gene	ID=gene-CD630_22380	ID=gene-CD630_22380;Name=CD630_22380;gbkey=Gene;gene_biotype=protein_coding;locus_tag=CD630_22380
gene21460	AM180355.1	3792695	3793420	-	gene	ID=gene-CD630_32410	ID=gene-CD630_32410;Name=prdB;gbkey=Gene;gene=prdB;gene_biotype=protein_coding;locus_tag=CD630_32410
gene21461	AM180355.1	4068184	4068636	-	gene	ID=gene-CD630_34800	ID=gene-CD630_34800;Name=rpiB2;gbkey=Gene;gene=rpiB2;gene_biotype=protein_coding;locus_tag=CD630_34800
gene21462	AM180355.1	4219388	4219840	+	gene	ID=gene-CD630_36130	ID=gene-CD630_36130;Name=CD630_36130;gbkey=Gene;gene_biotype=protein_coding;locus_tag=CD630_36130
gene21540	AM180355.1	2821175	2821618	-	gene	ID=gene-CD630_24460	ID=gene-CD630_24460;Name=CD630_24460;gbkey=Gene;gene_biotype=protein_coding;locus_tag=CD630_24460
gene21564	AM180355.1	2426242	2426691	-	gene	ID=gene-CD630_21000	ID=gene-CD630_21000;Name=XdhC3;gbkey=Gene;gene=XdhC3;gene_biotype=protein_coding;locus_tag=CD630_21000
gene21565	AM180355.1	3183093	3183542	-	gene	ID=gene-CD630_27430	ID=gene-CD630_27430;Name=dtd;gbkey=Gene;gene=dtd;gene_biotype=protein_coding;locus_tag=CD630_27430
gene21567	AM180355.1	4068653	4069102	-	gene	ID=gene-CD630_34810	ID=gene-CD630_34810;Name=CD630_34810;gbkey=Gene;gene_biotype=protein_coding;locus_tag=CD630_34810
gene21568	AM180355.1	4225539	4225988	-	gene	ID=gene-CD630_36190	ID=gene-CD630_36190;Name=CD630_36190;gbkey=Gene;gene_biotype=protein_coding;locus_tag=CD630_36190
gene21569	AM180355.1	4269434	4269883	-	gene	ID=gene-CD630_36580	ID=gene-CD630_36580;Name=rplI;gbkey=Gene;gene=rplI;gene_biotype=protein_coding;locus_tag=CD630_36580
gene2157	AM180355.1	2877341	2879224	-	gene	ID=gene-CD630_24930	ID=gene-CD630_24930;Name=selB;gbkey=Gene;gene=selB;gene_biotype=protein_coding;locus_tag=CD630_24930
gene21570	AM180355.1	2210211	2210645	+	gene	ID=gene-CD630_19090	ID=gene-CD630_19090;Name=eutP;gbkey=Gene;gene=eutP;gene_biotype=protein_coding;locus_tag=CD630_19090
gene2163	AM180355.1	3466606	3468522	-	gene	ID=gene-CD630_29840	ID=gene-CD630_29840;Name=CD630_29840;gbkey=Gene;gene_biotype=protein_coding;locus_tag=CD630_29840
gene21654	AM180355.1	1486524	1486964	+	gene	ID=gene-CD630_12800	ID=gene-CD630_12800;Name=CD630_12800;gbkey=Gene;gene_biotype=protein_coding;locus_tag=CD630_12800
gene21687	AM180355.1	1058187	1058633	+	gene	ID=gene-CD630_08800	ID=gene-CD630_08800;Name=CD630_08800;gbkey=Gene;gene_biotype=protein_coding;locus_tag=CD630_08800
gene21688	AM180355.1	1152017	1152463	+	gene	ID=gene-CD630_09880	ID=gene-CD630_09880;Name=CD630_09880;gbkey=Gene;gene_biotype=protein_coding;locus_tag=CD630_09880
gene21689	AM180355.1	1484813	1485259	+	gene	ID=gene-CD630_12780	ID=gene-CD630_12780;Name=iscR;gbkey=Gene;gene=iscR;gene_biotype=protein_coding;locus_tag=CD630_12780
gene21690	AM180355.1	1578741	1579187	+	gene	ID=gene-CD630_13650	ID=gene-CD630_13650;Name=CD630_13650;gbkey=Gene;gene_biotype=protein_coding;locus_tag=CD630_13650
gene21691	AM180355.1	1691646	1692092	+	gene	ID=gene-CD630_14630	ID=gene-CD630_14630;Name=CD630_14630;gbkey=Gene;gene_biotype=protein_coding;locus_tag=CD630_14630
gene21692	AM180355.1	2237581	2238036	-	gene	ID=gene-CD630_19400	ID=gene-CD630_19400;Name=CD630_19400;gbkey=Gene;gene_biotype=protein_coding;locus_tag=CD630_19400
gene21693	AM180355.1	2401687	2402133	-	gene	ID=gene-CD630_20810	ID=gene-CD630_20810;Name=xdhC1;gbkey=Gene;gene=xdhC1;gene_biotype=protein_coding;locus_tag=CD630_20810
gene21694	AM180355.1	2647187	2647633	-	gene	ID=gene-CD630_22820	ID=gene-CD630_22820;Name=CD630_22820;gbkey=Gene;gene_biotype=protein_coding;locus_tag=CD630_22820
gene21695	AM180355.1	2682762	2683208	-	gene	ID=gene-CD630_23200	ID=gene-CD630_23200;Name=rpiB1;gbkey=Gene;gene=rpiB1;gene_biotype=protein_coding;locus_tag=CD630_23200
gene21696	AM180355.1	3005397	3005843	-	gene	ID=gene-CD630_25970	ID=gene-CD630_25970;Name=lspA;gbkey=Gene;gene=lspA;gene_biotype=protein_coding;locus_tag=CD630_25970
gene217	AM180355.1	1227866	1231693	+	gene	ID=gene-CD630_10410	ID=gene-CD630_10410;Name=addA;gbkey=Gene;gene=addA;gene_biotype=protein_coding;locus_tag=CD630_10410
gene21759	AM180355.1	3854796	3855239	-	gene	ID=gene-CD630_32920	ID=gene-CD630_32920;Name=CD630_32920;gbkey=Gene;gene_biotype=protein_coding;locus_tag=CD630_32920
gene2178	AM180355.1	225445	227358	-	gene	ID=gene-CD630_01700	ID=gene-CD630_01700;Name=CD630_01700;gbkey=Gene;gene_biotype=protein_coding;locus_tag=CD630_01700
gene21799	AM180355.1	369408	369851	+	gene	ID=gene-CD630_03070	ID=gene-CD630_03070;Name=CD630_03070;gbkey=Gene;gene_biotype=protein_coding;locus_tag=CD630_03070
gene2180	AM180355.1	3218877	3220790	-	gene	ID=gene-CD630_27690	ID=gene-CD630_27690;Name=CD630_27690;gbkey=Gene;gene_biotype=protein_coding;locus_tag=CD630_27690
gene21801	AM180355.1	962701	963144	+	gene	ID=gene-CD630_07900	ID=gene-CD630_07900;Name=CD630_07900;gbkey=Gene;gene_biotype=protein_coding;locus_tag=CD630_07900
gene21802	AM180355.1	1325702	1326145	+	gene	ID=gene-CD630_11270	ID=gene-CD630_11270;Name=CD630_11270;gbkey=Gene;gene_biotype=protein_coding;locus_tag=CD630_11270
gene21803	AM180355.1	1576661	1577104	+	gene	ID=gene-CD630_13620	ID=gene-CD630_13620;Name=CD630_13620;gbkey=Gene;gene_biotype=protein_coding;locus_tag=CD630_13620
gene21804	AM180355.1	2113580	2114023	+	gene	ID=gene-CD630_18270	ID=gene-CD630_18270;Name=CD630_18270;gbkey=Gene;gene_biotype=protein_coding;locus_tag=CD630_18270
gene21853	AM180355.1	2202068	2202505	-	gene	ID=gene-CD630_18990	ID=gene-CD630_18990;Name=CD630_18990;gbkey=Gene;gene_biotype=protein_coding;locus_tag=CD630_18990
gene21914	AM180355.1	646067	646507	+	gene	ID=gene-CD630_05400	ID=gene-CD630_05400;Name=cheW;gbkey=Gene;gene=cheW;gene_biotype=protein_coding;locus_tag=CD630_05400
gene21916	AM180355.1	1410796	1411236	-	gene	ID=gene-CD630_12120	ID=gene-CD630_12120;Name=bltD;gbkey=Gene;gene=bltD;gene_biotype=protein_coding;locus_tag=CD630_12120
gene21917	AM180355.1	1505085	1505525	+	gene	ID=gene-CD630_12990	ID=gene-CD630_12990;Name=CD630_12990;gbkey=Gene;gene_biotype=protein_coding;locus_tag=CD630_12990
gene21918	AM180355.1	1575972	1576412	+	gene	ID=gene-CD630_13610	ID=gene-CD630_13610;Name=CD630_13610;gbkey=Gene;gene_biotype=protein_coding;locus_tag=CD630_13610
gene21919	AM180355.1	1761143	1761583	-	gene	ID=gene-CD630_15190	ID=gene-CD630_15190;Name=CD630_15190;gbkey=Gene;gene_biotype=protein_coding;locus_tag=CD630_15190
gene21920	AM180355.1	3165661	3166101	-	gene	ID=gene-CD630_27290	ID=gene-CD630_27290;Name=CD630_27290;gbkey=Gene;gene_biotype=protein_coding;locus_tag=CD630_27290
gene2195	AM180355.1	3330441	3332351	-	gene	ID=gene-CD630_28490	ID=gene-CD630_28490;Name=phnXW;gbkey=Gene;gene=phnXW;gene_biotype=protein_coding;locus_tag=CD630_28490
gene22000	AM180355.1	944363	944800	+	gene	ID=gene-CD630_07730	ID=gene-CD630_07730;Name=spoVAC;gbkey=Gene;gene=spoVAC;gene_biotype=protein_coding;locus_tag=CD630_07730
gene22035	AM180355.1	1147631	1148068	+	gene	ID=gene-CD630_09840	ID=gene-CD630_09840;Name=CD630_09840;gbkey=Gene;gene_biotype=protein_coding;locus_tag=CD630_09840
gene22036	AM180355.1	1404091	1404528	+	gene	ID=gene-CD630_12060	ID=gene-CD630_12060;Name=CD630_12060;gbkey=Gene;gene_biotype=protein_coding;locus_tag=CD630_12060
gene22037	AM180355.1	4065740	4066177	-	gene	ID=gene-CD630_34770	ID=gene-CD630_34770;Name=CD630_34770;gbkey=Gene;gene_biotype=protein_coding;locus_tag=CD630_34770
gene2205	AM180355.1	3649577	3651484	-	gene	ID=gene-CD630_31330	ID=gene-CD630_31330;Name=CD630_31330;gbkey=Gene;gene_biotype=protein_coding;locus_tag=CD630_31330
gene221	AM180355.1	288750	292556	+	gene	ID=gene-CD630_02250	ID=gene-CD630_02250;Name=purL;gbkey=Gene;gene=purL;gene_biotype=protein_coding;locus_tag=CD630_02250
gene22154	AM180355.1	1027707	1028141	-	gene	ID=gene-CD630_08520	ID=gene-CD630_08520;Name=CD630_08520;gbkey=Gene;gene_biotype=protein_coding;locus_tag=CD630_08520
gene22155	AM180355.1	4273562	4273996	-	gene	ID=gene-CD630_36620	ID=gene-CD630_36620;Name=ssb1;gbkey=Gene;gene=ssb1;gene_biotype=protein_coding;locus_tag=CD630_36620
gene22156	AM180355.1	2496038	2496466	+	gene	ID=gene-CD630_21570	ID=gene-CD630_21570;Name=CD630_21570;gbkey=Gene;gene_biotype=protein_coding;locus_tag=CD630_21570
gene2216	AM180355.1	836028	837932	+	gene	ID=gene-CD630_06900	ID=gene-CD630_06900;Name=CD630_06900;gbkey=Gene;gene_biotype=protein_coding;locus_tag=CD630_06900
gene2221	AM180355.1	180593	182506	+	gene	ID=gene-CD630_01340	ID=gene-CD630_01340;Name=CD630_01340;gbkey=Gene;gene_biotype=protein_coding;locus_tag=CD630_01340
gene22256	AM180355.1	2096270	2096683	+	gene	ID=gene-CD630_18130	ID=gene-CD630_18130;Name=CD630_18130;gbkey=Gene;gene_biotype=protein_coding;locus_tag=CD630_18130
gene22257	AM180355.1	2771278	2771709	-	gene	ID=gene-CD630_24030	ID=gene-CD630_24030;Name=dut;gbkey=Gene;gene=dut;gene_biotype=protein_coding;locus_tag=CD630_24030
gene2227	AM180355.1	4145	6046	+	gene	ID=gene-CD630_00050	ID=gene-CD630_00050;Name=gyrB;gbkey=Gene;gene=gyrB;gene_biotype=protein_coding;locus_tag=CD630_00050
gene2228	AM180355.1	230672	232573	+	gene	ID=gene-CD630_01740	ID=gene-CD630_01740;Name=cooS;gbkey=Gene;gene=cooS;gene_biotype=protein_coding;locus_tag=CD630_01740
gene22298	AM180355.1	2518916	2519338	-	gene	ID=gene-CD630_21780	ID=gene-CD630_21780;Name=CD630_21780;gbkey=Gene;gene_biotype=protein_coding;locus_tag=CD630_21780
gene2237	AM180355.1	1559188	1561086	+	gene	ID=gene-CD630_13430	ID=gene-CD630_13430;Name=glnA;gbkey=Gene;gene=glnA;gene_biotype=protein_coding;locus_tag=CD630_13430
gene22370	AM180355.1	172910	173338	+	gene	ID=gene-CD630_01280	ID=gene-CD630_01280;Name=fabZ;gbkey=Gene;gene=fabZ;gene_biotype=protein_coding;locus_tag=CD630_01280
gene22372	AM180355.1	942868	943296	+	gene	ID=gene-CD630_07710	ID=gene-CD630_07710;Name=spoIIAB;gbkey=Gene;gene=spoIIAB;gene_biotype=protein_coding;locus_tag=CD630_07710
gene22373	AM180355.1	1572566	1572994	+	gene	ID=gene-CD630_13560	ID=gene-CD630_13560;Name=CD630_13560;gbkey=Gene;gene_biotype=protein_coding;locus_tag=CD630_13560
gene22374	AM180355.1	1578187	1578615	+	gene	ID=gene-CD630_13640	ID=gene-CD630_13640;Name=CD630_13640;gbkey=Gene;gene_biotype=protein_coding;locus_tag=CD630_13640
gene22376	AM180355.1	1641002	1641430	+	gene	ID=gene-CD630_14160	ID=gene-CD630_14160;Name=CD630_14160;gbkey=Gene;gene_biotype=protein_coding;locus_tag=CD630_14160
gene22378	AM180355.1	2740993	2741421	+	gene	ID=gene-CD630_23740	ID=gene-CD630_23740;Name=CD630_23740;gbkey=Gene;gene_biotype=protein_coding;locus_tag=CD630_23740
gene22380	AM180355.1	4139421	4139849	+	gene	ID=gene-CD630_35440	ID=gene-CD630_35440;Name=CD630_35440;gbkey=Gene;gene_biotype=protein_coding;locus_tag=CD630_35440
gene22402	AM180355.1	4163318	4163731	-	gene	ID=gene-CD630_35610	ID=gene-CD630_35610;Name=CD630_35610;gbkey=Gene;gene_biotype=protein_coding;locus_tag=CD630_35610
gene2247	AM180355.1	3269001	3270896	-	gene	ID=gene-CD630_27990	ID=gene-CD630_27990;Name=cwp8;gbkey=Gene;gene=cwp8;gene_biotype=protein_coding;locus_tag=CD630_27990
gene2248	AM180355.1	3651752	3653647	-	gene	ID=gene-CD630_31340	ID=gene-CD630_31340;Name=CD630_31340;gbkey=Gene;gene_biotype=protein_coding;locus_tag=CD630_31340
gene2249	AM180355.1	4283934	4285829	-	gene	ID=gene-CD630_36750	ID=gene-CD630_36750;Name=mnmG;gbkey=Gene;gene=mnmG;gene_biotype=protein_coding;locus_tag=CD630_36750
gene22502	AM180355.1	1255606	1256031	+	gene	ID=gene-CD630_10630	ID=gene-CD630_10630;Name=CD630_10630;gbkey=Gene;gene_biotype=protein_coding;locus_tag=CD630_10630
gene22503	AM180355.1	1494089	1494514	+	gene	ID=gene-CD630_12850	ID=gene-CD630_12850;Name=CD630_12850;gbkey=Gene;gene_biotype=protein_coding;locus_tag=CD630_12850
gene22505	AM180355.1	3976696	3977121	-	gene	ID=gene-CD630_33980	ID=gene-CD630_33980;Name=CD630_33980;gbkey=Gene;gene_biotype=protein_coding;locus_tag=CD630_33980
gene2258	AM180355.1	3355468	3357360	+	gene	ID=gene-CD630_28690	ID=gene-CD630_28690;Name=CD630_28690;gbkey=Gene;gene_biotype=protein_coding;locus_tag=CD630_28690
gene2259	AM180355.1	4077545	4079317	-	gene	ID=gene-CD630_34890	ID=gene-CD630_34890;Name=CD630_34890;gbkey=Gene;gene_biotype=protein_coding;locus_tag=CD630_34890
gene22604	AM180355.1	1500201	1500623	-	gene	ID=gene-CD630_12920	ID=gene-CD630_12920;Name=CD630_12920;gbkey=Gene;gene_biotype=protein_coding;locus_tag=CD630_12920
gene22606	AM180355.1	2651047	2651469	+	gene	ID=gene-CD630_22840	ID=gene-CD630_22840;Name=CD630_22840;gbkey=Gene;gene_biotype=protein_coding;locus_tag=CD630_22840
gene22607	AM180355.1	2696061	2696483	-	gene	ID=gene-CD630_23320	ID=gene-CD630_23320;Name=mtlF;gbkey=Gene;gene=mtlF;gene_biotype=protein_coding;locus_tag=CD630_23320
gene22608	AM180355.1	3836728	3837150	-	gene	ID=gene-CD630_32780	ID=gene-CD630_32780;Name=CD630_32780;gbkey=Gene;gene_biotype=protein_coding;locus_tag=CD630_32780
gene22609	AM180355.1	3876524	3876946	-	gene	ID=gene-CD630_33110	ID=gene-CD630_33110;Name=CD630_33110;gbkey=Gene;gene_biotype=protein_coding;locus_tag=CD630_33110
gene22702	AM180355.1	418410	418844	-	gene	ID=gene-CD630_03410	ID=gene-CD630_03410;Name=CD630_03410;gbkey=Gene;gene_biotype=protein_coding;locus_tag=CD630_03410
gene22706	AM180355.1	2040602	2041021	+	gene	ID=gene-CD630_17620	ID=gene-CD630_17620;Name=CD630_17620;gbkey=Gene;gene_biotype=protein_coding;locus_tag=CD630_17620
gene22707	AM180355.1	2755580	2755999	-	gene	ID=gene-CD630_23860	ID=gene-CD630_23860;Name=CD630_23860;gbkey=Gene;gene_biotype=protein_coding;locus_tag=CD630_23860
gene22755	AM180355.1	1267974	1268384	+	gene	ID=gene-CD630_10740	ID=gene-CD630_10740;Name=CD630_10740;gbkey=Gene;gene_biotype=protein_coding;locus_tag=CD630_10740
gene22764	AM180355.1	3882086	3884230	-	gene	ID=gene-CD630_33170	ID=gene-CD630_33170;Name=fdhF;gbkey=Gene;gene=fdhF;gene_biotype=protein_coding;locus_tag=CD630_33170
gene2281	AM180355.1	2869924	2871813	-	gene	ID=gene-CD630_24890	ID=gene-CD630_24890;Name=CD630_24890;gbkey=Gene;gene_biotype=protein_coding;locus_tag=CD630_24890
gene22848	AM180355.1	339229	339645	+	gene	ID=gene-CD630_02770	ID=gene-CD630_02770;Name=CD630_02770;gbkey=Gene;gene_biotype=protein_coding;locus_tag=CD630_02770
gene22849	AM180355.1	897764	898180	+	gene	ID=gene-CD630_07350	ID=gene-CD630_07350;Name=CD630_07350;gbkey=Gene;gene_biotype=protein_coding;locus_tag=CD630_07350
gene22853	AM180355.1	4050780	4051196	-	gene	ID=gene-CD630_34570	ID=gene-CD630_34570;Name=CD630_34570;gbkey=Gene;gene_biotype=protein_coding;locus_tag=CD630_34570
gene2289	AM180355.1	1890688	1892562	+	gene	ID=gene-CD630_16320	ID=gene-CD630_16320;Name=asnB1;gbkey=Gene;gene=asnB1;gene_biotype=protein_coding;locus_tag=CD630_16320
gene2290	AM180355.1	3984501	3986387	+	gene	ID=gene-CD630_34060	ID=gene-CD630_34060;Name=CD630_34060;gbkey=Gene;gene_biotype=protein_coding;locus_tag=CD630_34060
gene22902	AM180355.1	1027306	1027704	-	gene	ID=gene-CD630_08510	ID=gene-CD630_08510;Name=CD630_08510;gbkey=Gene;gene_biotype=protein_coding;locus_tag=CD630_08510
gene22906	AM180355.1	2815189	2815590	-	gene	ID=gene-CD630_24380	ID=gene-CD630_24380;Name=cdd;gbkey=Gene;gene=cdd;gene_biotype=protein_coding;locus_tag=CD630_24380
gene22955	AM180355.1	1071633	1072046	+	gene	ID=gene-CD630_08890	ID=gene-CD630_08890;Name=speH;gbkey=Gene;gene=speH;gene_biotype=protein_coding;locus_tag=CD630_08890
gene22956	AM180355.1	1351740	1352153	+	gene	ID=gene-CD630_11530	ID=gene-CD630_11530;Name=mgsA;gbkey=Gene;gene=mgsA;gene_biotype=protein_coding;locus_tag=CD630_11530
gene22957	AM180355.1	2337785	2338198	+	gene	ID=gene-CD630_20260	ID=gene-CD630_20260;Name=CD630_20260;gbkey=Gene;gene_biotype=protein_coding;locus_tag=CD630_20260
gene22960	AM180355.1	3732344	3732757	-	gene	ID=gene-CD630_31900	ID=gene-CD630_31900;Name=CD630_31900;gbkey=Gene;gene_biotype=protein_coding;locus_tag=CD630_31900
gene2298	AM180355.1	2535368	2537251	-	gene	ID=gene-CD630_21900	ID=gene-CD630_21900;Name=CD630_21900;gbkey=Gene;gene_biotype=protein_coding;locus_tag=CD630_21900
gene23071	AM180355.1	654123	654533	+	gene	ID=gene-CD630_05490	ID=gene-CD630_05490;Name=CD630_05490;gbkey=Gene;gene_biotype=protein_coding;locus_tag=CD630_05490
gene23072	AM180355.1	985481	985891	+	gene	ID=gene-CD630_08120	ID=gene-CD630_08120;Name=CD630_08120;gbkey=Gene;gene_biotype=protein_coding;locus_tag=CD630_08120
gene23160	AM180355.1	9450	9857	+	gene	ID=gene-CD630_00100	ID=gene-CD630_00100;Name=rsbW;gbkey=Gene;gene=rsbW;gene_biotype=protein_coding;locus_tag=CD630_00100
gene23161	AM180355.1	581655	582062	+	gene	ID=gene-CD630_04910	ID=gene-CD630_04910;Name=CD630_04910;gbkey=Gene;gene_biotype=protein_coding;locus_tag=CD630_04910
gene23162	AM180355.1	763670	764077	+	gene	ID=gene-CD630_06410	ID=gene-CD630_06410;Name=CD630_06410;gbkey=Gene;gene_biotype=protein_coding;locus_tag=CD630_06410
gene23167	AM180355.1	3543906	3544214	-	gene	ID=gene-CD630_30500	ID=gene-CD630_30500;Name=CD630_30500;gbkey=Gene;gene_biotype=protein_coding;locus_tag=CD630_30500
gene2317	AM180355.1	3793823	3795703	-	gene	ID=gene-CD630_32440	ID=gene-CD630_32440;Name=prdA;gbkey=Gene;gene=prdA;gene_biotype=protein_coding;locus_tag=CD630_32440
gene23237	AM180355.1	1595986	1596384	-	gene	ID=gene-CD630_13790	ID=gene-CD630_13790;Name=CD630_13790;gbkey=Gene;gene_biotype=protein_coding;locus_tag=CD630_13790
gene23271	AM180355.1	347642	348043	+	gene	ID=gene-CD630_02860	ID=gene-CD630_02860;Name=CD630_02860;gbkey=Gene;gene_biotype=protein_coding;locus_tag=CD630_02860
gene23284	AM180355.1	346714	347118	+	gene	ID=gene-CD630_02840	ID=gene-CD630_02840;Name=CD630_02840;gbkey=Gene;gene_biotype=protein_coding;locus_tag=CD630_02840
gene23285	AM180355.1	669424	669828	-	gene	ID=gene-CD630_05620	ID=gene-CD630_05620;Name=CD630_05620;gbkey=Gene;gene_biotype=protein_coding;locus_tag=CD630_05620
gene23287	AM180355.1	2334650	2335054	-	gene	ID=gene-CD630_20220	ID=gene-CD630_20220;Name=CD630_20220;gbkey=Gene;gene_biotype=protein_coding;locus_tag=CD630_20220
gene23288	AM180355.1	3631869	3632273	-	gene	ID=gene-CD630_31180	ID=gene-CD630_31180;Name=CD630_31180;gbkey=Gene;gene_biotype=protein_coding;locus_tag=CD630_31180
gene23289	AM180355.1	4226155	4226523	-	gene	ID=gene-CD630_36200	ID=gene-CD630_36200;Name=CD630_36200;gbkey=Gene;gene_biotype=protein_coding;locus_tag=CD630_36200
gene23290	AM180355.1	3563116	3563520	-	gene	ID=gene-CD630_30670	ID=gene-CD630_30670;Name=xynA;gbkey=Gene;gene=xynA;gene_biotype=protein_coding;locus_tag=CD630_30670
gene23300	AM180355.1	2671076	2671426	+	gene	ID=gene-CD630_23070	ID=gene-CD630_23070;Name=CD630_23070;gbkey=Gene;gene_biotype=protein_coding;locus_tag=CD630_23070
gene2331	AM180355.1	988673	990469	+	gene	ID=gene-CD630_08160	ID=gene-CD630_08160;Name=bglF1;gbkey=Gene;gene=bglF1;gene_biotype=protein_coding;is_ordered=true;locus_tag=CD630_08160;part=1/2
gene23385	AM180355.1	3166452	3166853	-	gene	ID=gene-CD630_27310	ID=gene-CD630_27310;Name=CD630_27310;gbkey=Gene;gene_biotype=protein_coding;locus_tag=CD630_27310
gene23386	AM180355.1	3935041	3935442	-	gene	ID=gene-CD630_33681	ID=gene-CD630_33681;Name=CD630_33681;gbkey=Gene;gene_biotype=protein_coding;locus_tag=CD630_33681
gene23439	AM180355.1	1258272	1258712	-	gene	ID=gene-CD630_10650	ID=gene-CD630_10650;Name=CD630_10650;gbkey=Gene;gene_biotype=protein_coding;locus_tag=CD630_10650
gene2345	AM180355.1	2457436	2459307	-	gene	ID=gene-CD630_21230	ID=gene-CD630_21230;Name=CD630_21230;gbkey=Gene;gene_biotype=protein_coding;locus_tag=CD630_21230
gene23468	AM180355.1	1399745	1400107	+	gene	ID=gene-CD630_12000	ID=gene-CD630_12000;Name=CD630_12000;gbkey=Gene;gene_biotype=protein_coding;locus_tag=CD630_12000
gene2347	AM180355.1	3628349	3630220	-	gene	ID=gene-CD630_31160	ID=gene-CD630_31160;Name=bglF3;gbkey=Gene;gene=bglF3;gene_biotype=protein_coding;locus_tag=CD630_31160
gene23631	AM180355.1	1670677	1671048	+	gene	ID=gene-CD630_14390	ID=gene-CD630_14390;Name=CD630_14390;gbkey=Gene;gene_biotype=protein_coding;locus_tag=CD630_14390
gene23632	AM180355.1	3113269	3113658	-	gene	ID=gene-CD630_26940	ID=gene-CD630_26940;Name=CD630_26940;gbkey=Gene;gene_biotype=protein_coding;locus_tag=CD630_26940
gene23635	AM180355.1	340278	340673	+	gene	ID=gene-CD630_02790	ID=gene-CD630_02790;Name=CD630_02790;gbkey=Gene;gene_biotype=protein_coding;locus_tag=CD630_02790
gene23656	AM180355.1	407612	407953	-	gene	ID=gene-CD630_03350	ID=gene-CD630_03350;Name=CD630_03350;gbkey=Gene;gene_biotype=protein_coding;locus_tag=CD630_03350
gene2368	AM180355.1	1066670	1068535	+	gene	ID=gene-CD630_08860	ID=gene-CD630_08860;Name=CD630_08860;gbkey=Gene;gene_biotype=protein_coding;locus_tag=CD630_08860
gene2369	AM180355.1	1404562	1406427	+	gene	ID=gene-CD630_12070	ID=gene-CD630_12070;Name=dxs;gbkey=Gene;gene=dxs;gene_biotype=protein_coding;locus_tag=CD630_12070
gene2370	AM180355.1	3128684	3130552	-	gene	ID=gene-CD630_27060	ID=gene-CD630_27060;Name=CD630_27060;gbkey=Gene;gene_biotype=protein_coding;locus_tag=CD630_27060
gene23837	AM180355.1	813559	813948	+	gene	ID=gene-CD630_06700	ID=gene-CD630_06700;Name=CD630_06700;gbkey=Gene;gene_biotype=protein_coding;locus_tag=CD630_06700
gene23838	AM180355.1	1000875	1001264	+	gene	ID=gene-CD630_08260	ID=gene-CD630_08260;Name=CD630_08260;gbkey=Gene;gene_biotype=protein_coding;locus_tag=CD630_08260
gene23840	AM180355.1	1691065	1691454	-	gene	ID=gene-CD630_14620	ID=gene-CD630_14620;Name=CD630_14620;gbkey=Gene;gene_biotype=protein_coding;locus_tag=CD630_14620
gene23877	AM180355.1	1361218	1361529	+	gene	ID=gene-CD630_11610	ID=gene-CD630_11610;Name=rplU;gbkey=Gene;gene=rplU;gene_biotype=protein_coding;locus_tag=CD630_11610
gene2391	AM180355.1	1188033	1189895	+	gene	ID=gene-CD630_10180	ID=gene-CD630_10180;Name=CD630_10180;gbkey=Gene;gene_biotype=protein_coding;locus_tag=CD630_10180
gene23947	AM180355.1	964556	964942	-	gene	ID=gene-CD630_07930	ID=gene-CD630_07930;Name=CD630_07930;gbkey=Gene;gene_biotype=protein_coding;locus_tag=CD630_07930
gene23948	AM180355.1	1001301	1001687	+	gene	ID=gene-CD630_08270	ID=gene-CD630_08270;Name=rbo;gbkey=Gene;gene=rbo;gene_biotype=protein_coding;locus_tag=CD630_08270
gene23950	AM180355.1	1396000	1396386	+	gene	ID=gene-CD630_11950	ID=gene-CD630_11950;Name=spoIIIAD;gbkey=Gene;gene=spoIIIAD;gene_biotype=protein_coding;locus_tag=CD630_11950
gene23951	AM180355.1	4064937	4065323	-	gene	ID=gene-CD630_34750	ID=gene-CD630_34750;Name=atpI2;gbkey=Gene;gene=atpI2;gene_biotype=protein_coding;locus_tag=CD630_34750
gene23971	AM180355.1	909825	910199	+	gene	ID=gene-CD630_07460	ID=gene-CD630_07460;Name=CD630_07460;gbkey=Gene;gene_biotype=protein_coding;locus_tag=CD630_07460
gene2399	AM180355.1	1537759	1539093	+	gene	ID=gene-CD630_13260	ID=gene-CD630_13260;Name=rimO;gbkey=Gene;gene=rimO;gene_biotype=protein_coding;locus_tag=CD630_13260
gene2404	AM180355.1	1913736	1915595	+	gene	ID=gene-CD630_16510	ID=gene-CD630_16510;Name=CD630_16510;gbkey=Gene;gene_biotype=protein_coding;locus_tag=CD630_16510
gene24051	AM180355.1	2198911	2199294	+	gene	ID=gene-CD630_18940	ID=gene-CD630_18940;Name=CD630_18940;gbkey=Gene;gene_biotype=protein_coding;locus_tag=CD630_18940
gene24052	AM180355.1	2199802	2200185	+	gene	ID=gene-CD630_18950	ID=gene-CD630_18950;Name=CD630_18950;gbkey=Gene;gene_biotype=protein_coding;locus_tag=CD630_18950
gene2415	AM180355.1	1828996	1830852	+	gene	ID=gene-CD630_15790	ID=gene-CD630_15790;Name=CD630_15790;gbkey=Gene;gene_biotype=protein_coding;locus_tag=CD630_15790
gene24205	AM180355.1	1520506	1520886	+	pseudogene	ID=gene-CD630_13100	ID=gene-CD630_13100;Name=rbfA;gbkey=Gene;gene=rbfA;gene_biotype=pseudogene;locus_tag=CD630_13100;pseudo=true;pseudogene=unknown
gene24207	AM180355.1	2901343	2901723	-	gene	ID=gene-CD630_25130	ID=gene-CD630_25130;Name=CD630_25130;gbkey=Gene;gene_biotype=protein_coding;locus_tag=CD630_25130
gene24208	AM180355.1	4057802	4058182	-	gene	ID=gene-CD630_34660	ID=gene-CD630_34660;Name=acpS;gbkey=Gene;gene=acpS;gene_biotype=protein_coding;locus_tag=CD630_34660
gene24209	AM180355.1	4216929	4217309	-	gene	ID=gene-CD630_36100	ID=gene-CD630_36100;Name=CD630_36100;gbkey=Gene;gene_biotype=protein_coding;locus_tag=CD630_36100
gene24286	AM180355.1	2884106	2884444	-	gene	ID=gene-CD630_24990	ID=gene-CD630_24990;Name=CD630_24990;gbkey=Gene;gene_biotype=protein_coding;locus_tag=CD630_24990
gene24288	AM180355.1	1333408	1333779	+	gene	ID=gene-CD630_11340	ID=gene-CD630_11340;Name=gloA;gbkey=Gene;gene=gloA;gene_biotype=protein_coding;locus_tag=CD630_11340
gene24316	AM180355.1	892293	892670	+	gene	ID=gene-CD630_07290	ID=gene-CD630_07290;Name=gcvH;gbkey=Gene;gene=gcvH;gene_biotype=protein_coding;locus_tag=CD630_07290
gene24317	AM180355.1	964179	964556	-	gene	ID=gene-CD630_07920	ID=gene-CD630_07920;Name=CD630_07920;gbkey=Gene;gene_biotype=protein_coding;locus_tag=CD630_07920
gene24318	AM180355.1	2093917	2094294	+	gene	ID=gene-CD630_18100	ID=gene-CD630_18100;Name=CD630_18100;gbkey=Gene;gene_biotype=protein_coding;locus_tag=CD630_18100
gene24319	AM180355.1	2380224	2380601	-	gene	ID=gene-CD630_20650	ID=gene-CD630_20650;Name=CD630_20650;gbkey=Gene;gene_biotype=protein_coding;locus_tag=CD630_20650
gene24320	AM180355.1	3729845	3730222	-	gene	ID=gene-CD630_31870	ID=gene-CD630_31870;Name=tdcF;gbkey=Gene;gene=tdcF;gene_biotype=protein_coding;locus_tag=CD630_31870
gene24322	AM180355.1	4225000	4225383	+	gene	ID=gene-CD630_36180	ID=gene-CD630_36180;Name=CD630_36180;gbkey=Gene;gene_biotype=protein_coding;locus_tag=CD630_36180
gene2434	AM180355.1	2839854	2841701	-	gene	ID=gene-CD630_24610	ID=gene-CD630_24610;Name=dnaK;gbkey=Gene;gene=dnaK;gene_biotype=protein_coding;locus_tag=CD630_24610
gene24436	AM180355.1	528966	529340	+	gene	ID=gene-CD630_04450	ID=gene-CD630_04450;Name=oraS;gbkey=Gene;gene=oraS;gene_biotype=protein_coding;locus_tag=CD630_04450
gene24438	AM180355.1	2335421	2335795	+	gene	ID=gene-CD630_20230	ID=gene-CD630_20230;Name=CD630_20230;gbkey=Gene;gene_biotype=protein_coding;locus_tag=CD630_20230
gene24446	AM180355.1	1965103	1965474	+	gene	ID=gene-CD630_16930	ID=gene-CD630_16930;Name=CD630_16930;gbkey=Gene;gene_biotype=protein_coding;locus_tag=CD630_16930
gene2446	AM180355.1	2753608	2755449	-	gene	ID=gene-CD630_23850	ID=gene-CD630_23850;Name=CD630_23850;gbkey=Gene;gene_biotype=protein_coding;locus_tag=CD630_23850
gene2448	AM180355.1	1357131	1358975	+	gene	ID=gene-CD630_11580	ID=gene-CD630_11580;Name=CD630_11580;gbkey=Gene;gene_biotype=protein_coding;locus_tag=CD630_11580
gene24516	AM180355.1	2075085	2075453	+	gene	ID=gene-CD630_17930	ID=gene-CD630_17930;Name=CD630_17930;gbkey=Gene;gene_biotype=protein_coding;locus_tag=CD630_17930
gene24540	AM180355.1	3055470	3055823	-	gene	ID=gene-CD630_26470	ID=gene-CD630_26470;Name=CD630_26470;gbkey=Gene;gene_biotype=protein_coding;locus_tag=CD630_26470
gene24562	AM180355.1	1985501	1985872	+	gene	ID=gene-CD630_17100	ID=gene-CD630_17100;Name=CD630_17100;gbkey=Gene;gene_biotype=protein_coding;locus_tag=CD630_17100
gene24563	AM180355.1	2232675	2233046	-	gene	ID=gene-CD630_19340	ID=gene-CD630_19340;Name=CD630_19340;gbkey=Gene;gene_biotype=protein_coding;locus_tag=CD630_19340
gene24564	AM180355.1	2327638	2328009	+	gene	ID=gene-CD630_20170	ID=gene-CD630_20170;Name=CD630_20170;gbkey=Gene;gene_biotype=protein_coding;locus_tag=CD630_20170
gene24565	AM180355.1	2863703	2864074	-	gene	ID=gene-CD630_24820	ID=gene-CD630_24820;Name=CD630_24820;gbkey=Gene;gene_biotype=protein_coding;locus_tag=CD630_24820
gene2459	AM180355.1	2931342	2933183	-	gene	ID=gene-CD630_25370	ID=gene-CD630_25370;Name=CD630_25370;gbkey=Gene;gene_biotype=protein_coding;locus_tag=CD630_25370
gene24673	AM180355.1	1363605	1363973	+	gene	ID=gene-CD630_11650	ID=gene-CD630_11650;Name=CD630_11650;gbkey=Gene;gene_biotype=protein_coding;locus_tag=CD630_11650
gene24674	AM180355.1	1455744	1456112	+	gene	ID=gene-CD630_12511	ID=gene-CD630_12511;Name=CD630_12511;gbkey=Gene;gene_biotype=protein_coding;locus_tag=CD630_12511
gene24675	AM180355.1	1740658	1741026	+	gene	ID=gene-CD630_15030	ID=gene-CD630_15030;Name=CD630_15030;gbkey=Gene;gene_biotype=protein_coding;locus_tag=CD630_15030
gene24676	AM180355.1	1873455	1873823	+	gene	ID=gene-CD630_16170	ID=gene-CD630_16170;Name=CD630_16170;gbkey=Gene;gene_biotype=protein_coding;locus_tag=CD630_16170
gene24677	AM180355.1	1964732	1965100	+	gene	ID=gene-CD630_16920	ID=gene-CD630_16920;Name=CD630_16920;gbkey=Gene;gene_biotype=protein_coding;locus_tag=CD630_16920
gene24798	AM180355.1	1681013	1681378	+	gene	ID=gene-CD630_14510	ID=gene-CD630_14510;Name=folB;gbkey=Gene;gene=folB;gene_biotype=protein_coding;locus_tag=CD630_14510
gene24800	AM180355.1	3635482	3635847	-	gene	ID=gene-CD630_31220	ID=gene-CD630_31220;Name=CD630_31220;gbkey=Gene;gene_biotype=protein_coding;locus_tag=CD630_31220
gene24801	AM180355.1	3852461	3852826	-	gene	ID=gene-CD630_32890	ID=gene-CD630_32890;Name=CD630_32890;gbkey=Gene;gene_biotype=protein_coding;locus_tag=CD630_32890
gene2485	AM180355.1	163383	163400	+	sequence_feature	ID=id-CD630_01200	ID=id-CD630_01200;Note=PS00443
gene2486	AM180355.1	2560577	2562409	-	gene	ID=gene-CD630_22100	ID=gene-CD630_22100;Name=CD630_22100;gbkey=Gene;gene_biotype=protein_coding;locus_tag=CD630_22100
gene24875	AM180355.1	1445294	1445668	+	gene	ID=gene-CD630_12420	ID=gene-CD630_12420;Name=CD630_12420;gbkey=Gene;gene_biotype=protein_coding;locus_tag=CD630_12420
gene24924	AM180355.1	536473	536835	+	gene	ID=gene-CD630_04510	ID=gene-CD630_04510;Name=CD630_04510;gbkey=Gene;gene_biotype=protein_coding;locus_tag=CD630_04510
gene24925	AM180355.1	638828	639190	+	gene	ID=gene-CD630_05330	ID=gene-CD630_05330;Name=cheY;gbkey=Gene;gene=cheY;gene_biotype=protein_coding;locus_tag=CD630_05330
gene24926	AM180355.1	945994	946356	+	gene	ID=gene-CD630_07750	ID=gene-CD630_07750;Name=spoVAE;gbkey=Gene;gene=spoVAE;gene_biotype=protein_coding;locus_tag=CD630_07750
gene24927	AM180355.1	2058291	2058653	+	gene	ID=gene-CD630_17770	ID=gene-CD630_17770;Name=CD630_17770;gbkey=Gene;gene_biotype=protein_coding;locus_tag=CD630_17770
gene24929	AM180355.1	3271729	3272109	-	gene	ID=gene-CD630_28000	ID=gene-CD630_28000;Name=CD630_28000;gbkey=Gene;gene_biotype=protein_coding;locus_tag=CD630_28000
gene2493	AM180355.1	560426	562225	-	gene	ID=gene-CD630_04700	ID=gene-CD630_04700;Name=blaR;gbkey=Gene;gene=blaR;gene_biotype=protein_coding;locus_tag=CD630_04700
gene24930	AM180355.1	3699428	3699790	+	gene	ID=gene-CD630_31660	ID=gene-CD630_31660;Name=CD630_31660;gbkey=Gene;gene_biotype=protein_coding;locus_tag=CD630_31660
gene24931	AM180355.1	4054871	4055233	-	gene	ID=gene-CD630_34610	ID=gene-CD630_34610;Name=EndoA;gbkey=Gene;gene=EndoA;gene_biotype=protein_coding;locus_tag=CD630_34610
gene24976	AM180355.1	2821990	2822340	-	gene	ID=gene-CD630_24470	ID=gene-CD630_24470;Name=CD630_24470;gbkey=Gene;gene_biotype=protein_coding;locus_tag=CD630_24470
gene2498	AM180355.1	4103315	4104991	-	gene	ID=gene-CD630_35120	ID=gene-CD630_35120;Name=CD630_35120;gbkey=Gene;gene_biotype=protein_coding;locus_tag=CD630_35120
gene24989	AM180355.1	2209853	2210203	+	gene	ID=gene-CD630_19080	ID=gene-CD630_19080;Name=eutS;gbkey=Gene;gene=eutS;gene_biotype=protein_coding;locus_tag=CD630_19080
gene2500	AM180355.1	1509727	1511550	+	gene	ID=gene-CD630_13040	ID=gene-CD630_13040;Name=acd;gbkey=Gene;gene=acd;gene_biotype=protein_coding;locus_tag=CD630_13040
gene25065	AM180355.1	652155	652514	+	gene	ID=gene-CD630_05470	ID=gene-CD630_05470;Name=CD630_05470;gbkey=Gene;gene_biotype=protein_coding;locus_tag=CD630_05470
gene25067	AM180355.1	2787670	2788029	-	gene	ID=gene-CD630_24150	ID=gene-CD630_24150;Name=CD630_24150;gbkey=Gene;gene_biotype=protein_coding;locus_tag=CD630_24150
gene25068	AM180355.1	3856165	3856524	-	gene	ID=gene-CD630_32940	ID=gene-CD630_32940;Name=CD630_32940;gbkey=Gene;gene_biotype=protein_coding;locus_tag=CD630_32940
gene2507	AM180355.1	1682898	1684688	+	gene	ID=gene-CD630_14540	ID=gene-CD630_14540;Name=dnaG;gbkey=Gene;gene=dnaG;gene_biotype=protein_coding;locus_tag=CD630_14540
gene2509	AM180355.1	3991270	3993087	-	gene	ID=gene-CD630_34100	ID=gene-CD630_34100;Name=uvrC;gbkey=Gene;gene=uvrC;gene_biotype=protein_coding;locus_tag=CD630_34100
gene251	AM180355.1	3972006	3975575	-	gene	ID=gene-CD630_33960	ID=gene-CD630_33960;Name=dnaE;gbkey=Gene;gene=dnaE;gene_biotype=protein_coding;locus_tag=CD630_33960
gene2512	AM180355.1	1707377	1709200	+	gene	ID=gene-CD630_14730	ID=gene-CD630_14730;Name=CD630_14730;gbkey=Gene;gene_biotype=protein_coding;locus_tag=CD630_14730
gene2513	AM180355.1	2447691	2449514	+	gene	ID=gene-CD630_21160	ID=gene-CD630_21160;Name=bipA;gbkey=Gene;gene=bipA;gene_biotype=protein_coding;locus_tag=CD630_21160
gene25171	AM180355.1	832016	832372	+	gene	ID=gene-CD630_06870	ID=gene-CD630_06870;Name=rplT;gbkey=Gene;gene=rplT;gene_biotype=protein_coding;locus_tag=CD630_06870
gene25172	AM180355.1	1860067	1860423	+	gene	ID=gene-CD630_16060	ID=gene-CD630_16060;Name=CD630_16060;gbkey=Gene;gene_biotype=protein_coding;locus_tag=CD630_16060
gene25174	AM180355.1	2608312	2608668	+	gene	ID=gene-CD630_22510	ID=gene-CD630_22510;Name=CD630_22510;gbkey=Gene;gene_biotype=protein_coding;locus_tag=CD630_22510
gene25175	AM180355.1	2787279	2787635	-	gene	ID=gene-CD630_24140	ID=gene-CD630_24140;Name=CD630_24140;gbkey=Gene;gene_biotype=protein_coding;locus_tag=CD630_24140
gene25203	AM180355.1	4289035	4289379	-	gene	ID=gene-CD630_36790	ID=gene-CD630_36790;Name=rnpA;gbkey=Gene;gene=rnpA;gene_biotype=protein_coding;locus_tag=CD630_36790
gene25212	AM180355.1	1575181	1575501	-	gene	ID=gene-CD630_13600	ID=gene-CD630_13600;Name=CD630_13600;gbkey=Gene;gene_biotype=protein_coding;locus_tag=CD630_13600
gene25279	AM180355.1	1021334	1021687	-	gene	ID=gene-CD630_08450	ID=gene-CD630_08450;Name=CD630_08450;gbkey=Gene;gene_biotype=protein_coding;locus_tag=CD630_08450
gene25282	AM180355.1	1615599	1615667	-	sequence_feature	ID=id-CD630_13950	ID=id-CD630_13950;Note=4
gene25283	AM180355.1	2538521	2538874	-	gene	ID=gene-CD630_21920	ID=gene-CD630_21920;Name=CD630_21920;gbkey=Gene;gene_biotype=protein_coding;locus_tag=CD630_21920
gene2531	AM180355.1	2114054	2115871	+	gene	ID=gene-CD630_18280	ID=gene-CD630_18280;Name=ftsH1;gbkey=Gene;gene=ftsH1;gene_biotype=protein_coding;locus_tag=CD630_18280
gene25323	AM180355.1	4228108	4228452	-	gene	ID=gene-CD630_36220	ID=gene-CD630_36220;Name=CD630_36220;gbkey=Gene;gene_biotype=protein_coding;locus_tag=CD630_36220
gene25389	AM180355.1	2289019	2289357	+	gene	ID=gene-CD630_19850	ID=gene-CD630_19850;Name=CD630_19850;gbkey=Gene;gene_biotype=protein_coding;locus_tag=CD630_19850
gene25393	AM180355.1	22166	22516	+	gene	ID=gene-CD630_00170	ID=gene-CD630_00170;Name=CD630_00170;gbkey=Gene;gene_biotype=protein_coding;locus_tag=CD630_00170
gene25396	AM180355.1	898196	898546	+	gene	ID=gene-CD630_07360	ID=gene-CD630_07360;Name=CD630_07360;gbkey=Gene;gene_biotype=protein_coding;locus_tag=CD630_07360
gene25397	AM180355.1	1459575	1459925	+	gene	ID=gene-CD630_12570	ID=gene-CD630_12570;Name=rplS;gbkey=Gene;gene=rplS;gene_biotype=protein_coding;locus_tag=CD630_12570
gene25399	AM180355.1	2200187	2200537	+	gene	ID=gene-CD630_18960	ID=gene-CD630_18960;Name=CD630_18960;gbkey=Gene;gene_biotype=protein_coding;locus_tag=CD630_18960
gene25400	AM180355.1	2916007	2916357	-	gene	ID=gene-CD630_25220	ID=gene-CD630_25220;Name=CD630_25220;gbkey=Gene;gene_biotype=protein_coding;locus_tag=CD630_25220
gene25401	AM180355.1	2963476	2963826	-	gene	ID=gene-CD630_25620	ID=gene-CD630_25620;Name=CD630_25620;gbkey=Gene;gene_biotype=protein_coding;locus_tag=CD630_25620
gene2544	AM180355.1	3727644	3729449	-	gene	ID=gene-CD630_31860	ID=gene-CD630_31860;Name=CD630_31860;gbkey=Gene;gene_biotype=protein_coding;locus_tag=CD630_31860
gene255	AM180355.1	1163149	1166697	+	gene	ID=gene-CD630_09970	ID=gene-CD630_09970;Name=CD630_09970;gbkey=Gene;gene_biotype=protein_coding;locus_tag=CD630_09970
gene25506	AM180355.1	2566735	2567073	+	gene	ID=gene-CD630_22140	ID=gene-CD630_22140;Name=SinR;gbkey=Gene;gene=SinR;gene_biotype=protein_coding;locus_tag=CD630_22140
gene25522	AM180355.1	1627286	1627633	+	gene	ID=gene-CD630_14041	ID=gene-CD630_14041;Name=CD630_14041;gbkey=Gene;gene_biotype=protein_coding;locus_tag=CD630_14041
gene25523	AM180355.1	2073121	2073468	-	gene	ID=gene-CD630_17910	ID=gene-CD630_17910;Name=CD630_17910;gbkey=Gene;gene_biotype=protein_coding;locus_tag=CD630_17910
gene25524	AM180355.1	2186387	2186734	+	gene	ID=gene-CD630_18800	ID=gene-CD630_18800;Name=CD630_18800;gbkey=Gene;gene_biotype=protein_coding;locus_tag=CD630_18800
gene25525	AM180355.1	2616773	2617120	-	gene	ID=gene-CD630_22590	ID=gene-CD630_22590;Name=CD630_22590;gbkey=Gene;gene_biotype=protein_coding;locus_tag=CD630_22590
gene25526	AM180355.1	3066672	3067019	-	gene	ID=gene-CD630_26570	ID=gene-CD630_26570;Name=CD630_26570;gbkey=Gene;gene_biotype=protein_coding;locus_tag=CD630_26570
gene2559	AM180355.1	2847944	2849749	-	gene	ID=gene-CD630_24670	ID=gene-CD630_24670;Name=lepA;gbkey=Gene;gene=lepA;gene_biotype=protein_coding;locus_tag=CD630_24670
gene256	AM180355.1	1450780	1454334	+	gene	ID=gene-CD630_12500	ID=gene-CD630_12500;Name=smc;gbkey=Gene;gene=smc;gene_biotype=protein_coding;locus_tag=CD630_12500
gene25630	AM180355.1	2741481	2741789	+	gene	ID=gene-CD630_23750	ID=gene-CD630_23750;Name=CD630_23750;gbkey=Gene;gene_biotype=protein_coding;locus_tag=CD630_23750
gene25689	AM180355.1	980734	981078	-	gene	ID=gene-CD630_08070	ID=gene-CD630_08070;Name=CD630_08070;gbkey=Gene;gene_biotype=protein_coding;locus_tag=CD630_08070
gene25691	AM180355.1	1612363	1612707	-	gene	ID=gene-CD630_13920	ID=gene-CD630_13920;Name=CD630_13920;gbkey=Gene;gene_biotype=protein_coding;locus_tag=CD630_13920
gene25758	AM180355.1	1508335	1508655	-	gene	ID=gene-CD630_13020	ID=gene-CD630_13020;Name=CD630_13020;gbkey=Gene;gene_biotype=protein_coding;locus_tag=CD630_13020
gene25786	AM180355.1	2095778	2096119	+	pseudogene	ID=gene-CD630_18120	ID=gene-CD630_18120;Name=CD630_18120;gbkey=Gene;gene_biotype=pseudogene;locus_tag=CD630_18120;pseudo=true;pseudogene=unknown
gene2579	AM180355.1	3988331	3990127	-	gene	ID=gene-CD630_34080	ID=gene-CD630_34080;Name=CD630_34080;gbkey=Gene;gene_biotype=protein_coding;locus_tag=CD630_34080
gene25806	AM180355.1	1494592	1494879	+	gene	ID=gene-CD630_12860	ID=gene-CD630_12860;Name=CD630_12860;gbkey=Gene;gene_biotype=protein_coding;locus_tag=CD630_12860
gene25864	AM180355.1	1986051	1986389	+	gene	ID=gene-CD630_17110	ID=gene-CD630_17110;Name=CD630_17110;gbkey=Gene;gene_biotype=protein_coding;locus_tag=CD630_17110
gene2589	AM180355.1	3986410	3988191	+	gene	ID=gene-CD630_34070	ID=gene-CD630_34070;Name=CD630_34070;gbkey=Gene;gene_biotype=protein_coding;locus_tag=CD630_34070
gene2590	AM180355.1	2746318	2748105	-	gene	ID=gene-CD630_23810	ID=gene-CD630_23810;Name=iorA;gbkey=Gene;gene=iorA;gene_biotype=protein_coding;locus_tag=CD630_23810
gene2593	AM180355.1	2618841	2620634	-	gene	ID=gene-CD630_22610	ID=gene-CD630_22610;Name=CD630_22610;gbkey=Gene;gene_biotype=protein_coding;locus_tag=CD630_22610
gene25960	AM180355.1	942519	942854	+	gene	ID=gene-CD630_07700	ID=gene-CD630_07700;Name=spoIIAA;gbkey=Gene;gene=spoIIAA;gene_biotype=protein_coding;locus_tag=CD630_07700
gene25962	AM180355.1	3497768	3498103	-	gene	ID=gene-CD630_30110	ID=gene-CD630_30110;Name=CD630_30110;gbkey=Gene;gene_biotype=protein_coding;locus_tag=CD630_30110
gene25963	AM180355.1	4036177	4036512	-	gene	ID=gene-CD630_34440	ID=gene-CD630_34440;Name=CD630_34440;gbkey=Gene;gene_biotype=protein_coding;locus_tag=CD630_34440
gene25964	AM180355.1	3022966	3023238	-	gene	ID=gene-CD630_26160	ID=gene-CD630_26160;Name=CD630_26160;gbkey=Gene;gene_biotype=protein_coding;locus_tag=CD630_26160
gene25980	AM180355.1	1361544	1361861	+	gene	ID=gene-CD630_11620	ID=gene-CD630_11620;Name=CD630_11620;gbkey=Gene;gene_biotype=protein_coding;locus_tag=CD630_11620
gene25982	AM180355.1	2567095	2567412	+	gene	ID=gene-CD630_22150	ID=gene-CD630_22150;Name=CD630_22150;gbkey=Gene;gene_biotype=protein_coding;locus_tag=CD630_22150
gene2601	AM180355.1	3287001	3288791	-	gene	ID=gene-CD630_28170	ID=gene-CD630_28170;Name=CD630_28170;gbkey=Gene;gene_biotype=protein_coding;locus_tag=CD630_28170
gene26046	AM180355.1	1039717	1040046	+	gene	ID=gene-CD630_08630	ID=gene-CD630_08630;Name=CD630_08630;gbkey=Gene;gene_biotype=protein_coding;locus_tag=CD630_08630
gene26072	AM180355.1	1562534	1562866	+	gene	ID=gene-CD630_13450	ID=gene-CD630_13450;Name=CD630_13450;gbkey=Gene;gene_biotype=protein_coding;locus_tag=CD630_13450
gene26073	AM180355.1	1951254	1951586	+	gene	ID=gene-CD630_16750	ID=gene-CD630_16750;Name=CD630_16750;gbkey=Gene;gene_biotype=protein_coding;locus_tag=CD630_16750
gene26075	AM180355.1	2735262	2735594	-	gene	ID=gene-CD630_23690	ID=gene-CD630_23690;Name=CD630_23690;gbkey=Gene;gene_biotype=protein_coding;locus_tag=CD630_23690
gene2613	AM180355.1	3432464	3434242	-	gene	ID=gene-CD630_29560	ID=gene-CD630_29560;Name=atpA;gbkey=Gene;gene=atpA;gene_biotype=protein_coding;locus_tag=CD630_29560
gene26168	AM180355.1	1038062	1038388	+	gene	ID=gene-CD630_08610	ID=gene-CD630_08610;Name=CD630_08610;gbkey=Gene;gene_biotype=protein_coding;locus_tag=CD630_08610
gene26187	AM180355.1	477999	478328	+	gene	ID=gene-CD630_04040	ID=gene-CD630_04040;Name=CD630_04040;gbkey=Gene;gene_biotype=protein_coding;locus_tag=CD630_04040
gene2619	AM180355.1	3177704	3179491	-	gene	ID=gene-CD630_27390	ID=gene-CD630_27390;Name=aspS;gbkey=Gene;gene=aspS;gene_biotype=protein_coding;locus_tag=CD630_27390
gene26246	AM180355.1	3286531	3286839	+	gene	ID=gene-CD630_28160	ID=gene-CD630_28160;Name=CD630_28160;gbkey=Gene;gene_biotype=protein_coding;locus_tag=CD630_28160
gene2625	AM180355.1	3828020	3829804	-	gene	ID=gene-CD630_32690	ID=gene-CD630_32690;Name=CD630_32690;gbkey=Gene;gene_biotype=protein_coding;locus_tag=CD630_32690
gene26317	AM180355.1	182979	183305	+	gene	ID=gene-CD630_01360	ID=gene-CD630_01360;Name=CD630_01360;gbkey=Gene;gene_biotype=protein_coding;locus_tag=CD630_01360
gene2637	AM180355.1	1543308	1545089	+	gene	ID=gene-CD630_13300	ID=gene-CD630_13300;Name=CD630_13300;gbkey=Gene;gene_biotype=protein_coding;locus_tag=CD630_13300
gene26436	AM180355.1	2654272	2654595	+	gene	ID=gene-CD630_22870	ID=gene-CD630_22870;Name=CD630_22870;gbkey=Gene;gene_biotype=protein_coding;locus_tag=CD630_22870
gene26437	AM180355.1	2721591	2722064	-	gene	ID=gene-CD630_23520	ID=gene-CD630_23520;Name=grdA;gbkey=Gene;gene=grdA;gene_biotype=protein_coding;locus_tag=CD630_23520
gene26438	AM180355.1	3278990	3279313	+	gene	ID=gene-CD630_28090	ID=gene-CD630_28090;Name=CD630_28090;gbkey=Gene;gene_biotype=protein_coding;locus_tag=CD630_28090
gene26439	AM180355.1	3920063	3920386	+	gene	ID=gene-CD630_33560	ID=gene-CD630_33560;Name=CD630_33560;gbkey=Gene;gene_biotype=protein_coding;locus_tag=CD630_33560
gene2647	AM180355.1	2632581	2634359	-	gene	ID=gene-CD630_22710	ID=gene-CD630_22710;Name=CD630_22710;gbkey=Gene;gene_biotype=protein_coding;locus_tag=CD630_22710
gene26521	AM180355.1	2500169	2500486	-	gene	ID=gene-CD630_21610	ID=gene-CD630_21610;Name=CD630_21610;gbkey=Gene;gene_biotype=protein_coding;locus_tag=CD630_21610
gene26536	AM180355.1	579018	579338	+	gene	ID=gene-CD630_04880	ID=gene-CD630_04880;Name=CD630_04880;gbkey=Gene;gene_biotype=protein_coding;locus_tag=CD630_04880
gene26537	AM180355.1	2240366	2240686	-	gene	ID=gene-CD630_19430	ID=gene-CD630_19430;Name=CD630_19430;gbkey=Gene;gene_biotype=protein_coding;locus_tag=CD630_19430
gene26538	AM180355.1	3142666	3142986	-	gene	ID=gene-CD630_27151	ID=gene-CD630_27151;Name=CD630_27151;gbkey=Gene;gene_biotype=protein_coding;locus_tag=CD630_27151
gene26539	AM180355.1	3502408	3502728	-	gene	ID=gene-CD630_30140	ID=gene-CD630_30140;Name=CD630_30140;gbkey=Gene;gene_biotype=protein_coding;locus_tag=CD630_30140
gene26540	AM180355.1	4272853	4273173	-	gene	ID=gene-CD630_36610	ID=gene-CD630_36610;Name=CD630_36610;gbkey=Gene;gene_biotype=protein_coding;locus_tag=CD630_36610
gene2656	AM180355.1	2998152	2999927	+	gene	ID=gene-CD630_25920	ID=gene-CD630_25920;Name=fbpA;gbkey=Gene;gene=fbpA;gene_biotype=protein_coding;locus_tag=CD630_25920
gene2657	AM180355.1	1705592	1707364	+	gene	ID=gene-CD630_14720	ID=gene-CD630_14720;Name=CD630_14720;gbkey=Gene;gene_biotype=protein_coding;locus_tag=CD630_14720
gene26633	AM180355.1	9135	9446	+	gene	ID=gene-CD630_00090	ID=gene-CD630_00090;Name=rsbV;gbkey=Gene;gene=rsbV;gene_biotype=protein_coding;locus_tag=CD630_00090
gene26637	AM180355.1	1929539	1929856	-	gene	ID=gene-CD630_16600	ID=gene-CD630_16600;Name=CD630_16600;gbkey=Gene;gene_biotype=protein_coding;locus_tag=CD630_16600
gene26638	AM180355.1	1963250	1963567	+	gene	ID=gene-CD630_16900	ID=gene-CD630_16900;Name=trxA;gbkey=Gene;gene=trxA;gene_biotype=protein_coding;locus_tag=CD630_16900
gene26639	AM180355.1	2723731	2724048	-	gene	ID=gene-CD630_23550	ID=gene-CD630_23550;Name=trxA2;gbkey=Gene;gene=trxA2;gene_biotype=protein_coding;gene_synonym=17041035,trx
gene26640	AM180355.1	2869078	2869395	-	gene	ID=gene-CD630_24870	ID=gene-CD630_24870;Name=CD630_24870;gbkey=Gene;gene_biotype=protein_coding;locus_tag=CD630_24870
gene26641	AM180355.1	3368890	3369207	-	gene	ID=gene-CD630_28800	ID=gene-CD630_28800;Name=celC;gbkey=Gene;gene=celC;gene_biotype=protein_coding;locus_tag=CD630_28800
gene26643	AM180355.1	3434359	3434676	-	gene	ID=gene-CD630_29561	ID=gene-CD630_29561;Name=atpF;gbkey=Gene;gene=atpF;gene_biotype=protein_coding;locus_tag=CD630_29561
gene26646	AM180355.1	3852139	3852456	-	gene	ID=gene-CD630_32880	ID=gene-CD630_32880;Name=CD630_32880;gbkey=Gene;gene_biotype=protein_coding;locus_tag=CD630_32880
gene2669	AM180355.1	1825729	1827426	+	gene	ID=gene-CD630_15770	ID=gene-CD630_15770;Name=pgm;gbkey=Gene;gene=pgm;gene_biotype=protein_coding;locus_tag=CD630_15770
gene267	AM180355.1	3098685	3102224	-	gene	ID=gene-CD630_26820	ID=gene-CD630_26820;Name=pfo;gbkey=Gene;gene=pfo;gene_biotype=protein_coding;locus_tag=CD630_26820
gene26726	AM180355.1	182647	182955	+	gene	ID=gene-CD630_01350	ID=gene-CD630_01350;Name=CD630_01350;gbkey=Gene;gene_biotype=protein_coding;locus_tag=CD630_01350
gene2677	AM180355.1	389107	390879	+	gene	ID=gene-CD630_03230	ID=gene-CD630_03230;Name=CD630_03230;gbkey=Gene;gene_biotype=protein_coding;locus_tag=CD630_03230
gene2683	AM180355.1	3969026	3970786	-	gene	ID=gene-CD630_33940	ID=gene-CD630_33940;Name=pyk;gbkey=Gene;gene=pyk;gene_biotype=protein_coding;locus_tag=CD630_33940
gene26879	AM180355.1	1014397	1014708	+	gene	ID=gene-CD630_08380	ID=gene-CD630_08380;Name=CD630_08380;gbkey=Gene;gene_biotype=protein_coding;locus_tag=CD630_08380
gene26880	AM180355.1	1518190	1518501	+	gene	ID=gene-CD630_13080	ID=gene-CD630_13080;Name=CD630_13080;gbkey=Gene;gene_biotype=protein_coding;locus_tag=CD630_13080
gene26883	AM180355.1	2423523	2423834	-	gene	ID=gene-CD630_20980	ID=gene-CD630_20980;Name=CD630_20980;gbkey=Gene;gene_biotype=protein_coding;locus_tag=CD630_20980
gene26884	AM180355.1	2922574	2922885	-	gene	ID=gene-CD630_25290	ID=gene-CD630_25290;Name=CD630_25290;gbkey=Gene;gene_biotype=protein_coding;locus_tag=CD630_25290
gene26885	AM180355.1	3372699	3373010	-	gene	ID=gene-CD630_28840	ID=gene-CD630_28840;Name=celA;gbkey=Gene;gene=celA;gene_biotype=protein_coding;locus_tag=CD630_28840
gene26886	AM180355.1	3438697	3439008	-	gene	ID=gene-CD630_29610	ID=gene-CD630_29610;Name=CD630_29610;gbkey=Gene;gene_biotype=protein_coding;locus_tag=CD630_29610
gene26889	AM180355.1	4257465	4257776	-	gene	ID=gene-CD630_36480	ID=gene-CD630_36480;Name=licB;gbkey=Gene;gene=licB;gene_biotype=protein_coding;locus_tag=CD630_36480
gene269	AM180355.1	1232937	1236464	+	gene	ID=gene-CD630_10430	ID=gene-CD630_10430;Name=sbcC;gbkey=Gene;gene=sbcC;gene_biotype=protein_coding;locus_tag=CD630_10430
gene27011	AM180355.1	527157	527465	+	gene	ID=gene-CD630_04430	ID=gene-CD630_04430;Name=ortA;gbkey=Gene;gene=ortA;gene_biotype=protein_coding;locus_tag=CD630_04430
gene27012	AM180355.1	2969118	2969426	+	gene	ID=gene-CD630_25670	ID=gene-CD630_25670;Name=CD630_25670;gbkey=Gene;gene_biotype=protein_coding;locus_tag=CD630_25670
gene27013	AM180355.1	4267574	4267882	-	gene	ID=gene-CD630_36560	ID=gene-CD630_36560;Name=CD630_36560;gbkey=Gene;gene_biotype=protein_coding;locus_tag=CD630_36560
gene2702	AM180355.1	3103999	3105768	-	gene	ID=gene-CD630_26850	ID=gene-CD630_26850;Name=CD630_26850;gbkey=Gene;gene_biotype=protein_coding;locus_tag=CD630_26850
gene27069	AM180355.1	2854576	2854842	+	gene	ID=gene-CD630_24730	ID=gene-CD630_24730;Name=rpsT;gbkey=Gene;gene=rpsT;gene_biotype=protein_coding;locus_tag=CD630_24730
gene27093	AM180355.1	1999657	1999938	+	gene	ID=gene-CD630_17260	ID=gene-CD630_17260;Name=CD630_17260;gbkey=Gene;gene_biotype=protein_coding;locus_tag=CD630_17260
gene2713	AM180355.1	3796132	3797892	-	gene	ID=gene-CD630_32450	ID=gene-CD630_32450;Name=prdR;gbkey=Gene;gene=prdR;gene_biotype=protein_coding;locus_tag=CD630_32450
gene27135	AM180355.1	3488406	3488711	-	gene	ID=gene-CD630_30030	ID=gene-CD630_30030;Name=CD630_30030;gbkey=Gene;gene_biotype=protein_coding;locus_tag=CD630_30030
gene27136	AM180355.1	4036609	4036914	-	gene	ID=gene-CD630_34450	ID=gene-CD630_34450;Name=CD630_34450;gbkey=Gene;gene_biotype=protein_coding;locus_tag=CD630_34450
gene27228	AM180355.1	985913	986215	+	gene	ID=gene-CD630_08130	ID=gene-CD630_08130;Name=CD630_08130;gbkey=Gene;gene_biotype=protein_coding;locus_tag=CD630_08130
gene27229	AM180355.1	1857176	1857478	+	gene	ID=gene-CD630_16020	ID=gene-CD630_16020;Name=CD630_16020;gbkey=Gene;gene_biotype=protein_coding;locus_tag=CD630_16020
gene27230	AM180355.1	2646762	2647064	-	gene	ID=gene-CD630_22810	ID=gene-CD630_22810;Name=CD630_22810;gbkey=Gene;gene_biotype=protein_coding;locus_tag=CD630_22810
gene2728	AM180355.1	871523	873277	+	gene	ID=gene-CD630_07130	ID=gene-CD630_07130;Name=CD630_07130;gbkey=Gene;gene_biotype=protein_coding;locus_tag=CD630_07130
gene27336	AM180355.1	2325483	2325782	-	gene	ID=gene-CD630_20141	ID=gene-CD630_20141;Name=CD630_20141;gbkey=Gene;gene_biotype=protein_coding;locus_tag=CD630_20141
gene27355	AM180355.1	2441402	2441701	-	gene	ID=gene-CD630_21120	ID=gene-CD630_21120;Name=CD630_21120;gbkey=Gene;gene_biotype=protein_coding;locus_tag=CD630_21120
gene27452	AM180355.1	8561	8857	+	gene	ID=gene-CD630_00070	ID=gene-CD630_00070;Name=CD630_00070;gbkey=Gene;gene_biotype=protein_coding;locus_tag=CD630_00070
gene27453	AM180355.1	2302221	2302517	-	gene	ID=gene-CD630_19941	ID=gene-CD630_19941;Name=CD630_19941;gbkey=Gene;gene_biotype=protein_coding;locus_tag=CD630_19941
gene2749	AM180355.1	2946025	2947773	-	gene	ID=gene-CD630_25470	ID=gene-CD630_25470;Name=CD630_25470;gbkey=Gene;gene_biotype=protein_coding;locus_tag=CD630_25470
gene27553	AM180355.1	277986	278279	-	gene	ID=gene-CD630_02130	ID=gene-CD630_02130;Name=CD630_02130;gbkey=Gene;gene_biotype=protein_coding;locus_tag=CD630_02130
gene27554	AM180355.1	3166116	3166409	-	gene	ID=gene-CD630_27300	ID=gene-CD630_27300;Name=CD630_27300;gbkey=Gene;gene_biotype=protein_coding;locus_tag=CD630_27300
gene27555	AM180355.1	3272149	3272442	-	gene	ID=gene-CD630_28010	ID=gene-CD630_28010;Name=CD630_28010;gbkey=Gene;gene_biotype=protein_coding;locus_tag=CD630_28010
gene2762	AM180355.1	843551	845293	-	gene	ID=gene-CD630_06950	ID=gene-CD630_06950;Name=CD630_06950;gbkey=Gene;gene_biotype=protein_coding;locus_tag=CD630_06950
gene27702	AM180355.1	1361875	1362165	+	gene	ID=gene-CD630_11630	ID=gene-CD630_11630;Name=rpmA;gbkey=Gene;gene=rpmA;gene_biotype=protein_coding;locus_tag=CD630_11630
gene27703	AM180355.1	2284781	2285071	-	gene	ID=gene-CD630_19801	ID=gene-CD630_19801;Name=CD630_19801;gbkey=Gene;gene_biotype=protein_coding;locus_tag=CD630_19801
gene27735	AM180355.1	3793458	3793742	-	gene	ID=gene-CD630_32430	ID=gene-CD630_32430;Name=CD630_32430;gbkey=Gene;gene_biotype=protein_coding;locus_tag=CD630_32430
gene27754	AM180355.1	1998227	1998493	-	gene	ID=gene-CD630_17240	ID=gene-CD630_17240;Name=CD630_17240;gbkey=Gene;gene_biotype=protein_coding;locus_tag=CD630_17240
gene27795	AM180355.1	1937012	1937191	+	gene	ID=gene-CD630_16632	ID=gene-CD630_16632;Name=CD630_16632;gbkey=Gene;gene_biotype=protein_coding;locus_tag=CD630_16632
gene27796	AM180355.1	2219567	2219854	+	gene	ID=gene-CD630_19180	ID=gene-CD630_19180;Name=eutK;gbkey=Gene;gene=eutK;gene_biotype=protein_coding;locus_tag=CD630_19180
gene27799	AM180355.1	4055223	4055510	-	gene	ID=gene-CD630_34620	ID=gene-CD630_34620;Name=CD630_34620;gbkey=Gene;gene_biotype=protein_coding;locus_tag=CD630_34620
gene27800	AM180355.1	4238355	4238642	-	gene	ID=gene-CD630_36300	ID=gene-CD630_36300;Name=CD630_36300;gbkey=Gene;gene_biotype=protein_coding;locus_tag=CD630_36300
gene27815	AM180355.1	2688756	2689031	-	gene	ID=gene-CD630_23260	ID=gene-CD630_23260;Name=CD630_23260;gbkey=Gene;gene_biotype=protein_coding;locus_tag=CD630_23260
gene2782	AM180355.1	1186269	1187996	+	gene	ID=gene-CD630_10170	ID=gene-CD630_10170;Name=CD630_10170;gbkey=Gene;gene_biotype=protein_coding;locus_tag=CD630_10170
gene27903	AM180355.1	251943	252227	+	gene	ID=gene-CD630_01930	ID=gene-CD630_01930;Name=groS;gbkey=Gene;gene=groS;gene_biotype=protein_coding;locus_tag=CD630_01930
gene27905	AM180355.1	1350200	1350484	+	gene	ID=gene-CD630_11510	ID=gene-CD630_11510;Name=minE;gbkey=Gene;gene=minE;gene_biotype=protein_coding;locus_tag=CD630_11510
gene27907	AM180355.1	1996834	1997118	-	gene	ID=gene-CD630_17220	ID=gene-CD630_17220;Name=CD630_17220;gbkey=Gene;gene_biotype=protein_coding;locus_tag=CD630_17220
gene27910	AM180355.1	4083283	4083567	-	gene	ID=gene-CD630_34920	ID=gene-CD630_34920;Name=CD630_34920;gbkey=Gene;gene_biotype=protein_coding;locus_tag=CD630_34920
gene2794	AM180355.1	1646344	1648077	-	gene	ID=gene-CD630_14190	ID=gene-CD630_14190;Name=CD630_14190;gbkey=Gene;gene_biotype=protein_coding;locus_tag=CD630_14190
gene2795	AM180355.1	3205638	3207371	-	gene	ID=gene-CD630_27580	ID=gene-CD630_27580;Name=CD630_27580;gbkey=Gene;gene_biotype=protein_coding;locus_tag=CD630_27580
gene27984	AM180355.1	3439638	3439913	-	gene	ID=gene-CD630_29620	ID=gene-CD630_29620;Name=CD630_29620;gbkey=Gene;gene_biotype=protein_coding;locus_tag=CD630_29620
gene2809	AM180355.1	1919166	1920896	+	gene	ID=gene-CD630_16550	ID=gene-CD630_16550;Name=CD630_16550;gbkey=Gene;gene_biotype=protein_coding;locus_tag=CD630_16550
gene28108	AM180355.1	4084423	4084665	-	gene	ID=gene-CD630_34950	ID=gene-CD630_34950;Name=CD630_34950;gbkey=Gene;gene_biotype=protein_coding;locus_tag=CD630_34950
gene28120	AM180355.1	2238302	2238580	+	gene	ID=gene-CD630_19401	ID=gene-CD630_19401;Name=CD630_19401;gbkey=Gene;gene_biotype=protein_coding;locus_tag=CD630_19401
gene28121	AM180355.1	4084737	4085015	-	gene	ID=gene-CD630_34960	ID=gene-CD630_34960;Name=hupA;gbkey=Gene;gene=hupA;gene_biotype=protein_coding;locus_tag=CD630_34960
gene28122	AM180355.1	4109360	4109638	-	gene	ID=gene-CD630_35160	ID=gene-CD630_35160;Name=spoVG;gbkey=Gene;gene=spoVG;gene_biotype=protein_coding;locus_tag=CD630_35160
gene28123	AM180355.1	4274033	4274311	-	gene	ID=gene-CD630_36630	ID=gene-CD630_36630;Name=rpsF;gbkey=Gene;gene=rpsF;gene_biotype=protein_coding;locus_tag=CD630_36630
gene2815	AM180355.1	2370041	2371741	-	gene	ID=gene-CD630_20560	ID=gene-CD630_20560;Name=CD630_20560;gbkey=Gene;gene_biotype=protein_coding;locus_tag=CD630_20560
gene2820	AM180355.1	3288791	3290518	-	gene	ID=gene-CD630_28180	ID=gene-CD630_28180;Name=CD630_28180;gbkey=Gene;gene_biotype=protein_coding;locus_tag=CD630_28180
gene28225	AM180355.1	749490	749765	+	gene	ID=gene-CD630_06270	ID=gene-CD630_06270;Name=CD630_06270;gbkey=Gene;gene_biotype=protein_coding;locus_tag=CD630_06270
gene28226	AM180355.1	1275430	1275705	+	gene	ID=gene-CD630_10830	ID=gene-CD630_10830;Name=CD630_10830;gbkey=Gene;gene_biotype=protein_coding;locus_tag=CD630_10830
gene28227	AM180355.1	1517919	1518200	+	gene	ID=gene-CD630_13071	ID=gene-CD630_13071;Name=CD630_13071;gbkey=Gene;gene_biotype=protein_coding;locus_tag=CD630_13071
gene28228	AM180355.1	3358626	3358901	+	gene	ID=gene-CD630_28710	ID=gene-CD630_28710;Name=uxaA';gbkey=Gene;gene=uxaA';gene_biotype=protein_coding;locus_tag=CD630_28710
gene283	AM180355.1	1224399	1227866	+	gene	ID=gene-CD630_10400	ID=gene-CD630_10400;Name=addB;gbkey=Gene;gene=addB;gene_biotype=protein_coding;locus_tag=CD630_10400
gene28334	AM180355.1	1457499	1457771	+	gene	ID=gene-CD630_12530	ID=gene-CD630_12530;Name=rpsP;gbkey=Gene;gene=rpsP;gene_biotype=protein_coding;locus_tag=CD630_12530
gene28335	AM180355.1	2222164	2222436	+	gene	ID=gene-CD630_19220	ID=gene-CD630_19220;Name=eutN;gbkey=Gene;gene=eutN;gene_biotype=protein_coding;locus_tag=CD630_19220
gene28417	AM180355.1	2768517	2768726	+	gene	ID=gene-CD630_23990	ID=gene-CD630_23990;Name=CD630_23990;gbkey=Gene;gene_biotype=protein_coding;locus_tag=CD630_23990
gene2844	AM180355.1	3592313	3593980	+	gene	ID=gene-CD630_30910	ID=gene-CD630_30910;Name=treA;gbkey=Gene;gene=treA;gene_biotype=protein_coding;locus_tag=CD630_30910
gene28442	AM180355.1	1322622	1322843	+	gene	ID=gene-CD630_11241	ID=gene-CD630_11241;Name=CD630_11241;gbkey=Gene;gene_biotype=protein_coding;locus_tag=CD630_11241
gene28448	AM180355.1	805897	806166	-	gene	ID=gene-CD630_06642	ID=gene-CD630_06642;Name=CD630_06642;gbkey=Gene;gene_biotype=protein_coding;locus_tag=CD630_06642
gene28449	AM180355.1	3034885	3035154	-	gene	ID=gene-CD630_26270	ID=gene-CD630_26270;Name=CD630_26270;gbkey=Gene;gene_biotype=protein_coding;locus_tag=CD630_26270
gene2845	AM180355.1	3377100	3378818	-	gene	ID=gene-CD630_28880	ID=gene-CD630_28880;Name=CD630_28880;gbkey=Gene;gene_biotype=protein_coding;locus_tag=CD630_28880
gene28565	AM180355.1	2768726	2768992	+	gene	ID=gene-CD630_24000	ID=gene-CD630_24000;Name=cotJB2;gbkey=Gene;gene=cotJB2;gene_biotype=protein_coding;locus_tag=CD630_24000
gene28566	AM180355.1	2993904	2994170	-	gene	ID=gene-CD630_25871	ID=gene-CD630_25871;Name=rpoZ;gbkey=Gene;gene=rpoZ;gene_biotype=protein_coding;locus_tag=CD630_25871
gene28568	AM180355.1	4169426	4169692	-	gene	ID=gene-CD630_35680	ID=gene-CD630_35680;Name=CD630_35680;gbkey=Gene;gene_biotype=protein_coding;locus_tag=CD630_35680
gene28620	AM180355.1	1388905	1389153	+	gene	ID=gene-CD630_11870	ID=gene-CD630_11870;Name=CD630_11870;gbkey=Gene;gene_biotype=protein_coding;locus_tag=CD630_11870
gene2865	AM180355.1	1330380	1332095	+	gene	ID=gene-CD630_11310	ID=gene-CD630_11310;Name=CD630_11310;gbkey=Gene;gene_biotype=protein_coding;locus_tag=CD630_11310
gene28678	AM180355.1	357416	357679	+	gene	ID=gene-CD630_02960	ID=gene-CD630_02960;Name=CD630_02960;gbkey=Gene;gene_biotype=protein_coding;locus_tag=CD630_02960
gene28680	AM180355.1	721050	721313	+	gene	ID=gene-CD630_05970	ID=gene-CD630_05970;Name=cotF;gbkey=Gene;gene=cotF;gene_biotype=protein_coding;locus_tag=CD630_05970
gene28681	AM180355.1	1175631	1175894	+	gene	ID=gene-CD630_10070	ID=gene-CD630_10070;Name=CD630_10070;gbkey=Gene;gene_biotype=protein_coding;locus_tag=CD630_10070
gene28682	AM180355.1	2076222	2076485	+	gene	ID=gene-CD630_17950	ID=gene-CD630_17950;Name=CD630_17950;gbkey=Gene;gene_biotype=protein_coding;locus_tag=CD630_17950
gene28683	AM180355.1	2379515	2379787	+	gene	ID=gene-CD630_20640	ID=gene-CD630_20640;Name=CD630_20640;gbkey=Gene;gene_biotype=protein_coding;locus_tag=CD630_20640
gene28684	AM180355.1	3049425	3049688	-	gene	ID=gene-CD630_26410	ID=gene-CD630_26410;Name=CD630_26410;gbkey=Gene;gene_biotype=protein_coding;locus_tag=CD630_26410
gene28685	AM180355.1	4276023	4276286	-	gene	ID=gene-CD630_36660	ID=gene-CD630_36660;Name=CD630_36660;gbkey=Gene;gene_biotype=protein_coding;locus_tag=CD630_36660
gene28756	AM180355.1	419063	419314	-	gene	ID=gene-CD630_03420	ID=gene-CD630_03420;Name=CD630_03420;gbkey=Gene;gene_biotype=protein_coding;locus_tag=CD630_03420
gene28805	AM180355.1	8857	9117	+	gene	ID=gene-CD630_00080	ID=gene-CD630_00080;Name=CD630_00080;gbkey=Gene;gene_biotype=protein_coding;locus_tag=CD630_00080
gene28806	AM180355.1	171418	171678	+	gene	ID=gene-CD630_01260	ID=gene-CD630_01260;Name=spoIIID;gbkey=Gene;gene=spoIIID;gene_biotype=protein_coding;locus_tag=CD630_01260
gene28807	AM180355.1	960170	960430	-	gene	ID=gene-CD630_07870	ID=gene-CD630_07870;Name=CD630_07870;gbkey=Gene;gene_biotype=protein_coding;locus_tag=CD630_07870
gene28809	AM180355.1	2233199	2233459	-	gene	ID=gene-CD630_19350	ID=gene-CD630_19350;Name=spoVS;gbkey=Gene;gene=spoVS;gene_biotype=protein_coding;locus_tag=CD630_19350
gene28810	AM180355.1	3203742	3204002	-	gene	ID=gene-CD630_27560	ID=gene-CD630_27560;Name=ptsH;gbkey=Gene;gene=ptsH;gene_biotype=protein_coding;locus_tag=CD630_27560
gene28811	AM180355.1	4058644	4058904	-	gene	ID=gene-CD630_34670	ID=gene-CD630_34670;Name=atpC1;gbkey=Gene;gene=atpC1;gene_biotype=protein_coding;locus_tag=CD630_34670
gene28812	AM180355.1	4063901	4064161	-	gene	ID=gene-CD630_34730	ID=gene-CD630_34730;Name=atpC2;gbkey=Gene;gene=atpC2;gene_biotype=protein_coding;locus_tag=CD630_34730
gene2884	AM180355.1	3201676	3203388	-	gene	ID=gene-CD630_27550	ID=gene-CD630_27550;Name=ptsI;gbkey=Gene;gene=ptsI;gene_biotype=protein_coding;locus_tag=CD630_27550
gene2885	AM180355.1	4100368	4102080	-	gene	ID=gene-CD630_35100	ID=gene-CD630_35100;Name=CD630_35100;gbkey=Gene;gene_biotype=protein_coding;locus_tag=CD630_35100
gene2892	AM180355.1	3230834	3232540	-	gene	ID=gene-CD630_27800	ID=gene-CD630_27800;Name=pgmA;gbkey=Gene;gene=pgmA;gene_biotype=protein_coding;locus_tag=CD630_27800
gene28959	AM180355.1	204752	205009	+	gene	ID=gene-CD630_01540	ID=gene-CD630_01540;Name=CD630_01540;gbkey=Gene;gene_biotype=protein_coding;locus_tag=CD630_01540
gene28960	AM180355.1	565827	566084	-	gene	ID=gene-CD630_04760	ID=gene-CD630_04760;Name=CD630_04760;gbkey=Gene;gene_biotype=protein_coding;locus_tag=CD630_04760
gene28961	AM180355.1	745084	745341	+	gene	ID=gene-CD630_06240	ID=gene-CD630_06240;Name=CD630_06240;gbkey=Gene;gene_biotype=protein_coding;locus_tag=CD630_06240
gene28964	AM180355.1	1491445	1491702	+	gene	ID=gene-CD630_12830	ID=gene-CD630_12830;Name=CD630_12830;gbkey=Gene;gene_biotype=protein_coding;locus_tag=CD630_12830
gene28965	AM180355.1	1525816	1526073	+	gene	ID=gene-CD630_13160	ID=gene-CD630_13160;Name=rpsO;gbkey=Gene;gene=rpsO;gene_biotype=protein_coding;locus_tag=CD630_13160
gene28967	AM180355.1	3029497	3029754	-	gene	ID=gene-CD630_26210	ID=gene-CD630_26210;Name=CD630_26210;gbkey=Gene;gene_biotype=protein_coding;locus_tag=CD630_26210
gene2914	AM180355.1	642036	643739	+	gene	ID=gene-CD630_05380	ID=gene-CD630_05380;Name=CD630_05380;gbkey=Gene;gene_biotype=protein_coding;locus_tag=CD630_05380
gene29152	AM180355.1	2000187	2000456	+	gene	ID=gene-CD630_17270	ID=gene-CD630_17270;Name=CD630_17270;gbkey=Gene;gene_biotype=protein_coding;locus_tag=CD630_17270
gene29153	AM180355.1	4084107	4084361	-	gene	ID=gene-CD630_34940	ID=gene-CD630_34940;Name=CD630_34940;gbkey=Gene;gene_biotype=protein_coding;locus_tag=CD630_34940
gene29187	AM180355.1	3768878	3769132	-	gene	ID=gene-CD630_32201	ID=gene-CD630_32201;Name=CD630_32201;gbkey=Gene;gene_biotype=protein_coding;locus_tag=CD630_32201
gene292	AM180355.1	2130969	2134406	+	gene	ID=gene-CD630_18410	ID=gene-CD630_18410;Name=CD630_18410;gbkey=Gene;gene_biotype=protein_coding;locus_tag=CD630_18410
gene29257	AM180355.1	2491975	2492226	+	gene	ID=gene-CD630_21530	ID=gene-CD630_21530;Name=CD630_21530;gbkey=Gene;gene_biotype=protein_coding;locus_tag=CD630_21530
gene29258	AM180355.1	3758515	3758766	-	gene	ID=gene-CD630_32130	ID=gene-CD630_32130;Name=CD630_32130;gbkey=Gene;gene_biotype=protein_coding;locus_tag=CD630_32130
gene29259	AM180355.1	4288752	4288937	-	gene	ID=gene-CD630_36781	ID=gene-CD630_36781;Name=CD630_36781;gbkey=Gene;gene_biotype=protein_coding;locus_tag=CD630_36781
gene2927	AM180355.1	868299	869999	+	gene	ID=gene-CD630_07110	ID=gene-CD630_07110;Name=argS;gbkey=Gene;gene=argS;gene_biotype=protein_coding;locus_tag=CD630_07110
gene2928	AM180355.1	1275960	1277660	+	gene	ID=gene-CD630_10840	ID=gene-CD630_10840;Name=CD630_10840;gbkey=Gene;gene_biotype=protein_coding;locus_tag=CD630_10840
gene29286	AM180355.1	3792695	3793420	-	gene	ID=gene-CD630_32410	ID=gene-CD630_32410;Name=prdB;gbkey=Gene;gene=prdB;gene_biotype=protein_coding;locus_tag=CD630_32410
gene29346	AM180355.1	805434	805679	+	gene	ID=gene-CD630_06641	ID=gene-CD630_06641;Name=CD630_06641;gbkey=Gene;gene_biotype=protein_coding;locus_tag=CD630_06641
gene29387	AM180355.1	1469972	1470220	+	gene	ID=gene-CD630_12640	ID=gene-CD630_12640;Name=CD630_12640;gbkey=Gene;gene_biotype=protein_coding;locus_tag=CD630_12640
gene2943	AM180355.1	2104806	2106284	+	gene	ID=gene-CD630_18200	ID=gene-CD630_18200;Name=ade;gbkey=Gene;gene=ade;gene_biotype=protein_coding;is_ordered=true;locus_tag=CD630_18200;part=2/2
gene29460	AM180355.1	2780880	2781149	-	gene	ID=gene-CD630_24090	ID=gene-CD630_24090;Name=CD630_24090;gbkey=Gene;gene_biotype=protein_coding;locus_tag=CD630_24090
gene29502	AM180355.1	1531845	1532090	+	gene	ID=gene-CD630_13210	ID=gene-CD630_13210;Name=CD630_13210;gbkey=Gene;gene_biotype=protein_coding;locus_tag=CD630_13210
gene29503	AM180355.1	2075878	2076123	+	gene	ID=gene-CD630_17940	ID=gene-CD630_17940;Name=CD630_17940;gbkey=Gene;gene_biotype=protein_coding;locus_tag=CD630_17940
gene29504	AM180355.1	3806257	3806502	+	gene	ID=gene-CD630_32520	ID=gene-CD630_32520;Name=CD630_32520;gbkey=Gene;gene_biotype=protein_coding;locus_tag=CD630_32520
gene29516	AM180355.1	1760589	1760816	-	gene	ID=gene-CD630_15180	ID=gene-CD630_15180;Name=feoA2;gbkey=Gene;gene=feoA2;gene_biotype=protein_coding;locus_tag=CD630_15180
gene29618	AM180355.1	2447237	2447476	-	gene	ID=gene-CD630_21152	ID=gene-CD630_21152;Name=CD630_21152;gbkey=Gene;gene_biotype=protein_coding;locus_tag=CD630_21152
gene2964	AM180355.1	2726106	2727800	-	gene	ID=gene-CD630_23580	ID=gene-CD630_23580;Name=CD630_23580;gbkey=Gene;gene_biotype=protein_coding;locus_tag=CD630_23580
gene2965	AM180355.1	1812516	1814210	+	gene	ID=gene-CD630_15660	ID=gene-CD630_15660;Name=ilvB;gbkey=Gene;gene=ilvB;gene_biotype=protein_coding;locus_tag=CD630_15660
gene29738	AM180355.1	1810931	1811170	+	gene	ID=gene-CD630_15640	ID=gene-CD630_15640;Name=CD630_15640;gbkey=Gene;gene_biotype=protein_coding;locus_tag=CD630_15640
gene29742	AM180355.1	743235	743465	-	gene	ID=gene-CD630_06200	ID=gene-CD630_06200;Name=CD630_06200;gbkey=Gene;gene_biotype=protein_coding;locus_tag=CD630_06200
gene29878	AM180355.1	2547692	2547928	-	gene	ID=gene-CD630_21991	ID=gene-CD630_21991;Name=CD630_21991;gbkey=Gene;gene_biotype=protein_coding;locus_tag=CD630_21991
gene29879	AM180355.1	2819362	2819604	-	gene	ID=gene-CD630_24430	ID=gene-CD630_24430;Name=CD630_24430;gbkey=Gene;gene_biotype=protein_coding;locus_tag=CD630_24430
gene30003	AM180355.1	2030779	2031012	-	gene	ID=gene-CD630_17511	ID=gene-CD630_17511;Name=CD630_17511;gbkey=Gene;gene_biotype=protein_coding;locus_tag=CD630_17511
gene30007	AM180355.1	2720249	2721559	-	gene	ID=gene-CD630_23510	ID=gene-CD630_23510;Name=grdB;gbkey=Gene;gene=grdB;gene_biotype=protein_coding;locus_tag=CD630_23510
gene301	AM180355.1	262205	265633	-	gene	ID=gene-CD630_02030	ID=gene-CD630_02030;Name=CD630_02030;gbkey=Gene;gene_biotype=protein_coding;locus_tag=CD630_02030
gene30119	AM180355.1	751318	751548	+	gene	ID=gene-CD630_06271	ID=gene-CD630_06271;Name=CD630_06271;gbkey=Gene;gene_biotype=protein_coding;locus_tag=CD630_06271
gene30121	AM180355.1	2017332	2018639	+	pseudogene	ID=gene-CD630_17410	ID=gene-CD630_17410;Name=CD630_17410;gbkey=Gene;gene_biotype=pseudogene;locus_tag=CD630_17410;pseudo=true;pseudogene=unknown
gene30124	AM180355.1	3333632	3333862	-	gene	ID=gene-CD630_28510	ID=gene-CD630_28510;Name=dltC;gbkey=Gene;gene=dltC;gene_biotype=protein_coding;locus_tag=CD630_28510
gene30125	AM180355.1	3751263	3751493	-	pseudogene	ID=NA	ID=NA;Name=NA;gbkey=Gene;gene=NA;gene_biotype=protein_coding;locus_tag=NA
gene30126	AM180355.1	4174048	4174278	-	gene	ID=gene-CD630_35740	ID=gene-CD630_35740;Name=CD630_35740;gbkey=Gene;gene_biotype=protein_coding;locus_tag=CD630_35740
gene30216	AM180355.1	2022187	2022411	-	gene	ID=gene-CD630_17451	ID=gene-CD630_17451;Name=feoA3;gbkey=Gene;gene=feoA3;gene_biotype=protein_coding;locus_tag=CD630_17451
gene30292	AM180355.1	1255207	1255434	-	gene	ID=gene-CD630_10620	ID=gene-CD630_10620;Name=acpP;gbkey=Gene;gene=acpP;gene_biotype=protein_coding;locus_tag=CD630_10620
gene30293	AM180355.1	1457836	1458063	+	gene	ID=gene-CD630_12540	ID=gene-CD630_12540;Name=CD630_12540;gbkey=Gene;gene_biotype=protein_coding;locus_tag=CD630_12540
gene30295	AM180355.1	4065328	4065555	-	gene	ID=gene-CD630_34760	ID=gene-CD630_34760;Name=atpZ;gbkey=Gene;gene=atpZ;gene_biotype=protein_coding;locus_tag=CD630_34760
gene30297	AM180355.1	4273316	4273543	-	gene	ID=gene-CD630_36611	ID=gene-CD630_36611;Name=rpsR;gbkey=Gene;gene=rpsR;gene_biotype=protein_coding;locus_tag=CD630_36611
gene3035	AM180355.1	1407392	1409071	+	gene	ID=gene-CD630_12090	ID=gene-CD630_12090;Name=recN;gbkey=Gene;gene=recN;gene_biotype=protein_coding;locus_tag=CD630_12090
gene3036	AM180355.1	3882086	3884230	-	gene	ID=gene-CD630_33170	ID=gene-CD630_33170;Name=fdhF;gbkey=Gene;gene=fdhF;gene_biotype=protein_coding;locus_tag=CD630_33170
gene30406	AM180355.1	1026632	1026856	+	gene	ID=gene-CD630_08500	ID=gene-CD630_08500;Name=CD630_08500;gbkey=Gene;gene_biotype=protein_coding;locus_tag=CD630_08500
gene30407	AM180355.1	1383091	1383315	+	gene	ID=gene-CD630_11830	ID=gene-CD630_11830;Name=acpP1;gbkey=Gene;gene=acpP1;gene_biotype=protein_coding;locus_tag=CD630_11830
gene30408	AM180355.1	2461390	2461614	-	gene	ID=gene-CD630_21251	ID=gene-CD630_21251;Name=CD630_21251;gbkey=Gene;gene_biotype=protein_coding;locus_tag=CD630_21251
gene30409	AM180355.1	2731997	2732221	-	gene	ID=gene-CD630_23640	ID=gene-CD630_23640;Name=CD630_23640;gbkey=Gene;gene_biotype=protein_coding;locus_tag=CD630_23640
gene30410	AM180355.1	3702715	3702939	-	gene	ID=gene-CD630_31691	ID=gene-CD630_31691;Name=secG;gbkey=Gene;gene=secG;gene_biotype=protein_coding;locus_tag=CD630_31691
gene30431	AM180355.1	23269	23490	+	gene	ID=gene-CD630_00181	ID=gene-CD630_00181;Name=CD630_00181;gbkey=Gene;gene_biotype=protein_coding;locus_tag=CD630_00181
gene3048	AM180355.1	879545	881221	+	gene	ID=gene-CD630_07180	ID=gene-CD630_07180;Name=fhs;gbkey=Gene;gene=fhs;gene_biotype=protein_coding;locus_tag=CD630_07180
gene3049	AM180355.1	1496690	1498366	+	gene	ID=gene-CD630_12890	ID=gene-CD630_12890;Name=CD630_12890;gbkey=Gene;gene_biotype=protein_coding;locus_tag=CD630_12890
gene3050	AM180355.1	1844994	1846688	+	gene	ID=gene-CD630_15910	ID=gene-CD630_15910;Name=kdpA;gbkey=Gene;gene=kdpA;gene_biotype=protein_coding;locus_tag=CD630_15910
gene30548	AM180355.1	720829	721050	+	gene	ID=gene-CD630_05960	ID=gene-CD630_05960;Name=CD630_05960;gbkey=Gene;gene_biotype=protein_coding;locus_tag=CD630_05960
gene30549	AM180355.1	744283	744504	-	gene	ID=gene-CD630_06220	ID=gene-CD630_06220;Name=CD630_06220;gbkey=Gene;gene_biotype=protein_coding;locus_tag=CD630_06220
gene30550	AM180355.1	1714501	1714722	+	gene	ID=gene-CD630_14780	ID=gene-CD630_14780;Name=feoA1;gbkey=Gene;gene=feoA1;gene_biotype=protein_coding;locus_tag=CD630_14780
gene30551	AM180355.1	3107368	3107589	-	gene	ID=gene-CD630_26880	ID=gene-CD630_26880;Name=sspA;gbkey=Gene;gene=sspA;gene_biotype=protein_coding;locus_tag=CD630_26880
gene30648	AM180355.1	1575670	1575867	+	gene	ID=gene-CD630_13601	ID=gene-CD630_13601;Name=CD630_13601;gbkey=Gene;gene_biotype=protein_coding;locus_tag=CD630_13601
gene30721	AM180355.1	3831640	3831858	+	gene	ID=gene-CD630_32730	ID=gene-CD630_32730;Name=feoA4;gbkey=Gene;gene=feoA4;gene_biotype=protein_coding;locus_tag=CD630_32730
gene3073	AM180355.1	3188836	3190500	-	gene	ID=gene-CD630_27470	ID=gene-CD630_27470;Name=CD630_27470;gbkey=Gene;gene_biotype=protein_coding;locus_tag=CD630_27470
gene30740	AM180355.1	764078	764296	+	gene	ID=gene-CD630_06420	ID=gene-CD630_06420;Name=CD630_06420;gbkey=Gene;gene_biotype=protein_coding;locus_tag=CD630_06420
gene3080	AM180355.1	1427651	1429315	+	gene	ID=gene-CD630_12290	ID=gene-CD630_12290;Name=CD630_12290;gbkey=Gene;gene_biotype=protein_coding;locus_tag=CD630_12290
gene30833	AM180355.1	158967	159182	+	gene	ID=gene-CD630_01150	ID=gene-CD630_01150;Name=CD630_01150;gbkey=Gene;gene_biotype=protein_coding;locus_tag=CD630_01150
gene30834	AM180355.1	278285	278500	-	gene	ID=gene-CD630_02140	ID=gene-CD630_02140;Name=CD630_02140;gbkey=Gene;gene_biotype=protein_coding;locus_tag=CD630_02140
gene30836	AM180355.1	1402956	1403171	+	gene	ID=gene-CD630_12040	ID=gene-CD630_12040;Name=xseB;gbkey=Gene;gene=xseB;gene_biotype=protein_coding;locus_tag=CD630_12040
gene3092	AM180355.1	662767	664434	+	gene	ID=gene-CD630_05570	ID=gene-CD630_05570;Name=CD630_05570;gbkey=Gene;gene_biotype=protein_coding;locus_tag=CD630_05570
gene30925	AM180355.1	1595319	1595528	+	gene	ID=gene-CD630_13781	ID=gene-CD630_13781;Name=CD630_13781;gbkey=Gene;gene_biotype=protein_coding;locus_tag=CD630_13781
gene30991	AM180355.1	1332168	1332380	+	gene	ID=gene-CD630_11320	ID=gene-CD630_11320;Name=CD630_11320;gbkey=Gene;gene_biotype=protein_coding;locus_tag=CD630_11320
gene30992	AM180355.1	1714276	1714488	+	gene	ID=gene-CD630_14770	ID=gene-CD630_14770;Name=feoA;gbkey=Gene;gene=feoA;gene_biotype=protein_coding;locus_tag=CD630_14770
gene3103	AM180355.1	2373865	2375529	+	gene	ID=gene-CD630_20590	ID=gene-CD630_20590;Name=glnS;gbkey=Gene;gene=glnS;gene_biotype=protein_coding;locus_tag=CD630_20590
gene31062	AM180355.1	843193	843387	+	gene	ID=gene-CD630_06941	ID=gene-CD630_06941;Name=CD630_06941;gbkey=Gene;gene_biotype=protein_coding;locus_tag=CD630_06941
gene31118	AM180355.1	1265333	1265542	+	gene	ID=gene-CD630_10710	ID=gene-CD630_10710;Name=CD630_10710;gbkey=Gene;gene_biotype=protein_coding;locus_tag=CD630_10710
gene31119	AM180355.1	1595548	1595769	+	gene	ID=gene-CD630_13782	ID=gene-CD630_13782;Name=CD630_13782;gbkey=Gene;gene_biotype=protein_coding;locus_tag=CD630_13782
gene31120	AM180355.1	1793208	1793417	+	gene	ID=gene-CD630_15431	ID=gene-CD630_15431;Name=CD630_15431;gbkey=Gene;gene_biotype=protein_coding;locus_tag=CD630_15431
gene3117	AM180355.1	3734513	3736165	+	gene	ID=gene-CD630_31920	ID=gene-CD630_31920;Name=cwp21;gbkey=Gene;gene=cwp21;gene_biotype=protein_coding;locus_tag=CD630_31920
gene31264	AM180355.1	2805	3011	+	gene	ID=gene-CD630_00030	ID=gene-CD630_00030;Name=CD630_00030;gbkey=Gene;gene_biotype=protein_coding;locus_tag=CD630_00030
gene31265	AM180355.1	341076	341282	+	gene	ID=gene-CD630_02791	ID=gene-CD630_02791;Name=CD630_02791;gbkey=Gene;gene_biotype=protein_coding;locus_tag=CD630_02791
gene31266	AM180355.1	871181	871387	-	gene	ID=gene-CD630_07121	ID=gene-CD630_07121;Name=CD630_07121;gbkey=Gene;gene_biotype=protein_coding;locus_tag=CD630_07121
gene31267	AM180355.1	1256079	1256285	+	gene	ID=gene-CD630_10631	ID=gene-CD630_10631;Name=CD630_10631;gbkey=Gene;gene_biotype=protein_coding;locus_tag=CD630_10631
gene3136	AM180355.1	3608221	3609873	-	gene	ID=gene-CD630_31010	ID=gene-CD630_31010;Name=CD630_31010;gbkey=Gene;gene_biotype=protein_coding;locus_tag=CD630_31010
gene31374	AM180355.1	1256680	1256880	+	gene	ID=gene-CD630_10633	ID=gene-CD630_10633;Name=CD630_10633;gbkey=Gene;gene_biotype=protein_coding;locus_tag=CD630_10633
gene3139	AM180355.1	2323504	2325159	-	gene	ID=gene-CD630_20140	ID=gene-CD630_20140;Name=ilvD;gbkey=Gene;gene=ilvD;gene_biotype=protein_coding;locus_tag=CD630_20140
gene31408	AM180355.1	2468154	2468357	-	gene	ID=gene-CD630_21320	ID=gene-CD630_21320;Name=CD630_21320;gbkey=Gene;gene_biotype=protein_coding;locus_tag=CD630_21320
gene31409	AM180355.1	2473552	2473755	-	gene	ID=gene-CD630_21361	ID=gene-CD630_21361;Name=CD630_21361;gbkey=Gene;gene_biotype=protein_coding;locus_tag=CD630_21361
gene31410	AM180355.1	3804309	3804512	+	gene	ID=gene-CD630_32490	ID=gene-CD630_32490;Name=sspB;gbkey=Gene;gene=sspB;gene_biotype=protein_coding;locus_tag=CD630_32490
gene31411	AM180355.1	3830686	3830901	-	gene	ID=gene-CD630_32710	ID=gene-CD630_32710;Name=CD630_32710;gbkey=Gene;gene_biotype=protein_coding;locus_tag=CD630_32710
gene3153	AM180355.1	3342424	3344025	-	gene	ID=gene-CD630_28590	ID=gene-CD630_28590;Name=CD630_28590;gbkey=Gene;gene_biotype=protein_coding;locus_tag=CD630_28590
gene31571	AM180355.1	354153	354353	+	gene	ID=gene-CD630_02921	ID=gene-CD630_02921;Name=CD630_02921;gbkey=Gene;gene_biotype=protein_coding;locus_tag=CD630_02921
gene31573	AM180355.1	1073975	1074175	-	gene	ID=gene-CD630_08920	ID=gene-CD630_08920;Name=cspA;gbkey=Gene;gene=cspA;gene_biotype=protein_coding;locus_tag=CD630_08920
gene31575	AM180355.1	1498573	1498773	+	gene	ID=gene-CD630_12900	ID=gene-CD630_12900;Name=CD630_12900;gbkey=Gene;gene_biotype=protein_coding;locus_tag=CD630_12900
gene31576	AM180355.1	1571945	1572145	+	gene	ID=gene-CD630_13550	ID=gene-CD630_13550;Name=cspB;gbkey=Gene;gene=cspB;gene_biotype=protein_coding;locus_tag=CD630_13550
gene31577	AM180355.1	2671428	2671628	+	gene	ID=gene-CD630_23080	ID=gene-CD630_23080;Name=CD630_23080;gbkey=Gene;gene_biotype=protein_coding;locus_tag=CD630_23080
gene31578	AM180355.1	3043993	3044193	-	gene	ID=gene-CD630_26340	ID=gene-CD630_26340;Name=CD630_26340;gbkey=Gene;gene_biotype=protein_coding;locus_tag=CD630_26340
gene31579	AM180355.1	3448377	3448577	+	gene	ID=gene-CD630_29661	ID=gene-CD630_29661;Name=CD630_29661;gbkey=Gene;gene_biotype=protein_coding;locus_tag=CD630_29661
gene31580	AM180355.1	4074009	4074209	-	gene	ID=gene-CD630_34861	ID=gene-CD630_34861;Name=rpmE;gbkey=Gene;gene=rpmE;gene_biotype=protein_coding;locus_tag=CD630_34861
gene31581	AM180355.1	4216604	4216804	-	gene	ID=gene-CD630_36090	ID=gene-CD630_36090;Name=CD630_36090;gbkey=Gene;gene_biotype=protein_coding;locus_tag=CD630_36090
gene31583	AM180355.1	2734915	2735115	-	gene	ID=gene-CD630_23680	ID=gene-CD630_23680;Name=CD630_23680;gbkey=Gene;gene_biotype=protein_coding;locus_tag=CD630_23680
gene31732	AM180355.1	1325502	1325699	+	gene	ID=gene-CD630_11261	ID=gene-CD630_11261;Name=CD630_11261;gbkey=Gene;gene_biotype=protein_coding;locus_tag=CD630_11261
gene31733	AM180355.1	1395787	1395984	+	gene	ID=gene-CD630_11940	ID=gene-CD630_11940;Name=spoIIIAC;gbkey=Gene;gene=spoIIIAC;gene_biotype=protein_coding;locus_tag=CD630_11940
gene31734	AM180355.1	2092528	2093730	+	pseudogene	ID=gene-CD630_18090	ID=gene-CD630_18090;Name=CD630_18090;gbkey=Gene;gene_biotype=pseudogene;locus_tag=CD630_18090;pseudo=true;pseudogene=unknown
gene31735	AM180355.1	2804938	2805135	-	gene	ID=gene-CD630_24291	ID=gene-CD630_24291;Name=CD630_24291;gbkey=Gene;gene_biotype=protein_coding;locus_tag=CD630_24291
gene3175	AM180355.1	4074362	4075951	-	gene	ID=gene-CD630_34870	ID=gene-CD630_34870;Name=rho;gbkey=Gene;gene=rho;gene_biotype=protein_coding;locus_tag=CD630_34870
gene31873	AM180355.1	831766	831960	+	gene	ID=gene-CD630_06860	ID=gene-CD630_06860;Name=rpmI;gbkey=Gene;gene=rpmI;gene_biotype=protein_coding;locus_tag=CD630_06860
gene31875	AM180355.1	1977721	1977915	+	gene	ID=gene-CD630_17021	ID=gene-CD630_17021;Name=thiS;gbkey=Gene;gene=thiS;gene_biotype=protein_coding;locus_tag=CD630_17021
gene31876	AM180355.1	2598849	2599043	-	gene	ID=gene-CD630_22451	ID=gene-CD630_22451;Name=CD630_22451;gbkey=Gene;gene_biotype=protein_coding;locus_tag=CD630_22451
gene31878	AM180355.1	4152187	4152468	-	gene	ID=gene-CD630_35512	ID=gene-CD630_35512;Name=CD630_35512;gbkey=Gene;gene_biotype=protein_coding;locus_tag=CD630_35512
gene3196	AM180355.1	2961814	2963457	-	gene	ID=gene-CD630_25610	ID=gene-CD630_25610;Name=CD630_25610;gbkey=Gene;gene_biotype=protein_coding;locus_tag=CD630_25610
gene32007	AM180355.1	2286064	2286240	+	pseudogene	ID=NA	ID=NA	ID=NA;Name=NA;gbkey=Gene;gene_biotype=protein_coding;locus_tag=NA
gene32014	AM180355.1	897554	897745	+	gene	ID=gene-CD630_07340	ID=gene-CD630_07340;Name=CD630_07340;gbkey=Gene;gene_biotype=protein_coding;locus_tag=CD630_07340
gene32015	AM180355.1	1079085	1079276	+	gene	ID=gene-CD630_08960	ID=gene-CD630_08960;Name=CD630_08960;gbkey=Gene;gene_biotype=protein_coding;locus_tag=CD630_08960
gene32016	AM180355.1	2004377	2004568	+	gene	ID=gene-CD630_17292	ID=gene-CD630_17292;Name=CD630_17292;gbkey=Gene;gene_biotype=protein_coding;locus_tag=CD630_17292
gene32017	AM180355.1	2446898	2447089	-	gene	ID=gene-CD630_21151	ID=gene-CD630_21151;Name=CD630_21151;gbkey=Gene;gene_biotype=protein_coding;locus_tag=CD630_21151
gene32019	AM180355.1	4030897	4031088	+	gene	ID=gene-CD630_34391	ID=gene-CD630_34391;Name=CD630_34391;gbkey=Gene;gene_biotype=protein_coding;locus_tag=CD630_34391
gene32020	AM180355.1	4146634	4146825	-	gene	ID=gene-CD630_35511	ID=gene-CD630_35511;Name=CD630_35511;gbkey=Gene;gene_biotype=protein_coding;locus_tag=CD630_35511
gene321	AM180355.1	4090081	4093467	-	gene	ID=gene-CD630_35010	ID=gene-CD630_35010;Name=mfd;gbkey=Gene;gene=mfd;gene_biotype=protein_coding;locus_tag=CD630_35010
gene3213	AM180355.1	20470	22107	+	gene	ID=gene-CD630_00160	ID=gene-CD630_00160;Name=dnaX;gbkey=Gene;gene=dnaX;gene_biotype=protein_coding;locus_tag=CD630_00160
gene32156	AM180355.1	1851337	1851525	+	gene	ID=gene-CD630_15951	ID=gene-CD630_15951;Name=CD630_15951;gbkey=Gene;gene_biotype=protein_coding;locus_tag=CD630_15951
gene32158	AM180355.1	2964187	2964375	+	gene	ID=gene-CD630_25621	ID=gene-CD630_25621;Name=rpmB;gbkey=Gene;gene=rpmB;gene_biotype=protein_coding;locus_tag=CD630_25621
gene32160	AM180355.1	4213120	4213308	-	gene	ID=gene-CD630_36051	ID=gene-CD630_36051;Name=CD630_36051;gbkey=Gene;gene_biotype=protein_coding;locus_tag=CD630_36051
gene3223	AM180355.1	3967487	3968851	-	gene	ID=gene-CD630_33930	ID=gene-CD630_33930;Name=rumA;gbkey=Gene;gene=rumA;gene_biotype=protein_coding;locus_tag=CD630_33930
gene3229	AM180355.1	474977	476608	+	gene	ID=gene-CD630_04020	ID=gene-CD630_04020;Name=CD630_04020;gbkey=Gene;gene_biotype=protein_coding;locus_tag=CD630_04020
gene3230	AM180355.1	2077711	2079342	-	gene	ID=gene-CD630_17970	ID=gene-CD630_17970;Name=CD630_17970;gbkey=Gene;gene_biotype=protein_coding;locus_tag=CD630_17970
gene32324	AM180355.1	4275823	4276008	-	gene	ID=gene-CD630_36650	ID=gene-CD630_36650;Name=CD630_36650;gbkey=Gene;gene_biotype=protein_coding;locus_tag=CD630_36650
gene32336	AM180355.1	1795095	1795271	-	gene	ID=gene-CD630_15461	ID=gene-CD630_15461;Name=CD630_15461;gbkey=Gene;gene_biotype=protein_coding;locus_tag=CD630_15461
gene3243	AM180355.1	252260	253888	+	gene	ID=gene-CD630_01940	ID=gene-CD630_01940;Name=groL;gbkey=Gene;gene=groL;gene_biotype=protein_coding;locus_tag=CD630_01940
gene32441	AM180355.1	1377299	1377475	+	gene	ID=gene-CD630_11761	ID=gene-CD630_11761;Name=rpmF;gbkey=Gene;gene=rpmF;gene_biotype=protein_coding;locus_tag=CD630_11761
gene3245	AM180355.1	2903694	2905322	+	gene	ID=gene-CD630_25150	ID=gene-CD630_25150;Name=CD630_25150;gbkey=Gene;gene_biotype=protein_coding;locus_tag=CD630_25150
gene3246	AM180355.1	3848735	3850363	-	gene	ID=gene-CD630_32860	ID=gene-CD630_32860;Name=CD630_32860;gbkey=Gene;gene_biotype=protein_coding;locus_tag=CD630_32860
gene3254	AM180355.1	2507851	2509443	-	gene	ID=gene-CD630_21680	ID=gene-CD630_21680;Name=hcp;gbkey=Gene;gene=hcp;gene_biotype=protein_coding;locus_tag=CD630_21680
gene3255	AM180355.1	2382937	2384562	-	gene	ID=gene-CD630_20680	ID=gene-CD630_20680;Name=CD630_20680;gbkey=Gene;gene_biotype=protein_coding;locus_tag=CD630_20680
gene3257	AM180355.1	957802	959352	+	gene	ID=gene-CD630_07850	ID=gene-CD630_07850;Name=CD630_07850;gbkey=Gene;gene_biotype=protein_coding;locus_tag=CD630_07850
gene3261	AM180355.1	1778465	1780078	+	gene	ID=gene-CD630_15340	ID=gene-CD630_15340;Name=ggt;gbkey=Gene;gene=ggt;gene_biotype=protein_coding;locus_tag=CD630_15340
gene32627	AM180355.1	1256467	1256646	+	gene	ID=gene-CD630_10632	ID=gene-CD630_10632;Name=CD630_10632;gbkey=Gene;gene_biotype=protein_coding;locus_tag=CD630_10632
gene32629	AM180355.1	2821648	2821827	-	gene	ID=gene-CD630_24461	ID=gene-CD630_24461;Name=rpsU;gbkey=Gene;gene=rpsU;gene_biotype=protein_coding;locus_tag=CD630_24461
gene3265	AM180355.1	932734	934347	+	gene	ID=gene-CD630_07610	ID=gene-CD630_07610;Name=CD630_07610;gbkey=Gene;gene_biotype=protein_coding;locus_tag=CD630_07610
gene32739	AM180355.1	739240	739416	-	gene	ID=gene-CD630_06140	ID=gene-CD630_06140;Name=CD630_06140;gbkey=Gene;gene_biotype=protein_coding;locus_tag=CD630_06140
gene32741	AM180355.1	2208126	2208308	+	gene	ID=gene-CD630_19060	ID=gene-CD630_19060;Name=CD630_19060;gbkey=Gene;gene_biotype=protein_coding;locus_tag=CD630_19060
gene3275	AM180355.1	2001951	2003570	-	gene	ID=gene-CD630_17290	ID=gene-CD630_17290;Name=CD630_17290;gbkey=Gene;gene_biotype=protein_coding;locus_tag=CD630_17290
gene32833	AM180355.1	2460540	2460734	-	gene	ID=gene-CD630_21241	ID=gene-CD630_21241;Name=CD630_21241;gbkey=Gene;gene_biotype=protein_coding;locus_tag=CD630_21241
gene3286	AM180355.1	1183390	1185003	+	gene	ID=gene-CD630_10150	ID=gene-CD630_10150;Name=CD630_10150;gbkey=Gene;gene_biotype=protein_coding;locus_tag=CD630_10150
gene3301	AM180355.1	620661	622268	+	gene	ID=gene-CD630_05200	ID=gene-CD630_05200;Name=CD630_05200;gbkey=Gene;gene_biotype=protein_coding;locus_tag=CD630_05200
gene33016	AM180355.1	228980	229150	-	gene	ID=gene-CD630_01721	ID=gene-CD630_01721;Name=fdxA;gbkey=Gene;gene=fdxA;gene_biotype=protein_coding;locus_tag=CD630_01721
gene33017	AM180355.1	761227	761397	+	gene	ID=gene-CD630_06380	ID=gene-CD630_06380;Name=CD630_06380;gbkey=Gene;gene_biotype=protein_coding;locus_tag=CD630_06380
gene33018	AM180355.1	3107009	3107179	-	gene	ID=gene-CD630_26871	ID=gene-CD630_26871;Name=CD630_26871;gbkey=Gene;gene_biotype=protein_coding;locus_tag=CD630_26871
gene3303	AM180355.1	4086659	4088272	-	gene	ID=gene-CD630_34980	ID=gene-CD630_34980;Name=spoVB;gbkey=Gene;gene=spoVB;gene_biotype=protein_coding;locus_tag=CD630_34980
gene3325	AM180355.1	1476741	1478342	+	gene	ID=gene-CD630_12720	ID=gene-CD630_12720;Name=CD630_12720;gbkey=Gene;gene_biotype=protein_coding;locus_tag=CD630_12720
gene33372	AM180355.1	2429283	2429444	-	gene	ID=gene-CD630_21021	ID=gene-CD630_21021;Name=CD630_21021;gbkey=Gene;gene_biotype=protein_coding;locus_tag=CD630_21021
gene33373	AM180355.1	2488448	2488609	-	gene	ID=gene-CD630_21501	ID=gene-CD630_21501;Name=CD630_21501;gbkey=Gene;gene_biotype=protein_coding;locus_tag=CD630_21501
gene33375	AM180355.1	4171832	4171993	-	gene	ID=gene-CD630_35701	ID=gene-CD630_35701;Name=CD630_35701;gbkey=Gene;gene_biotype=protein_coding;locus_tag=CD630_35701
gene3346	AM180355.1	3322277	3323881	-	gene	ID=gene-CD630_28410	ID=gene-CD630_28410;Name=CD630_28410;gbkey=Gene;gene_biotype=protein_coding;locus_tag=CD630_28410
gene3347	AM180355.1	3850487	3852091	-	gene	ID=gene-CD630_32870	ID=gene-CD630_32870;Name=CD630_32870;gbkey=Gene;gene_biotype=protein_coding;locus_tag=CD630_32870
gene33716	AM180355.1	2964535	2964687	-	gene	ID=gene-CD630_25622	ID=gene-CD630_25622;Name=CD630_25622;gbkey=Gene;gene_biotype=protein_coding;locus_tag=CD630_25622
gene3374	AM180355.1	402133	403731	-	gene	ID=gene-CD630_03330	ID=gene-CD630_03330;Name=ppaC;gbkey=Gene;gene=ppaC;gene_biotype=protein_coding;locus_tag=CD630_03330
gene34010	AM180355.1	3271520	3271663	-	gene	ID=gene-CD630_27991	ID=gene-CD630_27991;Name=CD630_27991;gbkey=Gene;gene_biotype=protein_coding;locus_tag=CD630_27991
gene34110	AM180355.1	1508020	1508160	+	gene	ID=gene-CD630_13011	ID=gene-CD630_13011;Name=CD630_13011;gbkey=Gene;gene_biotype=protein_coding;locus_tag=CD630_13011
gene342	AM180355.1	3842259	3844628	-	gene	ID=gene-CD630_32820	ID=gene-CD630_32820;Name=pflD;gbkey=Gene;gene=pflD;gene_biotype=protein_coding;locus_tag=CD630_32820
gene34214	AM180355.1	4289457	4289594	-	gene	ID=gene-CD630_36800	ID=gene-CD630_36800;Name=rpmH;gbkey=Gene;gene=rpmH;gene_biotype=protein_coding;locus_tag=CD630_36800
gene3423	AM180355.1	1056435	1058015	+	gene	ID=gene-CD630_08790	ID=gene-CD630_08790;Name=CD630_08790;gbkey=Gene;gene_biotype=protein_coding;locus_tag=CD630_08790
gene34309	AM180355.1	1656393	1656527	+	gene	ID=gene-CD630_14281	ID=gene-CD630_14281;Name=CD630_14281;gbkey=Gene;gene_biotype=protein_coding;locus_tag=CD630_14281
gene34310	AM180355.1	2202739	2202873	-	gene	ID=gene-CD630_19000	ID=gene-CD630_19000;Name=CD630_19000;gbkey=Gene;gene_biotype=protein_coding;locus_tag=CD630_19000
gene34311	AM180355.1	2303137	2303271	-	gene	ID=gene-CD630_19942	ID=gene-CD630_19942;Name=CD630_19942;gbkey=Gene;gene_biotype=protein_coding;locus_tag=CD630_19942
gene34312	AM180355.1	2721591	2722064	-	gene	ID=gene-CD630_23520	ID=gene-CD630_23520;Name=grdA;gbkey=Gene;gene=grdA;gene_biotype=protein_coding;locus_tag=CD630_23520
gene3439	AM180355.1	3721968	3723551	-	gene	ID=gene-CD630_31820	ID=gene-CD630_31820;Name=CD630_31820;gbkey=Gene;gene_biotype=protein_coding;locus_tag=CD630_31820
gene3462	AM180355.1	3240044	3241621	-	gene	ID=gene-CD630_27860	ID=gene-CD630_27860;Name=cwp5;gbkey=Gene;gene=cwp5;gene_biotype=protein_coding;locus_tag=CD630_27860
gene34718	AM180355.1	4031129	4031248	-	gene	ID=gene-CD630_34392	ID=gene-CD630_34392;Name=CD630_34392;gbkey=Gene;gene_biotype=protein_coding;locus_tag=CD630_34392
gene34880	AM180355.1	2450710	2450823	-	pseudogene	ID=NA	ID=NA;Name=NA;gbkey=Gene;gene_biotype=protein_coding;locus_tag=NA
gene34881	AM180355.1	4076335	4076448	-	pseudogene	ID=NA	ID=NA;Name=NA;gbkey=Gene;gene_biotype=protein_coding;locus_tag=NA
gene3493	AM180355.1	1030462	1032030	+	gene	ID=gene-CD630_08550	ID=gene-CD630_08550;Name=oppA;gbkey=Gene;gene=oppA;gene_biotype=protein_coding;locus_tag=CD630_08550
gene3506	AM180355.1	3554202	3555767	-	gene	ID=gene-CD630_30610	ID=gene-CD630_30610;Name=CD630_30610;gbkey=Gene;gene_biotype=protein_coding;locus_tag=CD630_30610
gene3520	AM180355.1	3207812	3209359	-	gene	ID=gene-CD630_27600	ID=gene-CD630_27600;Name=CD630_27600;gbkey=Gene;gene_biotype=protein_coding;locus_tag=CD630_27600
gene35222	AM180355.1	1844769	1844864	+	pseudogene	ID=NA	ID=NA;Name=NA;gbkey=Gene;gene_biotype=protein_coding;locus_tag=NA
gene3523	AM180355.1	1541132	1542673	+	gene	ID=gene-CD630_13290	ID=gene-CD630_13290;Name=CD630_13290;gbkey=Gene;gene_biotype=protein_coding;locus_tag=CD630_13290
gene3524	AM180355.1	1899165	1900727	+	gene	ID=gene-CD630_16380	ID=gene-CD630_16380;Name=CD630_16380;gbkey=Gene;gene_biotype=protein_coding;locus_tag=CD630_16380
gene3526	AM180355.1	1871735	1873279	+	gene	ID=gene-CD630_16160	ID=gene-CD630_16160;Name=CD630_16160;gbkey=Gene;gene_biotype=protein_coding;locus_tag=CD630_16160
gene3532	AM180355.1	3232586	3234142	-	gene	ID=gene-CD630_27810	ID=gene-CD630_27810;Name=mviN;gbkey=Gene;gene=mviN;gene_biotype=protein_coding;locus_tag=CD630_27810
gene3535	AM180355.1	3087152	3088711	+	gene	ID=gene-CD630_26720	ID=gene-CD630_26720;Name=appA;gbkey=Gene;gene=appA;gene_biotype=protein_coding;locus_tag=CD630_26720
gene3541	AM180355.1	3007735	3009156	-	gene	ID=gene-CD630_26000	ID=gene-CD630_26000;Name=cstA;gbkey=Gene;gene=cstA;gene_biotype=protein_coding;locus_tag=CD630_26000
gene3545	AM180355.1	3180817	3182376	-	gene	ID=gene-CD630_27410	ID=gene-CD630_27410;Name=hemZ;gbkey=Gene;gene=hemZ;gene_biotype=protein_coding;locus_tag=CD630_27410
gene3565	AM180355.1	2898140	2899690	-	gene	ID=gene-CD630_25100	ID=gene-CD630_25100;Name=CD630_25100;gbkey=Gene;gene_biotype=protein_coding;locus_tag=CD630_25100
gene3567	AM180355.1	4167782	4169332	-	gene	ID=gene-CD630_35670	ID=gene-CD630_35670;Name=sipL;gbkey=Gene;gene=sipL;gene_biotype=protein_coding;locus_tag=CD630_35670
gene3583	AM180355.1	1084489	1086042	+	gene	ID=gene-CD630_09010	ID=gene-CD630_09010;Name=opuCC;gbkey=Gene;gene=opuCC;gene_biotype=protein_coding;locus_tag=CD630_09010
gene3584	AM180355.1	2806465	2808012	+	gene	ID=gene-CD630_24310	ID=gene-CD630_24310;Name=CD630_24310;gbkey=Gene;gene_biotype=protein_coding;locus_tag=CD630_24310
gene3598	AM180355.1	4096751	4098289	-	gene	ID=gene-CD630_35060	ID=gene-CD630_35060;Name=CD630_35060;gbkey=Gene;gene_biotype=protein_coding;locus_tag=CD630_35060
gene3600	AM180355.1	2710750	2712294	-	gene	ID=gene-CD630_23430	ID=gene-CD630_23430;Name=cat1;gbkey=Gene;gene=cat1;gene_biotype=protein_coding;locus_tag=CD630_23430
gene3601	AM180355.1	3560042	3561586	-	gene	ID=gene-CD630_30650	ID=gene-CD630_30650;Name=xylB;gbkey=Gene;gene=xylB;gene_biotype=protein_coding;locus_tag=CD630_30650
gene3602	AM180355.1	3614991	3616535	+	gene	ID=gene-CD630_31070	ID=gene-CD630_31070;Name=CD630_31070;gbkey=Gene;gene_biotype=protein_coding;locus_tag=CD630_31070
gene3603	AM180355.1	1994869	1995981	+	gene	ID=gene-CD630_17180	ID=gene-CD630_17180;Name=CD630_17180;gbkey=Gene;gene_biotype=protein_coding;is_ordered=true;locus_tag=CD630_17180;part=2/2
gene3646	AM180355.1	256539	258074	+	gene	ID=gene-CD630_01980	ID=gene-CD630_01980;Name=guaA;gbkey=Gene;gene=guaA;gene_biotype=protein_coding;locus_tag=CD630_01980
gene3648	AM180355.1	2612813	2614348	-	gene	ID=gene-CD630_22550	ID=gene-CD630_22550;Name=CD630_22550;gbkey=Gene;gene_biotype=protein_coding;locus_tag=CD630_22550
gene3649	AM180355.1	3761079	3762614	-	gene	ID=gene-CD630_32160	ID=gene-CD630_32160;Name=CD630_32160;gbkey=Gene;gene_biotype=protein_coding;locus_tag=CD630_32160
gene366	AM180355.1	2521801	2524989	+	gene	ID=gene-CD630_21800	ID=gene-CD630_21800;Name=CD630_21800;gbkey=Gene;gene_biotype=protein_coding;locus_tag=CD630_21800
gene3667	AM180355.1	2626135	2627661	-	gene	ID=gene-CD630_22660	ID=gene-CD630_22660;Name=CD630_22660;gbkey=Gene;gene_biotype=protein_coding;locus_tag=CD630_22660
gene3672	AM180355.1	285932	287464	+	gene	ID=gene-CD630_02230	ID=gene-CD630_02230;Name=purH;gbkey=Gene;gene=purH;gene_biotype=protein_coding;locus_tag=CD630_02230
gene3673	AM180355.1	2718461	2719993	-	gene	ID=gene-CD630_23490	ID=gene-CD630_23490;Name=grdC;gbkey=Gene;gene=grdC;gene_biotype=protein_coding;locus_tag=CD630_23490
gene3680	AM180355.1	3705412	3706944	-	gene	ID=gene-CD630_31710	ID=gene-CD630_31710;Name=gpmI;gbkey=Gene;gene=gpmI;gene_biotype=protein_coding;locus_tag=CD630_31710
gene3681	AM180355.1	4152690	4154219	-	gene	ID=gene-CD630_35520	ID=gene-CD630_35520;Name=lysS;gbkey=Gene;gene=lysS;gene_biotype=protein_coding;locus_tag=CD630_35520
gene3682	AM180355.1	2739313	2740770	+	gene	ID=gene-CD630_23730	ID=gene-CD630_23730;Name=CD630_23730;gbkey=Gene;gene_biotype=protein_coding;locus_tag=CD630_23730
gene3711	AM180355.1	4025747	4027261	-	gene	ID=gene-CD630_34350	ID=gene-CD630_34350;Name=cobQ;gbkey=Gene;gene=cobQ;gene_biotype=protein_coding;locus_tag=CD630_34350
gene3722	AM180355.1	1600097	1601611	+	gene	ID=gene-CD630_13820	ID=gene-CD630_13820;Name=glpK2;gbkey=Gene;gene=glpK2;gene_biotype=protein_coding;locus_tag=CD630_13820
gene3729	AM180355.1	3335029	3336543	-	gene	ID=gene-CD630_28530	ID=gene-CD630_28530;Name=dltA;gbkey=Gene;gene=dltA;gene_biotype=protein_coding;locus_tag=CD630_28530
gene3749	AM180355.1	362100	363611	+	gene	ID=gene-CD630_03010	ID=gene-CD630_03010;Name=rbsA;gbkey=Gene;gene=rbsA;gene_biotype=protein_coding;locus_tag=CD630_03010
gene3772	AM180355.1	1080111	1081616	+	gene	ID=gene-CD630_08980	ID=gene-CD630_08980;Name=CD630_08980;gbkey=Gene;gene_biotype=protein_coding;locus_tag=CD630_08980
gene3792	AM180355.1	2589899	2591401	-	gene	ID=gene-CD630_22390	ID=gene-CD630_22390;Name=CD630_22390;gbkey=Gene;gene_biotype=protein_coding;locus_tag=CD630_22390
gene3793	AM180355.1	2680455	2681957	-	gene	ID=gene-CD630_23180	ID=gene-CD630_23180;Name=CD630_23180;gbkey=Gene;gene_biotype=protein_coding;locus_tag=CD630_23180
gene3794	AM180355.1	4061220	4062722	-	gene	ID=gene-CD630_34700	ID=gene-CD630_34700;Name=atpA1;gbkey=Gene;gene=atpA1;gene_biotype=protein_coding;locus_tag=CD630_34700
gene3806	AM180355.1	2700697	2702196	+	gene	ID=gene-CD630_23350	ID=gene-CD630_23350;Name=guaB;gbkey=Gene;gene=guaB;gene_biotype=protein_coding;locus_tag=CD630_23350
gene3807	AM180355.1	4011102	4012601	-	gene	ID=gene-CD630_34200	ID=gene-CD630_34200;Name=cobA
gene3817	AM180355.1	1076412	1077908	+	gene	ID=gene-CD630_08940	ID=gene-CD630_08940;Name=CD630_08940;gbkey=Gene;gene_biotype=protein_coding;locus_tag=CD630_08940
gene3819	AM180355.1	2707639	2709135	-	gene	ID=gene-CD630_23410	ID=gene-CD630_23410;Name=abfD;gbkey=Gene;gene=abfD;gene_biotype=protein_coding;locus_tag=CD630_23410
gene385	AM180355.1	3024533	3027640	-	gene	ID=gene-CD630_26180	ID=gene-CD630_26180;Name=ileS;gbkey=Gene;gene=ileS;gene_biotype=protein_coding;locus_tag=CD630_26180
gene3855	AM180355.1	250260	251750	+	gene	ID=gene-CD630_01920	ID=gene-CD630_01920;Name=cls;gbkey=Gene;gene=cls;gene_biotype=protein_coding;locus_tag=CD630_01920
gene3856	AM180355.1	1074642	1076132	+	gene	ID=gene-CD630_08930	ID=gene-CD630_08930;Name=CD630_08930;gbkey=Gene;gene_biotype=protein_coding;locus_tag=CD630_08930
gene3860	AM180355.1	4013526	4015004	-	gene	ID=gene-CD630_34220	ID=gene-CD630_34220;Name=cbiK;gbkey=Gene;gene=cbiK;gene_biotype=protein_coding;locus_tag=CD630_34220
gene3888	AM180355.1	2087647	2089128	+	gene	ID=gene-CD630_18050	ID=gene-CD630_18050;Name=scrB;gbkey=Gene;gene=scrB;gene_biotype=protein_coding;locus_tag=CD630_18050
gene3889	AM180355.1	2129428	2130936	+	gene	ID=gene-CD630_18400	ID=gene-CD630_18400;Name=CD630_18400;gbkey=Gene;gene_biotype=protein_coding;locus_tag=CD630_18400
gene3890	AM180355.1	2451653	2453134	+	gene	ID=gene-CD630_21180	ID=gene-CD630_21180;Name=thrC;gbkey=Gene;gene=thrC;gene_biotype=protein_coding;locus_tag=CD630_21180
gene3891	AM180355.1	3982188	3983669	+	gene	ID=gene-CD630_34040	ID=gene-CD630_34040;Name=cls1;gbkey=Gene;gene=cls1;gene_biotype=protein_coding;locus_tag=CD630_34040
gene3917	AM180355.1	2218012	2219481	+	gene	ID=gene-CD630_19170	ID=gene-CD630_19170;Name=eutE;gbkey=Gene;gene=eutE;gene_biotype=protein_coding;locus_tag=CD630_19170
gene3928	AM180355.1	1070071	1071546	+	gene	ID=gene-CD630_08880	ID=gene-CD630_08880;Name=speA;gbkey=Gene;gene=speA;gene_biotype=protein_coding;locus_tag=CD630_08880
gene3929	AM180355.1	2830132	2831607	-	gene	ID=gene-CD630_24540	ID=gene-CD630_24540;Name=CD630_24540;gbkey=Gene;gene_biotype=protein_coding;locus_tag=CD630_24540
gene3930	AM180355.1	3037582	3039057	-	gene	ID=gene-CD630_26290	ID=gene-CD630_26290;Name=spoIVA;gbkey=Gene;gene=spoIVA;gene_biotype=protein_coding;locus_tag=CD630_26290
gene3953	AM180355.1	1925216	1926673	+	gene	ID=gene-CD630_16580	ID=gene-CD630_16580;Name=gcvPB;gbkey=Gene;gene=gcvPB;gene_biotype=protein_coding;locus_tag=CD630_16580
gene3956	AM180355.1	1666828	1668297	+	gene	ID=gene-CD630_14360	ID=gene-CD630_14360;Name=CD630_14360;gbkey=Gene;gene_biotype=protein_coding;locus_tag=CD630_14360
gene3966	AM180355.1	1892654	1894090	-	gene	ID=gene-CD630_16330	ID=gene-CD630_16330;Name=CD630_16330;gbkey=Gene;gene_biotype=protein_coding;locus_tag=CD630_16330
gene3968	AM180355.1	459275	460741	+	gene	ID=gene-CD630_03890	ID=gene-CD630_03890;Name=bglA;gbkey=Gene;gene=bglA;gene_biotype=protein_coding;locus_tag=CD630_03890
gene3980	AM180355.1	4261503	4262909	-	gene	ID=gene-CD630_36520	ID=gene-CD630_36520;Name=CD630_36520;gbkey=Gene;gene_biotype=protein_coding;locus_tag=CD630_36520
gene3986	AM180355.1	693198	694658	+	gene	ID=gene-CD630_05800	ID=gene-CD630_05800;Name=gapN;gbkey=Gene;gene=gapN;gene_biotype=protein_coding;locus_tag=CD630_05800
gene3993	AM180355.1	910291	911751	+	gene	ID=gene-CD630_07470	ID=gene-CD630_07470;Name=CD630_07470;gbkey=Gene;gene_biotype=protein_coding;locus_tag=CD630_07470
gene4019	AM180355.1	1630685	1632133	-	gene	ID=gene-CD630_14070	ID=gene-CD630_14070;Name=CD630_14070;gbkey=Gene;gene_biotype=protein_coding;locus_tag=CD630_14070
gene4023	AM180355.1	3076612	3078066	-	gene	ID=gene-CD630_26640	ID=gene-CD630_26640;Name=murE;gbkey=Gene;gene=murE;gene_biotype=protein_coding;locus_tag=CD630_26640
gene4024	AM180355.1	3626875	3628329	-	gene	ID=gene-CD630_31150	ID=gene-CD630_31150;Name=bglA4;gbkey=Gene;gene=bglA4;gene_biotype=protein_coding;locus_tag=CD630_31150
gene4032	AM180355.1	4085104	4086552	-	gene	ID=gene-CD630_34970	ID=gene-CD630_34970;Name=CD630_34970;gbkey=Gene;gene_biotype=protein_coding;locus_tag=CD630_34970
gene4034	AM180355.1	863411	864862	-	gene	ID=gene-CD630_07080	ID=gene-CD630_07080;Name=pepD;gbkey=Gene;gene=pepD;gene_biotype=protein_coding;locus_tag=CD630_07080
gene4035	AM180355.1	1505541	1506992	+	gene	ID=gene-CD630_13000	ID=gene-CD630_13000;Name=pepA;gbkey=Gene;gene=pepA;gene_biotype=protein_coding;locus_tag=CD630_13000
gene4036	AM180355.1	1967847	1969298	+	gene	ID=gene-CD630_16960	ID=gene-CD630_16960;Name=CD630_16960;gbkey=Gene;gene_biotype=protein_coding;locus_tag=CD630_16960
gene4059	AM180355.1	3589576	3591003	-	gene	ID=gene-CD630_30890	ID=gene-CD630_30890;Name=CD630_30890;gbkey=Gene;gene_biotype=protein_coding;locus_tag=CD630_30890
gene4071	AM180355.1	3170622	3172064	+	gene	ID=gene-CD630_27340	ID=gene-CD630_27340;Name=CD630_27340;gbkey=Gene;gene_biotype=protein_coding;locus_tag=CD630_27340
gene4080	AM180355.1	1263850	1265304	+	gene	ID=gene-CD630_10700	ID=gene-CD630_10700;Name=CD630_10700;gbkey=Gene;gene_biotype=protein_coding;locus_tag=CD630_10700
gene4081	AM180355.1	1547874	1549319	+	gene	ID=gene-CD630_13340	ID=gene-CD630_13340;Name=purB;gbkey=Gene;gene=purB;gene_biotype=protein_coding;locus_tag=CD630_13340
gene4107	AM180355.1	1001814	1003256	+	gene	ID=gene-CD630_08280	ID=gene-CD630_08280;Name=CD630_08280;gbkey=Gene;gene_biotype=protein_coding;locus_tag=CD630_08280
gene4108	AM180355.1	1062789	1064231	+	gene	ID=gene-CD630_08840	ID=gene-CD630_08840;Name=glgA;gbkey=Gene;gene=glgA;gene_biotype=protein_coding;locus_tag=CD630_08840
gene4109	AM180355.1	2538916	2540358	-	pseudogene	ID=gene-CD630_21930	ID=gene-CD630_21930;Name=cwp24;gbkey=Gene;gene=cwp24;gene_biotype=pseudogene;locus_tag=CD630_21930;pseudo=true;pseudogene=unknown
gene4150	AM180355.1	3194130	3195560	-	gene	ID=gene-CD630_27510	ID=gene-CD630_27510;Name=CD630_27510;gbkey=Gene;gene_biotype=protein_coding;locus_tag=CD630_27510
gene4154	AM180355.1	2064344	2065777	+	gene	ID=gene-CD630_17830	ID=gene-CD630_17830;Name=CD630_17830;gbkey=Gene;gene_biotype=protein_coding;locus_tag=CD630_17830
gene4159	AM180355.1	2289764	2291200	-	gene	ID=gene-CD630_19860	ID=gene-CD630_19860;Name=miaB;gbkey=Gene;gene=miaB;gene_biotype=protein_coding;locus_tag=CD630_19860
gene4162	AM180355.1	3815434	3816870	-	gene	ID=gene-CD630_32580	ID=gene-CD630_32580;Name=CD630_32580;gbkey=Gene;gene_biotype=protein_coding;locus_tag=CD630_32580
gene4176	AM180355.1	1372065	1373456	+	gene	ID=gene-CD630_11730	ID=gene-CD630_11730;Name=CD630_11730;gbkey=Gene;gene_biotype=protein_coding;locus_tag=CD630_11730
gene4183	AM180355.1	2212915	2214348	+	gene	ID=gene-CD630_19120	ID=gene-CD630_19120;Name=eutA;gbkey=Gene;gene=eutA;gene_biotype=protein_coding;locus_tag=CD630_19120
gene4186	AM180355.1	3267136	3268539	-	gene	ID=gene-CD630_27980	ID=gene-CD630_27980;Name=cwp9;gbkey=Gene;gene=cwp9;gene_biotype=protein_coding;locus_tag=CD630_27980
gene4207	AM180355.1	258653	260044	+	gene	ID=gene-CD630_01990	ID=gene-CD630_01990;Name=CD630_01990;gbkey=Gene;gene_biotype=protein_coding;locus_tag=CD630_01990
gene4208	AM180355.1	527476	528888	+	gene	ID=gene-CD630_04440	ID=gene-CD630_04440;Name=ortB;gbkey=Gene;gene=ortB;gene_biotype=protein_coding;locus_tag=CD630_04440
gene4209	AM180355.1	2549149	2550579	-	gene	ID=gene-CD630_22010	ID=gene-CD630_22010;Name=CD630_22010;gbkey=Gene;gene_biotype=protein_coding;locus_tag=CD630_22010
gene4210	AM180355.1	4137954	4139384	+	gene	ID=gene-CD630_35430	ID=gene-CD630_35430;Name=CD630_35430;gbkey=Gene;gene_biotype=protein_coding;locus_tag=CD630_35430
gene4230	AM180355.1	2329848	2331275	+	gene	ID=gene-CD630_20190	ID=gene-CD630_20190;Name=CD630_20190;gbkey=Gene;gene_biotype=protein_coding;locus_tag=CD630_20190
gene4231	AM180355.1	3172413	3173840	-	gene	ID=gene-CD630_27350	ID=gene-CD630_27350;Name=cwp14;gbkey=Gene;gene=cwp14;gene_biotype=protein_coding;locus_tag=CD630_27350
gene4232	AM180355.1	3637050	3638483	-	gene	ID=gene-CD630_31240	ID=gene-CD630_31240;Name=bglA5;gbkey=Gene;gene=bglA5;gene_biotype=protein_coding;locus_tag=CD630_31240
gene4247	AM180355.1	2698677	2700101	-	gene	ID=gene-CD630_23340	ID=gene-CD630_23340;Name=mtlA;gbkey=Gene;gene=mtlA;gene_biotype=protein_coding;locus_tag=CD630_23340
gene4268	AM180355.1	534026	535447	+	gene	ID=gene-CD630_04490	ID=gene-CD630_04490;Name=CD630_04490;gbkey=Gene;gene_biotype=protein_coding;locus_tag=CD630_04490
gene4269	AM180355.1	1359696	1361117	+	gene	ID=gene-CD630_11600	ID=gene-CD630_11600;Name=rng;gbkey=Gene;gene=rng;gene_biotype=protein_coding;locus_tag=CD630_11600
gene4282	AM180355.1	3529842	3531251	-	gene	ID=gene-CD630_30380	ID=gene-CD630_30380;Name=CD630_30380;gbkey=Gene;gene_biotype=protein_coding;locus_tag=CD630_30380
gene4313	AM180355.1	2939907	2941325	-	gene	ID=gene-CD630_25430	ID=gene-CD630_25430;Name=CD630_25430;gbkey=Gene;gene_biotype=protein_coding;locus_tag=CD630_25430
gene4340	AM180355.1	1976366	1977667	+	gene	ID=gene-CD630_17020	ID=gene-CD630_17020;Name=thiC;gbkey=Gene;gene=thiC;gene_biotype=protein_coding;locus_tag=CD630_17020
gene4349	AM180355.1	1947805	1949208	+	gene	ID=gene-CD630_16720	ID=gene-CD630_16720;Name=CD630_16720;gbkey=Gene;gene_biotype=protein_coding;locus_tag=CD630_16720
gene4354	AM180355.1	2846458	2847804	-	gene	ID=gene-CD630_24660	ID=gene-CD630_24660;Name=CD630_24660;gbkey=Gene;gene_biotype=protein_coding;locus_tag=CD630_24660
gene4355	AM180355.1	2879338	2880741	-	gene	ID=gene-CD630_24950	ID=gene-CD630_24950;Name=selA;gbkey=Gene;gene=selA;gene_biotype=protein_coding;locus_tag=CD630_24950
gene4359	AM180355.1	2246421	2247824	-	gene	ID=gene-CD630_19490	ID=gene-CD630_19490;Name=CD630_19490;gbkey=Gene;gene_biotype=protein_coding;locus_tag=CD630_19490
gene4368	AM180355.1	2620887	2622278	-	gene	ID=gene-CD630_22620	ID=gene-CD630_22620;Name=CD630_22620;gbkey=Gene;gene_biotype=protein_coding;locus_tag=CD630_22620
gene4370	AM180355.1	331899	333302	+	gene	ID=gene-CD630_02720	ID=gene-CD630_02720;Name=CD630_02720;gbkey=Gene;gene_biotype=protein_coding;locus_tag=CD630_02720
gene4373	AM180355.1	2937222	2938610	+	gene	ID=gene-CD630_25410	ID=gene-CD630_25410;Name=CD630_25410;gbkey=Gene;gene_biotype=protein_coding;locus_tag=CD630_25410
gene4377	AM180355.1	531538	532947	+	gene	ID=gene-CD630_04470	ID=gene-CD630_04470;Name=CD630_04470;gbkey=Gene;gene_biotype=protein_coding;locus_tag=CD630_04470
gene4378	AM180355.1	2211322	2212731	+	gene	ID=gene-CD630_19110	ID=gene-CD630_19110;Name=eutW;gbkey=Gene;gene=eutW;gene_biotype=protein_coding;locus_tag=CD630_19110
gene4379	AM180355.1	3440028	3441437	-	gene	ID=gene-CD630_29630	ID=gene-CD630_29630;Name=CD630_29630;gbkey=Gene;gene_biotype=protein_coding;locus_tag=CD630_29630
gene4394	AM180355.1	1789452	1790843	+	gene	ID=gene-CD630_15410	ID=gene-CD630_15410;Name=CD630_15410;gbkey=Gene;gene_biotype=protein_coding;locus_tag=CD630_15410
gene4410	AM180355.1	992746	994152	+	gene	ID=gene-CD630_08180	ID=gene-CD630_08180;Name=CD630_08180;gbkey=Gene;gene_biotype=protein_coding;locus_tag=CD630_08180
gene4411	AM180355.1	2402205	2403611	-	gene	ID=gene-CD630_20820	ID=gene-CD630_20820;Name=CD630_20820;gbkey=Gene;gene_biotype=protein_coding;locus_tag=CD630_20820
gene4412	AM180355.1	2645175	2646581	-	gene	ID=gene-CD630_22800	ID=gene-CD630_22800;Name=CD630_22800;gbkey=Gene;gene_biotype=protein_coding;locus_tag=CD630_22800
gene4419	AM180355.1	161770	163116	+	gene	ID=gene-CD630_01190	ID=gene-CD630_01190;Name=glmM;gbkey=Gene;gene=glmM;gene_biotype=protein_coding;locus_tag=CD630_01190
gene4435	AM180355.1	1669137	1670495	+	gene	ID=gene-CD630_14380	ID=gene-CD630_14380;Name=CD630_14380;gbkey=Gene;gene_biotype=protein_coding;locus_tag=CD630_14380
gene4436	AM180355.1	3609893	3611296	-	gene	ID=gene-CD630_31020	ID=gene-CD630_31020;Name=CD630_31020;gbkey=Gene;gene_biotype=protein_coding;locus_tag=CD630_31020
gene4437	AM180355.1	3753581	3754960	-	gene	ID=gene-CD630_32070	ID=gene-CD630_32070;Name=CD630_32070;gbkey=Gene;gene_biotype=protein_coding;locus_tag=CD630_32070
gene4458	AM180355.1	4107768	4109147	-	gene	ID=gene-CD630_35150	ID=gene-CD630_35150;Name=glmU;gbkey=Gene;gene=glmU;gene_biotype=protein_coding;locus_tag=CD630_35150
gene4487	AM180355.1	2596973	2598370	-	gene	ID=gene-CD630_22450	ID=gene-CD630_22450;Name=asnC;gbkey=Gene;gene=asnC;gene_biotype=protein_coding;locus_tag=CD630_22450
gene4507	AM180355.1	3450328	3451719	-	gene	ID=gene-CD630_29690	ID=gene-CD630_29690;Name=CD630_29690;gbkey=Gene;gene_biotype=protein_coding;locus_tag=CD630_29690
gene4510	AM180355.1	1265562	1266956	+	gene	ID=gene-CD630_10720	ID=gene-CD630_10720;Name=CD630_10720;gbkey=Gene;gene_biotype=protein_coding;locus_tag=CD630_10720
gene4511	AM180355.1	1782581	1783975	+	gene	ID=gene-CD630_15370	ID=gene-CD630_15370;Name=aspB1;gbkey=Gene;gene=aspB1;gene_biotype=protein_coding;locus_tag=CD630_15370
gene4512	AM180355.1	1981542	1982936	+	gene	ID=gene-CD630_17070	ID=gene-CD630_17070;Name=CD630_17070;gbkey=Gene;gene_biotype=protein_coding;locus_tag=CD630_17070
gene4513	AM180355.1	2411528	2412922	-	gene	ID=gene-CD630_20890	ID=gene-CD630_20890;Name=CD630_20890;gbkey=Gene;gene_biotype=protein_coding;locus_tag=CD630_20890
gene4514	AM180355.1	2437885	2439279	+	gene	ID=gene-CD630_21090	ID=gene-CD630_21090;Name=CD630_21090;gbkey=Gene;gene_biotype=protein_coding;locus_tag=CD630_21090
gene4515	AM180355.1	4058907	4060301	-	gene	ID=gene-CD630_34680	ID=gene-CD630_34680;Name=atpD1;gbkey=Gene;gene=atpD1;gene_biotype=protein_coding;locus_tag=CD630_34680
gene4545	AM180355.1	4024332	4025708	-	gene	ID=gene-CD630_34340	ID=gene-CD630_34340;Name=cobB;gbkey=Gene;gene=cobB;gene_biotype=protein_coding;locus_tag=CD630_34340
gene4548	AM180355.1	3861935	3863305	+	gene	ID=gene-CD630_32990	ID=gene-CD630_32990;Name=CD630_32990;gbkey=Gene;gene_biotype=protein_coding;locus_tag=CD630_32990
gene4562	AM180355.1	1665326	1666717	+	gene	ID=gene-CD630_14350	ID=gene-CD630_14350;Name=CD630_14350;gbkey=Gene;gene_biotype=protein_coding;locus_tag=CD630_14350
gene4563	AM180355.1	2265596	2266987	-	gene	ID=gene-CD630_19650	ID=gene-CD630_19650;Name=CD630_19650;gbkey=Gene;gene_biotype=protein_coding;locus_tag=CD630_19650
gene4565	AM180355.1	2709328	2710719	-	gene	ID=gene-CD630_23420	ID=gene-CD630_23420;Name=sucD;gbkey=Gene;gene=sucD;gene_biotype=protein_coding;locus_tag=CD630_23420
gene4566	AM180355.1	3606235	3607641	-	gene	ID=gene-CD630_31000	ID=gene-CD630_31000;Name=CD630_31000;gbkey=Gene;gene_biotype=protein_coding;locus_tag=CD630_31000
gene4567	AM180355.1	3716086	3717477	-	gene	ID=gene-CD630_31780	ID=gene-CD630_31780;Name=CD630_31780;gbkey=Gene;gene_biotype=protein_coding;locus_tag=CD630_31780
gene4605	AM180355.1	2062226	2063614	+	gene	ID=gene-CD630_17810	ID=gene-CD630_17810;Name=CD630_17810;gbkey=Gene;gene_biotype=protein_coding;locus_tag=CD630_17810
gene4606	AM180355.1	3494845	3496233	-	gene	ID=gene-CD630_30090	ID=gene-CD630_30090;Name=CD630_30090;gbkey=Gene;gene_biotype=protein_coding;locus_tag=CD630_30090
gene4607	AM180355.1	4161747	4163135	-	gene	ID=gene-CD630_35600	ID=gene-CD630_35600;Name=tilS;gbkey=Gene;gene=tilS;gene_biotype=protein_coding;locus_tag=CD630_35600
gene4608	AM180355.1	4246636	4248024	-	gene	ID=gene-CD630_36380	ID=gene-CD630_36380;Name=CD630_36380;gbkey=Gene;gene_biotype=protein_coding;locus_tag=CD630_36380
gene4623	AM180355.1	884594	885979	+	gene	ID=gene-CD630_07230	ID=gene-CD630_07230;Name=CD630_07230;gbkey=Gene;gene_biotype=protein_coding;locus_tag=CD630_07230
gene4625	AM180355.1	2651915	2653300	+	gene	ID=gene-CD630_22850	ID=gene-CD630_22850;Name=CD630_22850;gbkey=Gene;gene_biotype=protein_coding;locus_tag=CD630_22850
gene4626	AM180355.1	2712321	2713679	-	gene	ID=gene-CD630_23440	ID=gene-CD630_23440;Name=CD630_23440;gbkey=Gene;gene_biotype=protein_coding;locus_tag=CD630_23440
gene4644	AM180355.1	3623232	3624611	-	gene	ID=gene-CD630_31130	ID=gene-CD630_31130;Name=CD630_31130;gbkey=Gene;gene_biotype=protein_coding;locus_tag=CD630_31130
gene4654	AM180355.1	2617378	2618760	+	gene	ID=gene-CD630_22600	ID=gene-CD630_22600;Name=CD630_22600;gbkey=Gene;gene_biotype=protein_coding;locus_tag=CD630_22600
gene4655	AM180355.1	3282128	3283489	-	gene	ID=gene-CD630_28120	ID=gene-CD630_28120;Name=CD630_28120;gbkey=Gene;gene_biotype=protein_coding;locus_tag=CD630_28120
gene4656	AM180355.1	3352430	3353812	-	gene	ID=gene-CD630_28670	ID=gene-CD630_28670;Name=CD630_28670;gbkey=Gene;gene_biotype=protein_coding;locus_tag=CD630_28670
gene4684	AM180355.1	2812841	2814229	-	gene	ID=gene-CD630_24360	ID=gene-CD630_24360;Name=CD630_24360;gbkey=Gene;gene_biotype=protein_coding;locus_tag=CD630_24360
gene4685	AM180355.1	3191324	3192703	-	gene	ID=gene-CD630_27490	ID=gene-CD630_27490;Name=CD630_27490;gbkey=Gene;gene_biotype=protein_coding;locus_tag=CD630_27490
gene4686	AM180355.1	3925332	3926711	-	gene	ID=gene-CD630_33610	ID=gene-CD630_33610;Name=CD630_33610;gbkey=Gene;gene_biotype=protein_coding;locus_tag=CD630_33610
gene4687	AM180355.1	4285924	4287303	-	gene	ID=gene-CD630_36760	ID=gene-CD630_36760;Name=mnmE;gbkey=Gene;gene=mnmE;gene_biotype=protein_coding;locus_tag=CD630_36760
gene4714	AM180355.1	224053	225429	-	gene	ID=gene-CD630_01690	ID=gene-CD630_01690;Name=CD630_01690;gbkey=Gene;gene_biotype=protein_coding;locus_tag=CD630_01690
gene4715	AM180355.1	845722	847098	+	gene	ID=gene-CD630_06960	ID=gene-CD630_06960;Name=CD630_06960;gbkey=Gene;gene_biotype=protein_coding;locus_tag=CD630_06960
gene4716	AM180355.1	979026	980402	+	gene	ID=gene-CD630_08060	ID=gene-CD630_08060;Name=CD630_08060;gbkey=Gene;gene_biotype=protein_coding;locus_tag=CD630_08060
gene4717	AM180355.1	2434639	2436015	-	gene	ID=gene-CD630_21070	ID=gene-CD630_21070;Name=CD630_21070;gbkey=Gene;gene_biotype=protein_coding;locus_tag=CD630_21070
gene4718	AM180355.1	2494571	2495947	+	gene	ID=gene-CD630_21560	ID=gene-CD630_21560;Name=thiH;gbkey=Gene;gene=thiH;gene_biotype=protein_coding;locus_tag=CD630_21560
gene4719	AM180355.1	3295403	3296779	+	gene	ID=gene-CD630_28230	ID=gene-CD630_28230;Name=CD630_28230;gbkey=Gene;gene_biotype=protein_coding;locus_tag=CD630_28230
gene4720	AM180355.1	3879010	3880395	-	gene	ID=gene-CD630_33140	ID=gene-CD630_33140;Name=hydA;gbkey=Gene;gene=hydA;gene_biotype=protein_coding;locus_tag=CD630_33140
gene4734	AM180355.1	524357	525757	+	gene	ID=gene-CD630_04410	ID=gene-CD630_04410;Name=CD630_04410;gbkey=Gene;gene_biotype=protein_coding;locus_tag=CD630_04410
gene4741	AM180355.1	2835179	2836552	-	gene	ID=gene-CD630_24580	ID=gene-CD630_24580;Name=CD630_24580;gbkey=Gene;gene_biotype=protein_coding;locus_tag=CD630_24580
gene4742	AM180355.1	3063141	3064514	-	gene	ID=gene-CD630_26550	ID=gene-CD630_26550;Name=murF;gbkey=Gene;gene=murF;gene_biotype=protein_coding;locus_tag=CD630_26550
gene4743	AM180355.1	3155757	3157130	-	gene	ID=gene-CD630_27200	ID=gene-CD630_27200;Name=CD630_27200;gbkey=Gene;gene_biotype=protein_coding;locus_tag=CD630_27200
gene4744	AM180355.1	3431094	3432467	-	gene	ID=gene-CD630_29550	ID=gene-CD630_29550;Name=atpB;gbkey=Gene;gene=atpB;gene_biotype=protein_coding;locus_tag=CD630_29550
gene4780	AM180355.1	2403629	2404999	-	gene	ID=gene-CD630_20830	ID=gene-CD630_20830;Name=CD630_20830;gbkey=Gene;gene_biotype=protein_coding;locus_tag=CD630_20830
gene4799	AM180355.1	2412995	2414356	-	gene	ID=gene-CD630_20900	ID=gene-CD630_20900;Name=CD630_20900;gbkey=Gene;gene_biotype=protein_coding;locus_tag=CD630_20900
gene4806	AM180355.1	282915	284282	+	gene	ID=gene-CD630_02200	ID=gene-CD630_02200;Name=purF;gbkey=Gene;gene=purF;gene_biotype=protein_coding;locus_tag=CD630_02200
gene4807	AM180355.1	887800	889167	+	gene	ID=gene-CD630_07260	ID=gene-CD630_07260;Name=CD630_07260;gbkey=Gene;gene_biotype=protein_coding;locus_tag=CD630_07260
gene4808	AM180355.1	1148318	1149685	+	gene	ID=gene-CD630_09850	ID=gene-CD630_09850;Name=CD630_09850;gbkey=Gene;gene_biotype=protein_coding;locus_tag=CD630_09850
gene4809	AM180355.1	1983453	1984820	+	gene	ID=gene-CD630_17080	ID=gene-CD630_17080;Name=CD630_17080;gbkey=Gene;gene_biotype=protein_coding;locus_tag=CD630_17080
gene481	AM180355.1	1345602	1348580	+	gene	ID=gene-CD630_11480	ID=gene-CD630_11480;Name=CD630_11480;gbkey=Gene;gene_biotype=protein_coding;locus_tag=CD630_11480
gene4810	AM180355.1	2640783	2642150	+	gene	ID=gene-CD630_22760	ID=gene-CD630_22760;Name=CD630_22760;gbkey=Gene;gene_biotype=protein_coding;locus_tag=CD630_22760
gene4829	AM180355.1	3127142	3128506	+	gene	ID=gene-CD630_27050	ID=gene-CD630_27050;Name=CD630_27050;gbkey=Gene;gene_biotype=protein_coding;locus_tag=CD630_27050
gene4832	AM180355.1	1614107	1615393	+	gene	ID=gene-CD630_13940	ID=gene-CD630_13940;Name=CD630_13940;gbkey=Gene;gene_biotype=protein_coding;locus_tag=CD630_13940
gene4834	AM180355.1	2214366	2215730	+	gene	ID=gene-CD630_19130	ID=gene-CD630_19130;Name=eutB;gbkey=Gene;gene=eutB;gene_biotype=protein_coding;locus_tag=CD630_19130
gene4835	AM180355.1	2551237	2552601	+	gene	ID=gene-CD630_22020	ID=gene-CD630_22020;Name=CD630_22020;gbkey=Gene;gene_biotype=protein_coding;locus_tag=CD630_22020
gene4836	AM180355.1	2555601	2556965	-	gene	ID=gene-CD630_22060	ID=gene-CD630_22060;Name=aldH;gbkey=Gene;gene=aldH;gene_biotype=protein_coding;locus_tag=CD630_22060
gene4837	AM180355.1	2593842	2595206	-	gene	ID=gene-CD630_22430	ID=gene-CD630_22430;Name=CD630_22430;gbkey=Gene;gene_biotype=protein_coding;locus_tag=CD630_22430
gene4838	AM180355.1	3018112	3019515	-	gene	ID=gene-CD630_26120	ID=gene-CD630_26120;Name=CD630_26120;gbkey=Gene;gene_biotype=protein_coding;locus_tag=CD630_26120
gene4861	AM180355.1	3033504	3034859	-	gene	ID=gene-CD630_26260	ID=gene-CD630_26260;Name=CD630_26260;gbkey=Gene;gene_biotype=protein_coding;locus_tag=CD630_26260
gene4862	AM180355.1	2949671	2950948	-	gene	ID=gene-CD630_25500	ID=gene-CD630_25500;Name=CD630_25500;gbkey=Gene;gene_biotype=protein_coding;locus_tag=CD630_25500
gene4866	AM180355.1	2235482	2236843	-	gene	ID=gene-CD630_19380	ID=gene-CD630_19380;Name=accC;gbkey=Gene;gene=accC;gene_biotype=protein_coding;locus_tag=CD630_19380
gene4867	AM180355.1	2871901	2873271	-	gene	ID=gene-CD630_24900	ID=gene-CD630_24900;Name=CD630_24900;gbkey=Gene;gene_biotype=protein_coding;locus_tag=CD630_24900
gene4883	AM180355.1	3060758	3062113	-	gene	ID=gene-CD630_26530	ID=gene-CD630_26530;Name=murD;gbkey=Gene;gene=murD;gene_biotype=protein_coding;locus_tag=CD630_26530
gene4906	AM180355.1	1676723	1678081	+	gene	ID=gene-CD630_14460	ID=gene-CD630_14460;Name=pabB;gbkey=Gene;gene=pabB;gene_biotype=protein_coding;locus_tag=CD630_14460
gene4908	AM180355.1	2225996	2227354	+	gene	ID=gene-CD630_19280	ID=gene-CD630_19280;Name=CD630_19280;gbkey=Gene;gene_biotype=protein_coding;locus_tag=CD630_19280
gene4909	AM180355.1	2392113	2393471	-	gene	ID=gene-CD630_20750	ID=gene-CD630_20750;Name=pbuX;gbkey=Gene;gene=pbuX;gene_biotype=protein_coding;locus_tag=CD630_20750
gene4925	AM180355.1	1456109	1457461	+	gene	ID=gene-CD630_12520	ID=gene-CD630_12520;Name=ffh;gbkey=Gene;gene=ffh;gene_biotype=protein_coding;locus_tag=CD630_12520
gene4928	AM180355.1	2436461	2437807	+	gene	ID=gene-CD630_21080	ID=gene-CD630_21080;Name=CD630_21080;gbkey=Gene;gene_biotype=protein_coding;locus_tag=CD630_21080
gene4935	AM180355.1	659280	660590	+	gene	ID=gene-CD630_05530	ID=gene-CD630_05530;Name=CD630_05530;gbkey=Gene;gene_biotype=protein_coding;locus_tag=CD630_05530
gene4937	AM180355.1	1642283	1643638	-	gene	ID=gene-CD630_14180	ID=gene-CD630_14180;Name=CD630_14180;gbkey=Gene;gene_biotype=protein_coding;locus_tag=CD630_14180
gene495	AM180355.1	2690139	2693078	-	gene	ID=gene-CD630_23280	ID=gene-CD630_23280;Name=CD630_23280;gbkey=Gene;gene_biotype=protein_coding;locus_tag=CD630_23280
gene4966	AM180355.1	2896691	2898043	-	gene	ID=gene-CD630_25090	ID=gene-CD630_25090;Name=CD630_25090;gbkey=Gene;gene_biotype=protein_coding;locus_tag=CD630_25090
gene4967	AM180355.1	3719061	3720413	-	gene	ID=gene-CD630_31800	ID=gene-CD630_31800;Name=CD630_31800;gbkey=Gene;gene_biotype=protein_coding;locus_tag=CD630_31800
gene4968	AM180355.1	4110891	4112243	+	gene	ID=gene-CD630_35180	ID=gene-CD630_35180;Name=murC;gbkey=Gene;gene=murC;gene_biotype=protein_coding;locus_tag=CD630_35180
gene4978	AM180355.1	3703532	3704824	-	gene	ID=gene-CD630_31700	ID=gene-CD630_31700;Name=eno;gbkey=Gene;gene=eno;gene_biotype=protein_coding;locus_tag=CD630_31700
gene4986	AM180355.1	2414653	2416002	-	gene	ID=gene-CD630_20910	ID=gene-CD630_20910;Name=CD630_20910;gbkey=Gene;gene_biotype=protein_coding;locus_tag=CD630_20910
gene4987	AM180355.1	3351069	3352418	-	gene	ID=gene-CD630_28660	ID=gene-CD630_28660;Name=CD630_28660;gbkey=Gene;gene_biotype=protein_coding;locus_tag=CD630_28660
gene4988	AM180355.1	3847121	3848470	-	gene	ID=gene-CD630_32850	ID=gene-CD630_32850;Name=pgi;gbkey=Gene;gene=pgi;gene_biotype=protein_coding;locus_tag=CD630_32850
gene4989	AM180355.1	3857834	3859183	-	gene	ID=gene-CD630_32960	ID=gene-CD630_32960;Name=CD630_32960;gbkey=Gene;gene_biotype=protein_coding;locus_tag=CD630_32960
gene4990	AM180355.1	3871765	3873114	-	gene	ID=gene-CD630_33080	ID=gene-CD630_33080;Name=rph;gbkey=Gene;gene=rph;gene_biotype=protein_coding;locus_tag=CD630_33080
gene5002	AM180355.1	3541901	3543247	-	gene	ID=gene-CD630_30480	ID=gene-CD630_30480;Name=CD630_30480;gbkey=Gene;gene_biotype=protein_coding;locus_tag=CD630_30480
gene5014	AM180355.1	3340686	3341975	-	gene	ID=gene-CD630_28580	ID=gene-CD630_28580;Name=CD630_28580;gbkey=Gene;gene_biotype=protein_coding;locus_tag=CD630_28580
gene5017	AM180355.1	973198	974538	+	gene	ID=gene-CD630_08010	ID=gene-CD630_08010;Name=CD630_08010;gbkey=Gene;gene_biotype=protein_coding;locus_tag=CD630_08010
gene5023	AM180355.1	2273148	2274494	-	gene	ID=gene-CD630_19720	ID=gene-CD630_19720;Name=CD630_19720;gbkey=Gene;gene_biotype=protein_coding;locus_tag=CD630_19720
gene5025	AM180355.1	3712033	3713379	-	gene	ID=gene-CD630_31760	ID=gene-CD630_31760;Name=rpoN;gbkey=Gene;gene=rpoN;gene_biotype=protein_coding;locus_tag=CD630_31760
gene5041	AM180355.1	3125620	3126963	+	gene	ID=gene-CD630_27040	ID=gene-CD630_27040;Name=CD630_27040;gbkey=Gene;gene_biotype=protein_coding;locus_tag=CD630_27040
gene5049	AM180355.1	1422867	1424207	+	gene	ID=gene-CD630_12250	ID=gene-CD630_12250;Name=pdp;gbkey=Gene;gene=pdp;gene_biotype=protein_coding;locus_tag=CD630_12250
gene5052	AM180355.1	687910	689250	+	gene	ID=gene-CD630_05760	ID=gene-CD630_05760;Name=CD630_05760;gbkey=Gene;gene_biotype=protein_coding;locus_tag=CD630_05760
gene5053	AM180355.1	3362788	3364128	-	gene	ID=gene-CD630_28740	ID=gene-CD630_28740;Name=CD630_28740;gbkey=Gene;gene_biotype=protein_coding;locus_tag=CD630_28740
gene5067	AM180355.1	1336456	1337793	+	gene	ID=gene-CD630_11370	ID=gene-CD630_11370;Name=rnfC;gbkey=Gene;gene=rnfC;gene_biotype=protein_coding;locus_tag=CD630_11370
gene5068	AM180355.1	3558609	3559946	-	gene	ID=gene-CD630_30640	ID=gene-CD630_30640;Name=xylA;gbkey=Gene;gene=xylA;gene_biotype=protein_coding;locus_tag=CD630_30640
gene507	AM180355.1	2647666	2650569	-	gene	ID=gene-CD630_22830	ID=gene-CD630_22830;Name=CD630_22830;gbkey=Gene;gene_biotype=protein_coding;locus_tag=CD630_22830
gene5090	AM180355.1	2935547	2936881	-	gene	ID=gene-CD630_25400	ID=gene-CD630_25400;Name=CD630_25400;gbkey=Gene;gene_biotype=protein_coding;locus_tag=CD630_25400
gene5091	AM180355.1	3095530	3096864	+	gene	ID=gene-CD630_26800	ID=gene-CD630_26800;Name=CD630_26800;gbkey=Gene;gene_biotype=protein_coding;locus_tag=CD630_26800
gene5105	AM180355.1	2929026	2930300	-	gene	ID=gene-CD630_25350	ID=gene-CD630_25350;Name=CD630_25350;gbkey=Gene;gene_biotype=protein_coding;locus_tag=CD630_25350
gene5112	AM180355.1	3041074	3042399	-	gene	ID=gene-CD630_26320	ID=gene-CD630_26320;Name=CD630_26320;gbkey=Gene;gene_biotype=protein_coding;locus_tag=CD630_26320
gene5122	AM180355.1	3552857	3554188	-	gene	ID=gene-CD630_30600	ID=gene-CD630_30600;Name=CD630_30600;gbkey=Gene;gene_biotype=protein_coding;locus_tag=CD630_30600
gene5127	AM180355.1	1742795	1744120	-	gene	ID=gene-CD630_15060	ID=gene-CD630_15060;Name=CD630_15060;gbkey=Gene;gene_biotype=protein_coding;locus_tag=CD630_15060
gene5148	AM180355.1	3371364	3372677	-	gene	ID=gene-CD630_28830	ID=gene-CD630_28830;Name=celB;gbkey=Gene;gene=celB;gene_biotype=protein_coding;locus_tag=CD630_28830
gene5149	AM180355.1	1040194	1041522	+	gene	ID=gene-CD630_08640	ID=gene-CD630_08640;Name=CD630_08640;gbkey=Gene;gene_biotype=protein_coding;locus_tag=CD630_08640
gene5150	AM180355.1	1802619	1803947	+	gene	ID=gene-CD630_15550	ID=gene-CD630_15550;Name=CD630_15550;gbkey=Gene;gene_biotype=protein_coding;locus_tag=CD630_15550
gene5151	AM180355.1	3042427	3043764	-	gene	ID=gene-CD630_26330	ID=gene-CD630_26330;Name=CD630_26330;gbkey=Gene;gene_biotype=protein_coding;locus_tag=CD630_26330
gene5152	AM180355.1	3620470	3621798	+	gene	ID=gene-CD630_31110	ID=gene-CD630_31110;Name=CD630_31110;gbkey=Gene;gene_biotype=protein_coding;locus_tag=CD630_31110
gene5153	AM180355.1	3720612	3721940	-	gene	ID=gene-CD630_31810	ID=gene-CD630_31810;Name=CD630_31810;gbkey=Gene;gene_biotype=protein_coding;locus_tag=CD630_31810
gene5154	AM180355.1	4268087	4269415	-	gene	ID=gene-CD630_36570	ID=gene-CD630_36570;Name=dnaC;gbkey=Gene;gene=dnaC;gene_biotype=protein_coding;locus_tag=CD630_36570
gene5173	AM180355.1	2496541	2497866	-	gene	ID=gene-CD630_21580	ID=gene-CD630_21580;Name=gabT;gbkey=Gene;gene=gabT;gene_biotype=protein_coding;locus_tag=CD630_21580
gene5174	AM180355.1	2985615	2986940	-	gene	ID=gene-CD630_25810	ID=gene-CD630_25810;Name=rsmB;gbkey=Gene;gene=rsmB;gene_biotype=protein_coding;locus_tag=CD630_25810
gene5191	AM180355.1	2844912	2846225	-	gene	ID=gene-CD630_24650	ID=gene-CD630_24650;Name=CD630_24650;gbkey=Gene;gene_biotype=protein_coding;locus_tag=CD630_24650
gene5192	AM180355.1	3046159	3047448	-	gene	ID=gene-CD630_26370	ID=gene-CD630_26370;Name=CD630_26370;gbkey=Gene;gene_biotype=protein_coding;locus_tag=CD630_26370
gene5199	AM180355.1	1454361	1455641	+	gene	ID=gene-CD630_12510	ID=gene-CD630_12510;Name=ftsY;gbkey=Gene;gene=ftsY;gene_biotype=protein_coding;locus_tag=CD630_12510
gene5200	AM180355.1	1261582	1262913	-	gene	ID=gene-CD630_10680	ID=gene-CD630_10680;Name=CD630_10680;gbkey=Gene;gene_biotype=protein_coding;locus_tag=CD630_10680
gene5201	AM180355.1	2014359	2015681	+	gene	ID=gene-CD630_17390	ID=gene-CD630_17390;Name=CD630_17390;gbkey=Gene;gene_biotype=protein_coding;locus_tag=CD630_17390
gene5203	AM180355.1	4034823	4036145	-	gene	ID=gene-CD630_34430	ID=gene-CD630_34430;Name=CD630_34430;gbkey=Gene;gene_biotype=protein_coding;locus_tag=CD630_34430
gene5205	AM180355.1	1333890	1335185	+	gene	ID=gene-CD630_11350	ID=gene-CD630_11350;Name=CD630_11350;gbkey=Gene;gene_biotype=protein_coding;locus_tag=CD630_11350
gene5239	AM180355.1	1	1320	+	gene	ID=gene-CD630_00010	ID=gene-CD630_00010;Name=dnaA;gbkey=Gene;gene=dnaA;gene_biotype=protein_coding;locus_tag=CD630_00010
gene5241	AM180355.1	3594076	3595395	-	gene	ID=gene-CD630_30920	ID=gene-CD630_30920;Name=CD630_30920;gbkey=Gene;gene_biotype=protein_coding;locus_tag=CD630_30920
gene5254	AM180355.1	2722176	2723462	-	gene	ID=gene-CD630_23540	ID=gene-CD630_23540;Name=grdE;gbkey=Gene;gene=grdE;gene_biotype=protein_coding;locus_tag=CD630_23540
gene5255	AM180355.1	2779281	2780591	+	gene	ID=gene-CD630_24080	ID=gene-CD630_24080;Name=CD630_24080;gbkey=Gene;gene_biotype=protein_coding;locus_tag=CD630_24080
gene5258	AM180355.1	2884693	2886009	-	gene	ID=gene-CD630_25000	ID=gene-CD630_25000;Name=argH;gbkey=Gene;gene=argH;gene_biotype=protein_coding;locus_tag=CD630_25000
gene5269	AM180355.1	2123357	2124670	+	gene	ID=gene-CD630_18340	ID=gene-CD630_18340;Name=aroA;gbkey=Gene;gene=aroA;gene_biotype=protein_coding;locus_tag=CD630_18340
gene5273	AM180355.1	718446	719759	+	gene	ID=gene-CD630_05940	ID=gene-CD630_05940;Name=CD630_05940;gbkey=Gene;gene_biotype=protein_coding;locus_tag=CD630_05940
gene5274	AM180355.1	1389920	1391248	+	gene	ID=gene-CD630_11890	ID=gene-CD630_11890;Name=CD630_11890;gbkey=Gene;gene_biotype=protein_coding;locus_tag=CD630_11890
gene5275	AM180355.1	2397259	2398572	-	gene	ID=gene-CD630_20780	ID=gene-CD630_20780;Name=CD630_20780;gbkey=Gene;gene_biotype=protein_coding;locus_tag=CD630_20780
gene5276	AM180355.1	3801552	3802865	-	gene	ID=gene-CD630_32470	ID=gene-CD630_32470;Name=prdC;gbkey=Gene;gene=prdC;gene_biotype=protein_coding;locus_tag=CD630_32470
gene5289	AM180355.1	1463942	1465234	+	gene	ID=gene-CD630_12600	ID=gene-CD630_12600;Name=brnQ-2;gbkey=Gene;gene=brnQ-2;gene_biotype=protein_coding;locus_tag=CD630_12600
gene5290	AM180355.1	2054056	2055363	+	gene	ID=gene-CD630_17730	ID=gene-CD630_17730;Name=CD630_17730;gbkey=Gene;gene_biotype=protein_coding;locus_tag=CD630_17730
gene5294	AM180355.1	632929	634239	-	gene	ID=gene-CD630_05280	ID=gene-CD630_05280;Name=CD630_05280;gbkey=Gene;gene_biotype=protein_coding;locus_tag=CD630_05280
gene5295	AM180355.1	3369977	3371287	-	gene	ID=gene-CD630_28820	ID=gene-CD630_28820;Name=celF;gbkey=Gene;gene=celF;gene_biotype=protein_coding;locus_tag=CD630_28820
gene533	AM180355.1	2279295	2282138	-	gene	ID=gene-CD630_19770	ID=gene-CD630_19770;Name=mutS;gbkey=Gene;gene=mutS;gene_biotype=protein_coding;locus_tag=CD630_19770
gene5354	AM180355.1	350785	352092	+	gene	ID=gene-CD630_02910	ID=gene-CD630_02910;Name=CD630_02910;gbkey=Gene;gene_biotype=protein_coding;locus_tag=CD630_02910
gene5355	AM180355.1	2705898	2707205	-	gene	ID=gene-CD630_23390	ID=gene-CD630_23390;Name=cat2;gbkey=Gene;gene=cat2;gene_biotype=protein_coding;locus_tag=CD630_23390
gene5356	AM180355.1	3783072	3784355	-	gene	ID=gene-CD630_32320	ID=gene-CD630_32320;Name=CD630_32320;gbkey=Gene;gene_biotype=protein_coding;locus_tag=CD630_32320
gene536	AM180355.1	614211	617045	-	gene	ID=gene-CD630_05160	ID=gene-CD630_05160;Name=CD630_05160;gbkey=Gene;gene_biotype=protein_coding;locus_tag=CD630_05160
gene5369	AM180355.1	4274525	4275721	-	gene	ID=gene-CD630_36640	ID=gene-CD630_36640;Name=CD630_36640;gbkey=Gene;gene_biotype=protein_coding;locus_tag=CD630_36640
gene5371	AM180355.1	3999672	4000976	-	gene	ID=gene-CD630_34140	ID=gene-CD630_34140;Name=CD630_34140;gbkey=Gene;gene_biotype=protein_coding;locus_tag=CD630_34140
gene5378	AM180355.1	3162737	3163981	-	gene	ID=gene-CD630_27260	ID=gene-CD630_27260;Name=glyA;gbkey=Gene;gene=glyA;gene_biotype=protein_coding;locus_tag=CD630_27260
gene5383	AM180355.1	2427674	2428942	-	gene	ID=gene-CD630_21020	ID=gene-CD630_21020;Name=CD630_21020;gbkey=Gene;gene_biotype=protein_coding;locus_tag=CD630_21020
gene5387	AM180355.1	748113	749414	+	gene	ID=gene-CD630_06260	ID=gene-CD630_06260;Name=CD630_06260;gbkey=Gene;gene_biotype=protein_coding;locus_tag=CD630_06260
gene5388	AM180355.1	2736667	2737968	-	gene	ID=gene-CD630_23710	ID=gene-CD630_23710;Name=nadB;gbkey=Gene;gene=nadB;gene_biotype=protein_coding;locus_tag=CD630_23710
gene5389	AM180355.1	4254661	4255962	-	gene	ID=gene-CD630_36450	ID=gene-CD630_36450;Name=licC;gbkey=Gene;gene=licC;gene_biotype=protein_coding;locus_tag=CD630_36450
gene5400	AM180355.1	3311643	3312899	-	gene	ID=gene-CD630_28340	ID=gene-CD630_28340;Name=glyA1;gbkey=Gene;gene=glyA1;gene_biotype=protein_coding;locus_tag=CD630_28340
gene5412	AM180355.1	2822383	2823681	-	gene	ID=gene-CD630_24480	ID=gene-CD630_24480;Name=CD630_24480;gbkey=Gene;gene_biotype=protein_coding;locus_tag=CD630_24480
gene5413	AM180355.1	3806616	3807914	-	gene	ID=gene-CD630_32530	ID=gene-CD630_32530;Name=folC;gbkey=Gene;gene=folC;gene_biotype=protein_coding;locus_tag=CD630_32530
gene5442	AM180355.1	1038389	1039693	+	gene	ID=gene-CD630_08620	ID=gene-CD630_08620;Name=CD630_08620;gbkey=Gene;gene_biotype=protein_coding;locus_tag=CD630_08620
gene5445	AM180355.1	165666	166961	+	gene	ID=gene-CD630_01210	ID=gene-CD630_01210;Name=CD630_01210;gbkey=Gene;gene_biotype=protein_coding;locus_tag=CD630_01210
gene5464	AM180355.1	1461531	1462823	+	gene	ID=gene-CD630_12590	ID=gene-CD630_12590;Name=brnQ-1;gbkey=Gene;gene=brnQ-1;gene_biotype=protein_coding;locus_tag=CD630_12590
gene5465	AM180355.1	2366390	2367682	-	gene	ID=gene-CD630_20530	ID=gene-CD630_20530;Name=lysA;gbkey=Gene;gene=lysA;gene_biotype=protein_coding;locus_tag=CD630_20530
gene5466	AM180355.1	2785950	2787242	-	gene	ID=gene-CD630_24130	ID=gene-CD630_24130;Name=CD630_24130;gbkey=Gene;gene_biotype=protein_coding;locus_tag=CD630_24130
gene5467	AM180355.1	4277066	4278358	-	gene	ID=gene-CD630_36680	ID=gene-CD630_36680;Name=CD630_36680;gbkey=Gene;gene_biotype=protein_coding;locus_tag=CD630_36680
gene5477	AM180355.1	2882690	2883979	+	gene	ID=gene-CD630_24980	ID=gene-CD630_24980;Name=dacF1;gbkey=Gene;gene=dacF1;gene_biotype=protein_coding;locus_tag=CD630_24980
gene5483	AM180355.1	960647	961930	+	gene	ID=gene-CD630_07880	ID=gene-CD630_07880;Name=CD630_07880;gbkey=Gene;gene_biotype=protein_coding;locus_tag=CD630_07880
gene5488	AM180355.1	1990110	1991399	+	gene	ID=gene-CD630_17160	ID=gene-CD630_17160;Name=CD630_17160;gbkey=Gene;gene_biotype=protein_coding;locus_tag=CD630_17160
gene5490	AM180355.1	4266203	4267492	-	gene	ID=gene-CD630_36550	ID=gene-CD630_36550;Name=purA;gbkey=Gene;gene=purA;gene_biotype=protein_coding;locus_tag=CD630_36550
gene550	AM180355.1	3993346	3996171	-	gene	ID=gene-CD630_34110	ID=gene-CD630_34110;Name=uvrA;gbkey=Gene;gene=uvrA;gene_biotype=protein_coding;locus_tag=CD630_34110
gene5501	AM180355.1	4237057	4238328	-	gene	ID=gene-CD630_36290	ID=gene-CD630_36290;Name=CD630_36290;gbkey=Gene;gene_biotype=protein_coding;locus_tag=CD630_36290
gene5513	AM180355.1	627357	628643	+	gene	ID=gene-CD630_05230	ID=gene-CD630_05230;Name=CD630_05230;gbkey=Gene;gene_biotype=protein_coding;locus_tag=CD630_05230
gene5514	AM180355.1	2015960	2017246	+	gene	ID=gene-CD630_17400	ID=gene-CD630_17400;Name=CD630_17400;gbkey=Gene;gene_biotype=protein_coding;locus_tag=CD630_17400
gene5515	AM180355.1	3069605	3070891	-	gene	ID=gene-CD630_26600	ID=gene-CD630_26600;Name=CD630_26600;gbkey=Gene;gene_biotype=protein_coding;locus_tag=CD630_26600
gene5516	AM180355.1	3869815	3871101	-	gene	ID=gene-CD630_33060	ID=gene-CD630_33060;Name=tig;gbkey=Gene;gene=tig;gene_biotype=protein_coding;locus_tag=CD630_33060
gene5531	AM180355.1	1373718	1374998	-	gene	ID=gene-CD630_11740	ID=gene-CD630_11740;Name=CD630_11740;gbkey=Gene;gene_biotype=protein_coding;locus_tag=CD630_11740
gene5532	AM180355.1	2442024	2443301	-	gene	ID=gene-CD630_21130	ID=gene-CD630_21130;Name=CD630_21130;gbkey=Gene;gene_biotype=protein_coding;locus_tag=CD630_21130
gene5537	AM180355.1	3496354	3497631	-	gene	ID=gene-CD630_30100	ID=gene-CD630_30100;Name=CD630_30100;gbkey=Gene;gene_biotype=protein_coding;locus_tag=CD630_30100
gene5540	AM180355.1	3123052	3124335	-	gene	ID=gene-CD630_27020	ID=gene-CD630_27020;Name=brnQ;gbkey=Gene;gene=brnQ;gene_biotype=protein_coding;locus_tag=CD630_27020
gene5555	AM180355.1	1368741	1370015	+	gene	ID=gene-CD630_11700	ID=gene-CD630_11700;Name=CD630_11700;gbkey=Gene;gene_biotype=protein_coding;locus_tag=CD630_11700
gene5562	AM180355.1	2274563	2275843	-	gene	ID=gene-CD630_19730	ID=gene-CD630_19730;Name=CD630_19730;gbkey=Gene;gene_biotype=protein_coding;locus_tag=CD630_19730
gene5563	AM180355.1	3157359	3158681	-	gene	ID=gene-CD630_27210	ID=gene-CD630_27210;Name=CD630_27210;gbkey=Gene;gene_biotype=protein_coding;locus_tag=CD630_27210
gene5574	AM180355.1	1366526	1367785	-	gene	ID=gene-CD630_11680	ID=gene-CD630_11680;Name=CD630_11680;gbkey=Gene;gene_biotype=protein_coding;locus_tag=CD630_11680
gene558	AM180355.1	1726931	1729678	+	gene	ID=gene-CD630_14920	ID=gene-CD630_14920;Name=CD630_14920;gbkey=Gene;gene_biotype=protein_coding;locus_tag=CD630_14920
gene5582	AM180355.1	1362276	1363553	+	gene	ID=gene-CD630_11640	ID=gene-CD630_11640;Name=obgE;gbkey=Gene;gene=obgE;gene_biotype=protein_coding;locus_tag=CD630_11640
gene5583	AM180355.1	2387497	2388774	-	gene	ID=gene-CD630_20720	ID=gene-CD630_20720;Name=CD630_20720;gbkey=Gene;gene_biotype=protein_coding;locus_tag=CD630_20720
gene5623	AM180355.1	1149885	1151159	+	gene	ID=gene-CD630_09860	ID=gene-CD630_09860;Name=rpsA;gbkey=Gene;gene=rpsA;gene_biotype=protein_coding;locus_tag=CD630_09860
gene5624	AM180355.1	2687423	2688697	-	gene	ID=gene-CD630_23250	ID=gene-CD630_23250;Name=CD630_23250;gbkey=Gene;gene_biotype=protein_coding;locus_tag=CD630_23250
gene5625	AM180355.1	3052566	3053840	-	gene	ID=gene-CD630_26450	ID=gene-CD630_26450;Name=CD630_26450;gbkey=Gene;gene_biotype=protein_coding;locus_tag=CD630_26450
gene5628	AM180355.1	1697852	1699126	+	gene	ID=gene-CD630_14680	ID=gene-CD630_14680;Name=CD630_14680;gbkey=Gene;gene_biotype=protein_coding;locus_tag=CD630_14680
gene5638	AM180355.1	3070906	3072171	-	gene	ID=gene-CD630_26610	ID=gene-CD630_26610;Name=CD630_26610;gbkey=Gene;gene_biotype=protein_coding;locus_tag=CD630_26610
gene5641	AM180355.1	2110904	2112169	+	gene	ID=gene-CD630_18250	ID=gene-CD630_18250;Name=metY;gbkey=Gene;gene=metY;gene_biotype=protein_coding;locus_tag=CD630_18250
gene5645	AM180355.1	17952	19223	+	gene	ID=gene-CD630_00140	ID=gene-CD630_00140;Name=serS1;gbkey=Gene;gene=serS1;gene_biotype=protein_coding;locus_tag=CD630_00140
gene5646	AM180355.1	656969	658240	-	gene	ID=gene-CD630_05510	ID=gene-CD630_05510;Name=sleC;gbkey=Gene;gene=sleC;gene_biotype=protein_coding;locus_tag=CD630_05510
gene5647	AM180355.1	2558581	2559858	-	gene	ID=gene-CD630_22090	ID=gene-CD630_22090;Name=CD630_22090;gbkey=Gene;gene_biotype=protein_coding;locus_tag=CD630_22090
gene5648	AM180355.1	3320190	3321461	-	gene	ID=gene-CD630_28400	ID=gene-CD630_28400;Name=serS1A;gbkey=Gene;gene=serS1A;gene_biotype=protein_coding;locus_tag=CD630_28400
gene5670	AM180355.1	2608761	2610029	-	gene	ID=gene-CD630_22520	ID=gene-CD630_22520;Name=kamA;gbkey=Gene;gene=kamA;gene_biotype=protein_coding;locus_tag=CD630_22520
gene5696	AM180355.1	2797912	2799171	-	gene	ID=gene-CD630_24230	ID=gene-CD630_24230;Name=CD630_24230;gbkey=Gene;gene_biotype=protein_coding;locus_tag=CD630_24230
gene5700	AM180355.1	236792	238057	+	gene	ID=gene-CD630_01790	ID=gene-CD630_01790;Name=gluD;gbkey=Gene;gene=gluD;gene_biotype=protein_coding;locus_tag=CD630_01790
gene5701	AM180355.1	272457	273722	+	gene	ID=gene-CD630_02090	ID=gene-CD630_02090;Name=CD630_02090;gbkey=Gene;gene_biotype=protein_coding;locus_tag=CD630_02090
gene5702	AM180355.1	1482638	1483903	+	gene	ID=gene-CD630_12760	ID=gene-CD630_12760;Name=CD630_12760;gbkey=Gene;gene_biotype=protein_coding;locus_tag=CD630_12760
gene5703	AM180355.1	1768750	1770015	+	gene	ID=gene-CD630_15260	ID=gene-CD630_15260;Name=pyrC;gbkey=Gene;gene=pyrC;gene_biotype=protein_coding;locus_tag=CD630_15260
gene5704	AM180355.1	1833688	1834953	+	gene	ID=gene-CD630_15820	ID=gene-CD630_15820;Name=hisD;gbkey=Gene;gene=hisD;gene_biotype=protein_coding;locus_tag=CD630_15820
gene5705	AM180355.1	1966112	1967377	-	gene	ID=gene-CD630_16950	ID=gene-CD630_16950;Name=CD630_16950;gbkey=Gene;gene_biotype=protein_coding;locus_tag=CD630_16950
gene571	AM180355.1	3308697	3311471	-	gene	ID=gene-CD630_28330	ID=gene-CD630_28330;Name=CD630_28330;gbkey=Gene;gene_biotype=protein_coding;locus_tag=CD630_28330
gene5746	AM180355.1	364777	366039	+	gene	ID=gene-CD630_03030	ID=gene-CD630_03030;Name=argE;gbkey=Gene;gene=argE;gene_biotype=protein_coding;locus_tag=CD630_03030
gene5747	AM180355.1	2867791	2869053	-	gene	ID=gene-CD630_24860	ID=gene-CD630_24860;Name=CD630_24860;gbkey=Gene;gene_biotype=protein_coding;locus_tag=CD630_24860
gene5748	AM180355.1	3179565	3180827	-	gene	ID=gene-CD630_27400	ID=gene-CD630_27400;Name=hisS;gbkey=Gene;gene=hisS;gene_biotype=protein_coding;locus_tag=CD630_27400
gene5749	AM180355.1	3998347	3999609	-	gene	ID=gene-CD630_34130	ID=gene-CD630_34130;Name=CD630_34130;gbkey=Gene;gene_biotype=protein_coding;locus_tag=CD630_34130
gene5778	AM180355.1	2486128	2487387	-	gene	ID=gene-CD630_21490	ID=gene-CD630_21490;Name=CD630_21490;gbkey=Gene;gene_biotype=protein_coding;locus_tag=CD630_21490
gene5779	AM180355.1	2748166	2749425	-	gene	ID=gene-CD630_23820	ID=gene-CD630_23820;Name=CD630_23820;gbkey=Gene;gene_biotype=protein_coding;locus_tag=CD630_23820
gene578	AM180355.1	1896319	1899078	+	gene	ID=gene-CD630_16370	ID=gene-CD630_16370;Name=CD630_16370;gbkey=Gene;gene_biotype=protein_coding;locus_tag=CD630_16370
gene5798	AM180355.1	1161080	1162330	+	gene	ID=gene-CD630_09960	ID=gene-CD630_09960;Name=CD630_09960;gbkey=Gene;gene_biotype=protein_coding;locus_tag=CD630_09960
gene5800	AM180355.1	1770301	1771533	-	gene	ID=gene-CD630_15270	ID=gene-CD630_15270;Name=CD630_15270;gbkey=Gene;gene_biotype=protein_coding;locus_tag=CD630_15270
gene5802	AM180355.1	1875530	1876780	+	gene	ID=gene-CD630_16200	ID=gene-CD630_16200;Name=CD630_16200;gbkey=Gene;gene_biotype=protein_coding;locus_tag=CD630_16200
gene5810	AM180355.1	1202261	1203517	+	gene	ID=gene-CD630_10300	ID=gene-CD630_10300;Name=CD630_10300;gbkey=Gene;gene_biotype=protein_coding;locus_tag=CD630_10300
gene5811	AM180355.1	1633314	1634570	+	gene	ID=gene-CD630_14090	ID=gene-CD630_14090;Name=CD630_14090;gbkey=Gene;gene_biotype=protein_coding;locus_tag=CD630_14090
gene5821	AM180355.1	4019514	4020740	-	gene	ID=gene-CD630_34290	ID=gene-CD630_34290;Name=cbiD;gbkey=Gene;gene=cbiD;gene_biotype=protein_coding;locus_tag=CD630_34290
gene583	AM180355.1	3837777	3840533	-	gene	ID=gene-CD630_32800	ID=gene-CD630_32800;Name=CD630_32800;gbkey=Gene;gene_biotype=protein_coding;locus_tag=CD630_32800
gene5837	AM180355.1	1236595	1237848	+	gene	ID=gene-CD630_10440	ID=gene-CD630_10440;Name=CD630_10440;gbkey=Gene;gene_biotype=protein_coding;locus_tag=CD630_10440
gene5840	AM180355.1	168164	169435	+	gene	ID=gene-CD630_01230	ID=gene-CD630_01230;Name=murA;gbkey=Gene;gene=murA;gene_biotype=protein_coding;locus_tag=CD630_01230
gene5841	AM180355.1	2022508	2023761	-	gene	ID=gene-CD630_17460	ID=gene-CD630_17460;Name=gltC;gbkey=Gene;gene=gltC;gene_biotype=protein_coding;locus_tag=CD630_17460
gene5842	AM180355.1	2097550	2098803	+	gene	ID=gene-CD630_18150	ID=gene-CD630_18150;Name=CD630_18150;gbkey=Gene;gene_biotype=protein_coding;locus_tag=CD630_18150
gene5843	AM180355.1	2636600	2637853	-	gene	ID=gene-CD630_22740	ID=gene-CD630_22740;Name=CD630_22740;gbkey=Gene;gene_biotype=protein_coding;locus_tag=CD630_22740
gene5844	AM180355.1	4175813	4177066	-	gene	ID=gene-CD630_35760	ID=gene-CD630_35760;Name=CD630_35760;gbkey=Gene;gene_biotype=protein_coding;locus_tag=CD630_35760
gene5870	AM180355.1	287475	288725	+	gene	ID=gene-CD630_02240	ID=gene-CD630_02240;Name=purD;gbkey=Gene;gene=purD;gene_biotype=protein_coding;locus_tag=CD630_02240
gene5871	AM180355.1	690693	691943	-	gene	ID=gene-CD630_05780	ID=gene-CD630_05780;Name=CD630_05780;gbkey=Gene;gene_biotype=protein_coding;locus_tag=CD630_05780
gene5872	AM180355.1	3743481	3744731	+	gene	ID=gene-CD630_31980	ID=gene-CD630_31980;Name=cme;gbkey=Gene;gene=cme;gene_biotype=protein_coding;locus_tag=CD630_31980
gene5873	AM180355.1	3867812	3869062	-	gene	ID=gene-CD630_33040	ID=gene-CD630_33040;Name=clpX;gbkey=Gene;gene=clpX;gene_biotype=protein_coding;locus_tag=CD630_33040
gene5895	AM180355.1	1426332	1427579	+	gene	ID=gene-CD630_12280	ID=gene-CD630_12280;Name=CD630_12280;gbkey=Gene;gene_biotype=protein_coding;locus_tag=CD630_12280
gene5896	AM180355.1	1530563	1531810	+	gene	ID=gene-CD630_13200	ID=gene-CD630_13200;Name=CD630_13200;gbkey=Gene;gene_biotype=protein_coding;locus_tag=CD630_13200
gene5897	AM180355.1	2011031	2012278	+	gene	ID=gene-CD630_17370	ID=gene-CD630_17370;Name=CD630_17370;gbkey=Gene;gene_biotype=protein_coding;locus_tag=CD630_17370
gene5913	AM180355.1	1852645	1853895	-	gene	ID=gene-CD630_15970	ID=gene-CD630_15970;Name=CD630_15970;gbkey=Gene;gene_biotype=protein_coding;locus_tag=CD630_15970
gene5918	AM180355.1	469086	470312	+	gene	ID=gene-CD630_03970	ID=gene-CD630_03970;Name=hadB;gbkey=Gene;gene=hadB;gene_biotype=protein_coding;locus_tag=CD630_03970
gene593	AM180355.1	2874498	2877236	-	gene	ID=gene-CD630_24920	ID=gene-CD630_24920;Name=CD630_24920;gbkey=Gene;gene_biotype=protein_coding;locus_tag=CD630_24920
gene5935	AM180355.1	612924	614153	-	gene	ID=gene-CD630_05150	ID=gene-CD630_05150;Name=CD630_05150;gbkey=Gene;gene_biotype=protein_coding;locus_tag=CD630_05150
gene5952	AM180355.1	974669	975907	+	gene	ID=gene-CD630_08020	ID=gene-CD630_08020;Name=CD630_08020;gbkey=Gene;gene_biotype=protein_coding;locus_tag=CD630_08020
gene5960	AM180355.1	1383344	1384582	+	gene	ID=gene-CD630_11840	ID=gene-CD630_11840;Name=fabF;gbkey=Gene;gene=fabF;gene_biotype=protein_coding;locus_tag=CD630_11840
gene5961	AM180355.1	1902982	1904220	+	gene	ID=gene-CD630_16410	ID=gene-CD630_16410;Name=CD630_16410;gbkey=Gene;gene_biotype=protein_coding;locus_tag=CD630_16410
gene5966	AM180355.1	1144782	1146020	+	gene	ID=gene-CD630_09810	ID=gene-CD630_09810;Name=CD630_09810;gbkey=Gene;gene_biotype=protein_coding;locus_tag=CD630_09810
gene5980	AM180355.1	3130785	3132002	-	gene	ID=gene-CD630_27070	ID=gene-CD630_27070;Name=CD630_27070;gbkey=Gene;gene_biotype=protein_coding;locus_tag=CD630_27070
gene5988	AM180355.1	1018838	1020073	+	gene	ID=gene-CD630_08430	ID=gene-CD630_08430;Name=CD630_08430;gbkey=Gene;gene_biotype=protein_coding;locus_tag=CD630_08430
gene599	AM180355.1	951664	954357	-	gene	ID=gene-CD630_07810	ID=gene-CD630_07810;Name=CD630_07810;gbkey=Gene;gene_biotype=protein_coding;locus_tag=CD630_07810
gene5995	AM180355.1	233014	234240	+	gene	ID=gene-CD630_01760	ID=gene-CD630_01760;Name=CD630_01760;gbkey=Gene;gene_biotype=protein_coding;locus_tag=CD630_01760
gene6004	AM180355.1	1961868	1963100	+	gene	ID=gene-CD630_16890	ID=gene-CD630_16890;Name=CD630_16890;gbkey=Gene;gene_biotype=protein_coding;locus_tag=CD630_16890
gene6005	AM180355.1	3176013	3177245	-	gene	ID=gene-CD630_27380	ID=gene-CD630_27380;Name=CD630_27380;gbkey=Gene;gene_biotype=protein_coding;locus_tag=CD630_27380
gene6009	AM180355.1	1772218	1773447	-	gene	ID=gene-CD630_15290	ID=gene-CD630_15290;Name=CD630_15290;gbkey=Gene;gene_biotype=protein_coding;locus_tag=CD630_15290
gene6036	AM180355.1	4201307	4202536	+	gene	ID=gene-CD630_35950	ID=gene-CD630_35950;Name=CD630_35950;gbkey=Gene;gene_biotype=protein_coding;locus_tag=CD630_35950
gene6055	AM180355.1	1239139	1240365	+	gene	ID=gene-CD630_10460	ID=gene-CD630_10460;Name=pepT;gbkey=Gene;gene=pepT;gene_biotype=protein_coding;locus_tag=CD630_10460
gene6056	AM180355.1	3058332	3059561	-	gene	ID=gene-CD630_26510	ID=gene-CD630_26510;Name=murG;gbkey=Gene;gene=murG;gene_biotype=protein_coding;locus_tag=CD630_26510
gene608	AM180355.1	202040	204748	+	gene	ID=gene-CD630_01530	ID=gene-CD630_01530;Name=CD630_01530;gbkey=Gene;gene_biotype=protein_coding;locus_tag=CD630_01530
gene6083	AM180355.1	1532100	1533323	+	gene	ID=gene-CD630_13220	ID=gene-CD630_13220;Name=dapG;gbkey=Gene;gene=dapG;gene_biotype=protein_coding;locus_tag=CD630_13220
gene6104	AM180355.1	1370834	1372054	+	gene	ID=gene-CD630_11720	ID=gene-CD630_11720;Name=etfA4;gbkey=Gene;gene=etfA4;gene_biotype=protein_coding;locus_tag=CD630_11720
gene6105	AM180355.1	1603762	1604982	+	gene	ID=gene-CD630_13850	ID=gene-CD630_13850;Name=CD630_13850;gbkey=Gene;gene_biotype=protein_coding;locus_tag=CD630_13850
gene6133	AM180355.1	1831561	1832778	+	gene	ID=gene-CD630_15800	ID=gene-CD630_15800;Name=hom2;gbkey=Gene;gene=hom2;gene_biotype=protein_coding;locus_tag=CD630_15800
gene6135	AM180355.1	2344653	2345870	-	gene	ID=gene-CD630_20330	ID=gene-CD630_20330;Name=argJ;gbkey=Gene;gene=argJ;gene_biotype=protein_coding;locus_tag=CD630_20330
gene6136	AM180355.1	2901818	2903035	-	gene	ID=gene-CD630_25140	ID=gene-CD630_25140;Name=tdcB;gbkey=Gene;gene=tdcB;gene_biotype=protein_coding;locus_tag=CD630_25140
gene614	AM180355.1	2116049	2118751	+	gene	ID=gene-CD630_18290	ID=gene-CD630_18290;Name=kdpD;gbkey=Gene;gene=kdpD;gene_biotype=protein_coding;locus_tag=CD630_18290
gene6159	AM180355.1	2492241	2493449	+	gene	ID=gene-CD630_21540	ID=gene-CD630_21540;Name=CD630_21540;gbkey=Gene;gene_biotype=protein_coding;locus_tag=CD630_21540
gene6165	AM180355.1	3354056	3355270	+	gene	ID=gene-CD630_28680	ID=gene-CD630_28680;Name=CD630_28680;gbkey=Gene;gene_biotype=protein_coding;locus_tag=CD630_28680
gene6166	AM180355.1	3618638	3619852	+	gene	ID=gene-CD630_31100	ID=gene-CD630_31100;Name=CD630_31100;gbkey=Gene;gene_biotype=protein_coding;locus_tag=CD630_31100
gene6195	AM180355.1	1231739	1232950	+	gene	ID=gene-CD630_10420	ID=gene-CD630_10420;Name=sbcD;gbkey=Gene;gene=sbcD;gene_biotype=protein_coding;locus_tag=CD630_10420
gene6197	AM180355.1	2541031	2542245	+	gene	ID=gene-CD630_21940	ID=gene-CD630_21940;Name=CD630_21940;gbkey=Gene;gene_biotype=protein_coding;locus_tag=CD630_21940
gene6198	AM180355.1	3002093	3003304	-	gene	ID=gene-CD630_25940	ID=gene-CD630_25940;Name=uraA;gbkey=Gene;gene=uraA;gene_biotype=protein_coding;locus_tag=CD630_25940
gene6199	AM180355.1	3204195	3205406	-	gene	ID=gene-CD630_27570	ID=gene-CD630_27570;Name=CD630_27570;gbkey=Gene;gene_biotype=protein_coding;locus_tag=CD630_27570
gene621	AM180355.1	2107981	2110638	+	gene	ID=gene-CD630_18240	ID=gene-CD630_18240;Name=CD630_18240;gbkey=Gene;gene_biotype=protein_coding;locus_tag=CD630_18240
gene6213	AM180355.1	1963575	1964462	+	gene	ID=gene-CD630_16910	ID=gene-CD630_16910;Name=trxB;gbkey=Gene;gene=trxB;gene_biotype=protein_coding;locus_tag=CD630_16910
gene6225	AM180355.1	1763201	1764409	+	gene	ID=gene-CD630_15210	ID=gene-CD630_15210;Name=tyrS;gbkey=Gene;gene=tyrS;gene_biotype=protein_coding;locus_tag=CD630_15210
gene6226	AM180355.1	2799195	2800403	-	gene	ID=gene-CD630_24240	ID=gene-CD630_24240;Name=CD630_24240;gbkey=Gene;gene_biotype=protein_coding;locus_tag=CD630_24240
gene6227	AM180355.1	2938684	2939892	-	gene	ID=gene-CD630_25420	ID=gene-CD630_25420;Name=CD630_25420;gbkey=Gene;gene_biotype=protein_coding;locus_tag=CD630_25420
gene6228	AM180355.1	3111900	3113108	-	gene	ID=gene-CD630_26930	ID=gene-CD630_26930;Name=CD630_26930;gbkey=Gene;gene_biotype=protein_coding;locus_tag=CD630_26930
gene6229	AM180355.1	3624642	3625850	-	gene	ID=gene-CD630_31140	ID=gene-CD630_31140;Name=CD630_31140;gbkey=Gene;gene_biotype=protein_coding;locus_tag=CD630_31140
gene6230	AM180355.1	4102095	4103303	-	gene	ID=gene-CD630_35110	ID=gene-CD630_35110;Name=CD630_35110;gbkey=Gene;gene_biotype=protein_coding;locus_tag=CD630_35110
gene624	AM180355.1	547342	550002	+	gene	ID=gene-CD630_04600	ID=gene-CD630_04600;Name=CD630_04600;gbkey=Gene;gene_biotype=protein_coding;locus_tag=CD630_04600
gene6250	AM180355.1	23561	24766	-	gene	ID=gene-CD630_00190	ID=gene-CD630_00190;Name=CD630_00190;gbkey=Gene;gene_biotype=protein_coding;locus_tag=CD630_00190
gene6254	AM180355.1	1364274	1365479	+	gene	ID=gene-CD630_11660	ID=gene-CD630_11660;Name=hom1;gbkey=Gene;gene=hom1;gene_biotype=protein_coding;locus_tag=CD630_11660
gene6255	AM180355.1	1396465	1397676	+	gene	ID=gene-CD630_11960	ID=gene-CD630_11960;Name=spoIIIAE;gbkey=Gene;gene=spoIIIAE;gene_biotype=protein_coding;locus_tag=CD630_11960
gene6256	AM180355.1	1401749	1402954	+	gene	ID=gene-CD630_12030	ID=gene-CD630_12030;Name=xseA;gbkey=Gene;gene=xseA;gene_biotype=protein_coding;locus_tag=CD630_12030
gene6279	AM180355.1	2604565	2605761	-	gene	ID=gene-CD630_22480	ID=gene-CD630_22480;Name=CD630_22480;gbkey=Gene;gene_biotype=protein_coding;locus_tag=CD630_22480
gene6285	AM180355.1	1554562	1555758	-	gene	ID=gene-CD630_13390	ID=gene-CD630_13390;Name=aspB;gbkey=Gene;gene=aspB;gene_biotype=protein_coding;locus_tag=CD630_13390
gene6288	AM180355.1	1907045	1908247	+	gene	ID=gene-CD630_16450	ID=gene-CD630_16450;Name=CD630_16450;gbkey=Gene;gene_biotype=protein_coding;locus_tag=CD630_16450
gene6289	AM180355.1	3010077	3011279	-	gene	ID=gene-CD630_26020	ID=gene-CD630_26020;Name=CD630_26020;gbkey=Gene;gene_biotype=protein_coding;locus_tag=CD630_26020
gene6290	AM180355.1	3707722	3708924	-	gene	ID=gene-CD630_31730	ID=gene-CD630_31730;Name=pgk;gbkey=Gene;gene=pgk;gene_biotype=protein_coding;locus_tag=CD630_31730
gene6307	AM180355.1	4251168	4252277	-	gene	ID=gene-CD630_36420	ID=gene-CD630_36420;Name=CD630_36420;gbkey=Gene;gene_biotype=protein_coding;locus_tag=CD630_36420
gene6312	AM180355.1	467033	468232	+	gene	ID=gene-CD630_03950	ID=gene-CD630_03950;Name=hadA;gbkey=Gene;gene=hadA;gene_biotype=protein_coding;locus_tag=CD630_03950
gene6313	AM180355.1	2067107	2068306	+	gene	ID=gene-CD630_17850	ID=gene-CD630_17850;Name=argG;gbkey=Gene;gene=argG;gene_biotype=protein_coding;locus_tag=CD630_17850
gene6314	AM180355.1	2251170	2252369	+	gene	ID=gene-CD630_19530	ID=gene-CD630_19530;Name=CD630_19530;gbkey=Gene;gene_biotype=protein_coding;locus_tag=CD630_19530
gene6316	AM180355.1	2992700	2993899	-	gene	ID=gene-CD630_25870	ID=gene-CD630_25870;Name=coaBC;gbkey=Gene;gene=coaBC;gene_biotype=protein_coding;locus_tag=CD630_25870
gene6317	AM180355.1	3345577	3346776	-	gene	ID=gene-CD630_28620	ID=gene-CD630_28620;Name=CD630_28620;gbkey=Gene;gene_biotype=protein_coding;locus_tag=CD630_28620
gene6318	AM180355.1	3556888	3558102	-	gene	ID=gene-CD630_30630	ID=gene-CD630_30630;Name=CD630_30630;gbkey=Gene;gene_biotype=protein_coding;locus_tag=CD630_30630
gene633	AM180355.1	3811259	3813925	-	gene	ID=gene-CD630_32560	ID=gene-CD630_32560;Name=valS;gbkey=Gene;gene=valS;gene_biotype=protein_coding;locus_tag=CD630_32560
[truncated: 470 more rows]
